1 **Tissue-resident CD4<sup>+</sup> T helper cells assist protective respiratory mucosal B and CD8<sup>+</sup> T cell**  
2 **memory responses**

3  
4

5 Young Min Son<sup>1,2</sup>, In Su Cheon<sup>1,2</sup>, Yue Wu<sup>1,2</sup>, Chaofan Li<sup>1,2</sup>, Zheng Wang<sup>1,2</sup>, Yao Chen<sup>3</sup>,  
6 Yoshimasa Takahashi<sup>4</sup>, Alexander L. Dent<sup>5</sup>, Mark H Kaplan<sup>5</sup>, Yang-Xin Fu<sup>6</sup>, Justin J. Taylor<sup>7</sup>,  
7 Weiguo Cui<sup>3,8</sup> and Jie Sun<sup>1,2</sup> \*

8

9 1. Department of Medicine, Mayo Clinic, Rochester, MN 55905, USA

10 2. Department of Immunology, Mayo Clinic, Rochester, MN 55905, USA

11 3. Versiti Blood Research Institute, Milwaukee, WI 53213, USA

12 4. Department of Immunology, National Institute of Infectious Diseases, Shinjuku-ku, Tokyo  
13 162-8640, Japan

14 5. Department of Microbiology and Immunology, Indiana University School of Medicine,  
15 Indianapolis, IN 46202, USA

16 6. Department of Pathology, UT Southwestern Medical Center, Dallas, TX, 75235, USA.

17 7. Vaccine and Infectious Disease Division, Fred Hutchinson Cancer Research Center, Seattle,  
18 WA, USA.

19 8. Department of Microbiology and Immunology, Medical College of Wisconsin, Milwaukee,  
20 WI 53226, USA

21

22

23

24 \* Correspondence author. Email: [sun.jie@mayo.edu](mailto:sun.jie@mayo.edu)

25

26

27

28

29

30

31

32 **Abstract**

33 The roles of CD4<sup>+</sup> T helper cells (T<sub>H</sub>) in shaping localized memory B and CD8<sup>+</sup> T cell immunity  
34 in the mucosal tissues are largely unexplored. Here, we report that lung T<sub>H</sub> cells provide local  
35 assistance for the optimal development of tissue-resident memory B (B<sub>RM</sub>) and CD8<sup>+</sup> T (T<sub>RM</sub>)  
36 cells following the resolution of primary influenza virus infection. We identify a population of  
37 tissue-resident CD4<sup>+</sup> T<sub>H</sub> (*aka* T<sub>RH</sub>) cells that co-exhibit follicular T helper (T<sub>FH</sub>) and T<sub>RM</sub> cell  
38 features and mediate local help of CD4<sup>+</sup> T cells to B and CD8<sup>+</sup> T cells. Optimal T<sub>RH</sub> cell  
39 formation requires lung B cells and transcription factors involved in T<sub>FH</sub> or T<sub>RM</sub> development.  
40 Further, we show that T<sub>RH</sub> cells deliver local help to B and CD8 T cells through CD40L and IL-  
41 21-dependent mechanisms. Our data have uncovered a new tissue-resident T<sub>H</sub> cell population  
42 that is specialized in assisting the development of mucosal protective B and CD8<sup>+</sup> T cell  
43 responses *in situ*.

44

45

46

47

48

49

50

51

52

53

54

55

56

57

58

59

60

61

62

## 63 Introduction

64 The long-term protection against pathogen reinfection is mediated by long-lived plasma cells,  
65 memory B cells ( $B_{MEM}$ ) and/or memory T ( $T_{MEM}$ ) cells. In addition to circulating  $B_{MEM}$  and  $T_{MEM}$   
66 cells, tissue-resident memory B ( $B_{RM}$ ) and T ( $T_{RM}$ ) cells that reside in the mucosal sites have  
67 recently been identified and characterized<sup>1, 2, 3, 4, 5</sup>.  $B_{RM}$  and  $T_{RM}$  cells are able to mount rapid  
68 recall responses *in situ* against invading pathogens before pathogen dissemination, and therefore  
69 are thought to provide immediate and superior protection against secondary infections<sup>1, 6, 7, 8</sup>.  
70 However, the mechanisms underlying the development and persistence of robust  $B_{RM}$  and  $T_{RM}$   
71 cell responses in the respiratory tract are largely undefined. Furthermore, we do not know  
72 whether there are cellular and molecular pathways that can be targeted to simultaneously  
73 promote both  $B_{RM}$  and  $T_{RM}$  responses for maximal protection against pathogen reinfections.

74  
75 Influenza viruses remain a leading cause of respiratory tract infections despite progress in  
76 antiviral therapies. Each year, influenza virus infects 5–10% of adults and 20–30% of children  
77 worldwide<sup>9, 10</sup>, resulting up to 35.6 million illnesses and 56,000 deaths annually in the U.S. since  
78 2010<sup>11</sup>. Influenza virus infection induces potent development of protective  $B_{RM}$  and  $CD8^+ T_{RM}$   
79 responses in the respiratory mucosal tissue<sup>5, 12, 13</sup>. Compared to  $B_{MEM}$  cells in the secondary  
80 lymphoid organs, lung  $B_{RM}$  have enhanced percentages of cells poised for cross-reactive memory  
81 repertoires, potentially due to the local supply of  $B_{RM}$  precursors by persistent germinal center  
82 (GC) responses in the inducible bronchus-associated lymphoid tissues (iBALT) following  
83 primary influenza infection<sup>14</sup>. Therefore, influenza-specific  $B_{RM}$  cells are thought to provide  
84 better cross-protection at the site of infection compared to their counterparts in the secondary  
85 lymphoid organs<sup>1, 14</sup>. Additionally, lung  $B_{RM}$  cells, but not systemic  $B_{MEM}$  cells, contributed to  
86 early plasmablast responses following influenza re-infection, which are potentially important in  
87 restricting early viral dissemination<sup>1, 5, 14</sup>.  $T_{MEM}$  responses against conserved influenza internal  
88 epitopes confer cross-reactive protection against influenza viruses that escape neutralizing  
89 antibody (Ab) responses<sup>15, 16, 17, 18, 19, 20</sup>. In animal models, influenza-specific lung  $CD8^+ T_{RM}$   
90 cells can rapidly respond to heterologous influenza virus reinfection before it can replicate to  
91 high titers<sup>21, 22</sup>. Influenza-specific  $CD8^+ T_{RM}$  cells have also been detected in human lungs and  
92 are thought to be important for the protection against severe influenza-associated diseases<sup>23, 24</sup>.  
93 However, compared to other tissues, lung protective  $CD8^+ T_{RM}$  responses are short-lived in

94 nature<sup>25,26</sup>. Thus, understanding the cellular and molecular mechanisms regulating the  
95 development and/or maintenance of lung protective B<sub>RM</sub> and/or CD8<sup>+</sup>T<sub>RM</sub> responses may aid the  
96 design of future influenza vaccines.

97  
98 CD4<sup>+</sup> T helper (T<sub>H</sub>) cells are important in anti-influenza immune responses by providing  
99 essential “help” for the development of effector and memory CD8<sup>+</sup> T and germinal center B (B<sub>GC</sub>)  
100 cell responses<sup>15</sup>. CD4<sup>+</sup> T cells are not required for the generation of effector CD8<sup>+</sup> T cells during  
101 primary influenza infection<sup>27</sup>, but are needed for the production of IL-10 by influenza-specific  
102 effector CD8 T cells<sup>28</sup>. CD4<sup>+</sup> T cell help, particularly during the priming stage, is vital for the  
103 development of circulating T<sub>MEM</sub> and CD103<sup>+</sup> T<sub>RM</sub> following primary influenza infection<sup>29,30</sup>.  
104 Similarly, CD4<sup>+</sup> T cell help, mediated mainly through follicular helper T cells (T<sub>FH</sub>) in the  
105 secondary lymphoid organs, is required for assisting B cells to form GC and the production of  
106 high affinity antibodies during influenza infection<sup>31,32,33</sup>. However, whether CD4<sup>+</sup> T cells can  
107 assist local B and CD8<sup>+</sup> T cell memory responses at the mucosal tissue following the resolution  
108 of primary infection is unknown. Several recent studies have also identified a population of PD-  
109 1<sup>hi</sup> “T<sub>FH</sub>-like” cells in the peripheral tissues during autoimmunity<sup>34,35,36</sup>. However, the  
110 developmental cues and the precise physiological functions of these cells remain largely elusive.  
111 During influenza infection, the existence of a lung “T<sub>FH</sub>-like” cell population that can potentially  
112 sustain lung B<sub>GC</sub> responses has been recently demonstrated<sup>35,37,38</sup>, but is still controversial<sup>5,36</sup>.

113  
114 Here, we have identified a population of lung CD4<sup>+</sup> helper T (T<sub>H</sub>) cells developed after influenza  
115 viral clearance, co-exhibiting T<sub>FH</sub> and T<sub>RM</sub> features. Based on their gene expression, sessile  
116 features and functional properties, we termed these cells tissue-resident T helper cells (T<sub>RH</sub>).  
117 Importantly, T<sub>RH</sub> cells provide local help for the generation of strong B<sub>GC</sub> and B<sub>RM</sub> responses, as  
118 well as a CD8<sup>+</sup> T<sub>RM</sub> population that is critical for the protection against heterologous influenza  
119 virus infection<sup>39,40</sup>. We further identified the molecular cues mediating T<sub>RH</sub> cell help to B and  
120 CD8<sup>+</sup> T cells. Our findings reveal a previously unidentified tissue-resident T<sub>H</sub> cell population  
121 that is important in assisting local development of protective memory B and CD8<sup>+</sup> T cell  
122 responses in the respiratory mucosal tissue.

123

124

125 **Results**

126 **Lung CD4<sup>+</sup> T cells provide “late” help for the formation of B<sub>GC</sub>, B<sub>RM</sub> and CD8<sup>+</sup> T<sub>RM</sub>**  
127 **responses *in situ***

128 We sought to determine whether CD4<sup>+</sup> T cell help can assist local B and CD8<sup>+</sup> T cell memory  
129 responses at the mucosal tissue following the clearance of primary infection. To this end, we  
130 utilized a mouse model of influenza A virus PR8/34 (PR8) infection, in which viral clearance  
131 occurs within 10 days post infection (d.p.i.)<sup>41,42,43</sup>. We infected WT mice with PR8 virus and  
132 depleted CD4<sup>+</sup> T cells with  $\alpha$ -CD4 (GK1.5, 250  $\mu$ g/mouse/weekly) injection starting at 14 d.p.i.  
133 (Fig. 1a). CD4<sup>+</sup> T cells were largely depleted in the spleen and the lung as confirmed by flow  
134 cytometry (Extended Fig. 1a). At 42 d.p.i., we analyzed lung tissue B and T cell responses  
135 through intravenous (i.v.) injection of  $\alpha$ -CD45 5 min before mouse sacrifice as we and others  
136 reported<sup>40,44,45</sup>. In this setting, CD45<sub>i.v.</sub><sup>-</sup> cells were within lung tissue, while CD45<sub>i.v.</sub><sup>+</sup> cells were  
137 in lung blood vessels. CD4<sup>+</sup> T cell depletion disrupted the formation of iBALT, which contained  
138 B cell and CD4<sup>+</sup> T cell aggregates<sup>37,46,47</sup> (Fig. 1b and Extended Fig. 1b). CD4<sup>+</sup> T cell depletion  
139 also abrogated lung B<sub>GC</sub> responses (Extended Fig. 1c). We then examined influenza  
140 Hemagglutinin-specific B (HA-B) cell responses in the lungs and spleens following CD4<sup>+</sup> T cell  
141 depletion at 42 d.p.i. CD4<sup>+</sup> T cell depletion did not affect lung circulating (CD45<sub>i.v.</sub><sup>+</sup>) nor splenic  
142 HA-specific B cell responses, but drastically diminished total and HA-specific B cells in the lung  
143 tissue at the memory stage (Fig. 1c and Extended Fig. 1d, e).

144  
145 We next examined influenza-specific CD8<sup>+</sup> memory T cell responses in the lungs and spleens  
146 following CD4<sup>+</sup> T cell depletion. To do so, we checked lung CD8<sup>+</sup> memory T cell responses  
147 against two dominant influenza MHC-I H-2D<sup>b</sup>-restricted epitopes, nucleoprotein peptide 366-  
148 374 (NP<sub>366-374</sub>) and polymerase peptide 224-233 (PA<sub>224-233</sub>) through tetramer staining at 42 d.p.i.  
149<sup>40</sup>. It has been shown before that CD8<sup>+</sup> memory T cells against NP<sub>366-374</sub> or PA<sub>224-233</sub> epitope  
150 exhibit distinct phenotypic and recall properties<sup>40,48,49,50</sup>. Specifically, lung CD8<sup>+</sup> NP<sub>366-374</sub>  
151 memory T cells are highly protective and dominate over the CD8<sup>+</sup> PA<sub>224-233</sub> memory T cells in  
152 the secondary recall expansion upon re-challenge with heterotypic influenza virus<sup>40,48,49,50</sup>. We  
153 found that late CD4<sup>+</sup> T cell depletion did not affect lung circulating or tissue CD8<sup>+</sup> PA<sub>224-233</sub>  
154 memory T cell population (Fig. 1d and Extended Fig. 1f, g). However, late CD4<sup>+</sup> T cell depletion  
155 caused significant decrease of the magnitude of CD8<sup>+</sup> NP<sub>366-374</sub> memory T cells in the lung tissue

156 compartment but not in the circulation (Fig. 1d and Extended Fig. 1f, g). The magnitudes of  
157 parenchymal CD8<sup>+</sup> CD69<sup>+</sup> NP<sub>366-374</sub> T<sub>RM</sub> or CD8<sup>+</sup> CD69<sup>+</sup> CD103<sup>+</sup> NP<sub>366-374</sub> T<sub>RM</sub> cells were also  
158 diminished following late CD4<sup>+</sup> T cell depletion (Fig. 1d and Extended Fig. 1h). Notably, late  
159 CD4<sup>+</sup> T cell depletion did not affect the percentages of CD103<sup>+</sup> cells within the CD8<sup>+</sup> CD69<sup>+</sup>  
160 NP<sub>366-374</sub> T<sub>RM</sub> population (Extended Fig. 1i), which is in contrast with the results observed  
161 following CD4<sup>+</sup> T cell depletion before influenza infection<sup>30</sup>. Contrary to the diminished  
162 magnitude of lung CD8<sup>+</sup> NP<sub>366-374</sub> T<sub>RM</sub> cells, late CD4<sup>+</sup> T cell depletion did not decrease CD8<sup>+</sup>  
163 NP<sub>366-374</sub> or CD8<sup>+</sup> PA<sub>224-233</sub> memory T cells (T<sub>MEM</sub>) in the lung vasculature or spleen (Fig. 1e and  
164 Extended Fig. 1g). Thus, these data suggest that continuous CD4<sup>+</sup> T cell help following viral  
165 clearance is required for the persistence of optimal B and CD8<sup>+</sup> T cell responses (against a  
166 dominant protective epitope) in the lung at the memory stage.

167

168 It is possible that CD4<sup>+</sup> T cells may provide the “help” either in the circulation or in the lungs for  
169 the generation of optimal tissue memory B and CD8<sup>+</sup> T cells. To determine whether lung tissue  
170 CD4<sup>+</sup> T cells can provide the “local help” for lung memory B and CD8<sup>+</sup> T cell generation, we  
171 infected WT mice with PR8 virus and depleted CD4<sup>+</sup> T cells at 14 d.p.i. in the presence of  
172 FTY720 (Fig. 1f), a chemical that blocks lymphocyte migration<sup>51</sup>. We confirmed that FTY720  
173 treatment drastically diminished T and B cell circulation in the blood (Extended Fig. 2a). The  
174 depletion of CD4<sup>+</sup> T cells abolished B<sub>GC</sub> cell development, total HA-specific B cells (HA-B) and  
175 strikingly HA-specific B<sub>RM</sub> (HA-B<sub>RM</sub>) cells (identified as CD45<sub>i.v.</sub><sup>-</sup> B220<sup>+</sup> GL7<sup>-</sup> IgD<sup>-</sup> IgM<sup>-</sup> CD38<sup>+</sup>  
176 HA<sup>+</sup>, Extended Fig. 1j) in the lungs (Fig. 1 g-i) even in the presence of FTY720. CD4<sup>+</sup> T cell  
177 depletion also diminished lung tissue CD8<sup>+</sup> NP<sub>366-374</sub>-specific T<sub>MEM</sub>, CD8<sup>+</sup> CD69<sup>+</sup> T<sub>RM</sub> and CD8<sup>+</sup>  
178 CD69<sup>+</sup> CD103<sup>+</sup> T<sub>RM</sub> cells (Fig. 1j). Similar data were observed following CD4<sup>+</sup> T cell depletion  
179 in the presence of FTY720 during H3N2 X31 influenza virus infection (Extended Fig. 2 b-e).  
180 Thus, lung CD4<sup>+</sup> T cells can provide *in situ* “help” to local B and CD8<sup>+</sup> T cells for the optimal  
181 development of B<sub>GC</sub>, B<sub>RM</sub> and CD8<sup>+</sup> T<sub>RM</sub> cells following viral clearance.

182

183 We next sought to examine whether lung tissue CD4<sup>+</sup> T cells are sufficient for the generation of  
184 B<sub>GC</sub>, B<sub>RM</sub> and CD8<sup>+</sup> T<sub>RM</sub> responses following the clearance of the primary infection, in the  
185 absence of circulating CD4<sup>+</sup> T cells. To do so, we injected low or high doses of α-CD4 into  
186 PR8-infected WT mice at 14 d.p.i. Low dose α-CD4 treatment largely ablated CD4<sup>+</sup> T cells in

187 the circulating blood, but not in the lung parenchyma, while high dose  $\alpha$ -CD4 injection depleted  
188 both circulating and lung parenchymal CD4<sup>+</sup> T cells (Extended Fig. 2 f-h). Strikingly, the high  
189 dose, but not the low dose, of  $\alpha$ -CD4 treatment diminished the magnitude of lung B<sub>GC</sub>, influenza  
190 NP (nucleoprotein)-specific B<sub>RM</sub> and CD8<sup>+</sup> NP<sub>366-374</sub> T<sub>RM</sub> (including CD69<sup>+</sup> T<sub>RM</sub> or  
191 CD69<sup>+</sup>CD103<sup>+</sup> T<sub>RM</sub>) cells (Fig. 1 k-n). Taken together, our data suggest that lung tissue CD4<sup>+</sup> T  
192 cells, rather than CD4<sup>+</sup> T cells in the circulation, provide late “local help” for the optimal  
193 generation of B<sub>GC</sub>, B<sub>RM</sub> and CD8<sup>+</sup> T<sub>RM</sub> responses following influenza infection.

194

### 195 **Identification of a population of T<sub>FH</sub>-like cells in the lung**

196 We next sought to identify the lung CD4<sup>+</sup> T cell populations that may mediate the local help to B  
197 and/or CD8<sup>+</sup> T cells. To do so, we performed single cell (sc) RNA-seq on CD45<sub>i.v.</sub><sup>-</sup> lung  
198 parenchymal CD4<sup>+</sup> T cells at 28 d.p.i. Hierarchical clustering analysis identified 5 separated  
199 CD4<sup>+</sup> T cell populations within the lung parenchyma (Fig. 2a and Extended Fig. 3 a, b). These  
200 cell populations included Th1 effector/memory-like cells (expressing high levels of *Cxcr6/Tbx21*  
201 (T-bet), cluster 0), T cells recently entering the lungs or circulating effector memory T cells  
202 (expressing high *Klf2/SIpr1*, cluster 1), regulatory T cells (Treg, expressing *Foxp3*, cluster 2),  
203 Th17-like (expressing *Il17/Ccr6/Rora*, cluster 4) and a cluster of T cells exhibiting features of  
204 T<sub>FH</sub> cells (expressing *Bcl6/Il21*, cluster 3) (Fig. 2b and Extended Fig. 3 a-c). Cluster 3 CD4<sup>+</sup> T  
205 cells also expressed higher levels of T<sub>FH</sub>-associated surface molecules *Pdcd1*(PD-1), *Cxcr5* and  
206 *Izumo1r* (FR4) (Fig. 2b).

207

208 Flow cytometry analysis identified a population of total CD4<sup>+</sup> or influenza-specific CD4<sup>+</sup> NP<sub>311-325</sub>  
209 PD-1<sup>Hi</sup>FR4<sup>Hi</sup> T cells that developed following influenza infection and expressed T<sub>FH</sub>-  
210 associated markers including BCL6, ICOS and P2RX7, but relatively lower levels of CXCR5  
211 compared to splenic T<sub>FH</sub> cells (Fig. 2 c, d). Similar to splenic T<sub>FH</sub> cells, lung CD4<sup>+</sup> PD-1<sup>Hi</sup>FR4<sup>Hi</sup>  
212 T cells expressed low levels of IFN- $\gamma$  and IL-17 (Fig. 2e). However, splenic T<sub>FH</sub> cells expressed  
213 significantly higher IL-4 than lung CD4<sup>+</sup> PD-1<sup>Hi</sup>FR4<sup>Hi</sup> T cells (Fig. 2 e). We next examined  
214 whether lung CD4<sup>+</sup> PD-1<sup>Hi</sup>FR4<sup>Hi</sup> T cells expressed the T<sub>FH</sub> signature cytokine IL-21 following  
215 influenza virus infection using the IL-21-VFP reporter mice<sup>52</sup>. Lung CD4<sup>+</sup> PD-1<sup>Low</sup> FR4<sup>Low</sup> T  
216 cell population expressed modest levels of IL-21, but the lung CD4<sup>+</sup> PD-1<sup>Hi</sup>FR4<sup>Hi</sup> T cells  
217 expressed high levels of IL-21, almost comparable to those of splenic T<sub>FH</sub> cells (Fig. 2f). These



218 data suggest that there is a lung tissue CD4<sup>+</sup> T cell population, transcriptionally and  
219 phenotypically resembling T<sub>FH</sub> cells in the secondary lymphoid organs.

220

### 221 **Transcriptional profiling reveals lung T<sub>FH</sub>-like cells exhibit T<sub>RM</sub> gene signature**

222 To gain more insights into the phenotype and identity of lung T<sub>FH</sub>-like cells, we sought to  
223 compare the transcriptional signatures of lung T<sub>FH</sub>-like cells to splenic T<sub>FH</sub>, non-T<sub>FH</sub> and lung  
224 non-T<sub>FH</sub>-like cell signatures. Foxp3<sup>+</sup> Treg cells expressed FR4, GITR and PD-1 (albeit their PD-  
225 1 levels were lower than T<sub>FH</sub>-like cells) (Fig. 2b and Extended Fig. 3c and 4a). To minimize the  
226 potential contribution of Treg cells on the transcriptional profiles of lung T<sub>FH</sub>-like cells, we  
227 excluded splenic or lung GITR<sup>+</sup> CD4<sup>+</sup> T cells, which were mostly Foxp3<sup>+</sup> cells, in our sorting  
228 (Extended Fig. 4a). We then sorted splenic non-T<sub>FH</sub> (CD4<sup>+</sup>CD44<sup>Hi</sup>GITR<sup>-</sup>CXCR5<sup>Low</sup>PD-1<sup>Low</sup>),  
229 splenic T<sub>FH</sub> (CD4<sup>+</sup>CD44<sup>Hi</sup>GITR<sup>-</sup>CXCR5<sup>Hi</sup>PD-1<sup>Hi</sup>), lung non-T<sub>FH</sub>-like cells (CD45<sub>i.v.</sub><sup>-</sup>  
230 CD4<sup>+</sup>CD44<sup>Hi</sup>GITR<sup>-</sup>PD-1<sup>Low</sup>FR4<sup>Low</sup>) and lung T<sub>FH</sub>-like cells (CD45<sub>i.v.</sub><sup>-</sup>CD4<sup>+</sup>CD44<sup>Hi</sup>GITR<sup>-</sup>PD-1<sup>Hi</sup>  
231 FR4<sup>Hi</sup>) cells and performed RNA-seq analysis.

232

233 Differential gene expression and principal component analysis revealed that those four different  
234 CD4<sup>+</sup> T cell populations have distinct gene expression patterns, although lung CD4<sup>+</sup> PD-  
235 1<sup>Hi</sup>FR4<sup>Hi</sup> cells were more distinct from splenic non-T<sub>FH</sub> cells relative to splenic T<sub>FH</sub> or lung CD4<sup>+</sup>  
236 PD-1<sup>Low</sup>FR4<sup>Low</sup> cells (Fig. 3a, b and Extended Fig. 4b). When directly compared to lung CD4<sup>+</sup>  
237 PD-1<sup>Low</sup>FR4<sup>Low</sup> cells, lung CD4<sup>+</sup> PD-1<sup>Hi</sup>FR4<sup>Hi</sup> cells highly expressed T<sub>FH</sub>-associated genes  
238 including *Il21*, *Tox2* and *Pdcd1* (Fig. 3c). Indeed, Gene Set Enrichment Analysis (GSEA)  
239 showed that lung CD4<sup>+</sup> PD-1<sup>Hi</sup>FR4<sup>Hi</sup> cells had enrichment of T<sub>FH</sub>-associated genes<sup>53</sup> relative to  
240 CD4<sup>+</sup> PD-1<sup>Low</sup>FR4<sup>Low</sup> cells (Fig. 3d). Conversely, lung CD4<sup>+</sup> PD-1<sup>Low</sup>FR4<sup>Low</sup> cells expressed  
241 higher levels of *Ly6c* and *Il7r*, and showed enhanced enrichment of genes in TGF-β, hypoxia and  
242 Notch signaling relative to PD-1<sup>Hi</sup>FR4<sup>Hi</sup> cells (Fig. 3c and Extended Fig. 4c). When compared to  
243 splenic T<sub>FH</sub> cells, lung CD4<sup>+</sup> PD-1<sup>Hi</sup>FR4<sup>Hi</sup> cells showed increased expression of genes associated  
244 with tissue migration, retention and function including *Ccr2*, *Bhlhe40* and *Cxcr6* (Fig. 3e)<sup>54, 55</sup>.  
245 GSEA analysis revealed that lung CD4<sup>+</sup> PD-1<sup>Hi</sup>FR4<sup>Hi</sup> had significant enrichment of T<sub>RM</sub>-  
246 associated genes relative to splenic T<sub>FH</sub> cells (Fig. 3f)<sup>56</sup>. Lung CD4<sup>+</sup> PD-1<sup>Hi</sup>FR4<sup>Hi</sup> cells also had  
247 higher expression of genes associated with IL-2/STAT5, NF-κB and interferon signaling,  
248 whereas splenic T<sub>FH</sub> cells had higher enrichment of Myc and PI3K-mTOR signaling (Extended



249 Fig. 4d). Thus, these RNA-seq analyses indicate that lung CD4<sup>+</sup> PD-1<sup>Hi</sup>FR4<sup>Hi</sup> cells exhibit  
250 transcriptional signatures of both T<sub>FH</sub> cells and T<sub>RM</sub> cells.

251  
252 To confirm these observations, we sorted splenic T<sub>FH</sub>, lung CD4<sup>+</sup> PD-1<sup>Hi</sup>FR4<sup>Hi</sup> or lung CD4<sup>+</sup> PD-  
253 1<sup>Low</sup>FR4<sup>Low</sup> cells and performed Nanostring analysis of 560-immune associated genes without  
254 the need of RNA amplification<sup>40</sup>. Compared to lung CD4<sup>+</sup> PD-1<sup>Low</sup>FR4<sup>Low</sup> cells, splenic T<sub>FH</sub> and  
255 lung CD4<sup>+</sup> PD-1<sup>Hi</sup>FR4<sup>Hi</sup> cells expressed higher levels of T<sub>FH</sub>-associated genes including *Bcl6*,  
256 *Sh2d1a* and *Tcf7* (Fig. 3g). Compared to splenic T<sub>FH</sub> cells, both PD-1<sup>Hi</sup>FR4<sup>Hi</sup> and PD-1<sup>Low</sup>  
257 FR4<sup>Low</sup> lung CD4<sup>+</sup> T cell populations had enhanced expression of genes associated with tissue  
258 migration and residency, but diminished expression of lymphoid migration or retention  
259 molecules *Sell* (CD62L) and *Ccr7* (Fig. 3h). Altogether, these data suggest that lung CD4<sup>+</sup> PD-  
260 1<sup>Hi</sup>FR4<sup>Hi</sup> cells exhibit a “hybrid” gene signature of both conventional T<sub>FH</sub> cells and T<sub>RM</sub> cells.

### 261 262 **Lung CD4<sup>+</sup> PD-1<sup>Hi</sup>FR4<sup>Hi</sup> T cells are tissue-resident**

263 Given that lung CD4<sup>+</sup> PD-1<sup>Hi</sup>FR4<sup>Hi</sup> cells showed gene signatures of tissue residency, we sought  
264 to determine whether these cells are indeed tissue-resident. Using flow cytometry, we confirmed  
265 that PD-1<sup>Hi</sup>FR4<sup>Hi</sup> cells expressed higher levels of CD69, CXCR6 and *Bhlhe40*, molecules  
266 associated with T cell migration, retention and function in the respiratory mucosal tissue,  
267 compared to splenic T<sub>FH</sub> cells (Fig. 4a). We then performed parabiosis experiments and joined  
268 the circulation of PR8-infected CD45.1<sup>+</sup> and CD45.1<sup>+</sup> CD45.2<sup>+</sup> congenic mice at 21 d.p.i. (Fig.  
269 4b). We examined CD4<sup>+</sup> T cell exchange between the two parabionts after 2 weeks of parabiosis.  
270 Close to 40-60 % of splenic CD4<sup>+</sup> T cells in parabiont hosts were derived from their parabiont  
271 pair (Fig. 4c), suggesting the successful exchange of circulating CD4<sup>+</sup> T cells between the  
272 parabionts. Within lung i.v. CD45 antibody (Ab) protected tissue CD4<sup>+</sup> T cell compartment, PD-  
273 1<sup>Hi</sup>FR4<sup>Hi</sup> total CD4<sup>+</sup> or antigen (Ag)-specific CD4<sup>+</sup> NP<sub>311-325</sub> T cells exhibited limited exchange  
274 between the two parabionts (Fig. 4d, e), suggesting that these cells are mostly tissue-resident. Of  
275 note, most of Ag-specific CD4<sup>+</sup> NP<sub>311-325</sub> T cells are tissue-resident (Fig. 4e), while total lung  
276 CD4<sup>+</sup> PD-1<sup>Low</sup>FR4<sup>Low</sup> T cells showed higher circulating rate than those of CD4<sup>+</sup> PD-1<sup>Hi</sup>FR4<sup>Hi</sup>  
277 cells (Fig. 4 d). Thus, lung CD4<sup>+</sup> PD-1<sup>Hi</sup>FR4<sup>Hi</sup> cells are lung tissue-resident T cells exhibiting  
278 both T<sub>FH</sub> and T<sub>RM</sub> features. Based on their gene signature, protein expression, cytokine  
279 production and tissue residency property, we termed these cells as tissue-resident T helper (T<sub>RH</sub>)

280 cells.

281

## 282 **T<sub>RH</sub> responses require B cells and lung tertiary lymphoid structure formation**

283 T<sub>FH</sub> generation requires the presence of B cells<sup>57</sup>. We therefore examined whether lung B cells  
284 are required for the generation of T<sub>RH</sub> cells following influenza infection. To do so, we infected  
285 WT mice with PR8 and then depleted B cells with  $\alpha$ -CD20 treatment in the presence of FTY-  
286 720 to block T/B cell migration (Fig. 5a). We validated that  $\alpha$ -CD20 treatment depleted lung B  
287 cells (Extended Fig. 5a). We then determined splenic T<sub>FH</sub> and lung T<sub>RH</sub> responses with or  
288 without  $\alpha$ -CD20 treatment at 28 d.p.i. Consistent with previous findings<sup>58</sup>, B cell depletion  
289 following  $\alpha$ -CD20 treatment diminished splenic T<sub>FH</sub> responses (Fig. 5b).  $\alpha$ -CD20 treatment also  
290 impaired lung T<sub>RH</sub> responses, but not lung non-T<sub>RH</sub> (PD-1<sup>Low</sup>FR4<sup>Low</sup>) responses. Thus, lung B  
291 cells are required for the development of T<sub>RH</sub> responses. Tertiary lymphoid structures (iBALT)  
292 form in the lung that consist of aggregated B, T and dendritic cells (DCs) following influenza  
293 viral clearance<sup>37,46,47</sup>. IL-21 expressing lung CD4<sup>+</sup> T cells were found in the iBALT from PR8-  
294 infected IL-21-VFP reporter mice (Extended Fig. 5b), suggesting that iBALT formation may be  
295 required for optimal T<sub>RH</sub> responses following influenza virus clearance. To this end, we infected  
296 WT mice with PR8 and then injected the mice with lymphotoxin beta receptor Ig fusion protein  
297 (LT $\beta$ R-Ig) in the presence of FTY-720 to deplete iBALTs in the lungs<sup>59,60</sup> (Fig. 5a). We  
298 confirmed that LT $\beta$ R-Ig injection diminished lung iBALT formation and the magnitude of lung  
299 parenchyma B cell expansion (Fig. 5c and Extended Fig. 5c). LT $\beta$ R-Ig injection did not affect  
300 splenic T<sub>FH</sub> responses, but significantly impaired influenza-specific lung T<sub>RH</sub> but not non-T<sub>RH</sub>  
301 responses (Fig. 5d). Thus, these data indicate that lung tissue B cells and iBALT formation is  
302 required for the optimal generation of lung T<sub>RH</sub> responses.

303

## 304 **Optimal T<sub>RH</sub> responses depend on both T<sub>FH</sub> and T<sub>RM</sub> transcription factors**

305 We next sought to investigate the molecular mechanisms regulating lung T<sub>RH</sub> cell development  
306 following influenza virus infection. We first examined whether lung T<sub>RH</sub> cell development is  
307 dependent on the master transcription factor of T<sub>FH</sub> cells, BCL6<sup>61,62</sup>. To do so, we infected WT  
308 (*Bcl6*<sup>fl/fl</sup>) or *Bcl6*<sup>AT</sup> mice with PR8 virus and examined total and influenza-specific T<sub>RH</sub> or non-  
309 T<sub>RH</sub> cells in the lung tissue at 28 d.p.i. We found that T cell-specific BCL6 deficiency greatly  
310 diminished both the frequencies and the magnitude of lung T<sub>RH</sub> responses, but not those of non-

311 T<sub>RH</sub> responses (Fig. 6a-c). Consistent with the literatures <sup>57,63</sup>, T cell-specific BCL6 deficiency  
312 also diminished splenic T<sub>FH</sub> responses (Fig. 6d, e).

313

314 We have demonstrated before that Bhlhe40 is critical for the development of tissue-resident  
315 CD8<sup>+</sup> T cell responses <sup>55</sup>. Since lung T<sub>RH</sub> and non-T<sub>RH</sub> cells expressed high levels of *Bhlhe40*  
316 relative to splenic T<sub>FH</sub> cells (Fig 4a), we investigated the roles of Bhlhe40 in lung T<sub>RH</sub> responses  
317 relative to splenic T<sub>FH</sub> cells. Consistent with high Bhlhe40 expression in T<sub>RH</sub> cells, lung T<sub>RH</sub> cells  
318 were enriched with Bhlhe40-associated genes <sup>55</sup> compared to splenic T<sub>FH</sub> cells (Fig. 6f). We then  
319 infected WT (*Bhlhe40*<sup>fl/fl</sup>) or *Bhlhe40*<sup>ΔT</sup> mice with PR8 and examined total and influenza-specific  
320 T<sub>RH</sub> or non-T<sub>RH</sub> cells at 28 d.p.i. T cell-specific Bhlhe40 deficiency modestly increased the  
321 frequencies of T<sub>RH</sub> cells relative to non-T<sub>RH</sub> cells within the influenza-specific NP<sub>311-325</sub> CD4<sup>+</sup> T  
322 cell population, but not in the total lung CD4<sup>+</sup> T cell population (Fig. 6g, h and Extended Fig. 5  
323 e). Bhlhe40-deficiency in T cells significantly diminished total and influenza-specific CD4<sup>+</sup> T  
324 cells in the lung tissue, but not in the spleen (Extended Fig. 5 f, g). These data suggest that  
325 Bhlhe40 is required for the establishment of the overall lung-resident CD4<sup>+</sup> T cell population  
326 following influenza infection, as was observed with the lung-resident CD8<sup>+</sup> T cells <sup>55</sup>. As the  
327 result, the magnitude of both T<sub>RH</sub> and non-T<sub>RH</sub> cells in the lungs were significantly decreased  
328 (Fig. 6i). In contrast, Bhlhe40 deficiency did not alter either the frequencies or the magnitude of  
329 the splenic T<sub>FH</sub> response (Fig. 6g-i and Extended 5 d, e). Previously, we have reported that  
330 Bhlhe40 is required for the survival CD8<sup>+</sup> T cells in non-lymphoid tissues <sup>55</sup>. Consistent with  
331 that observation, Bhlhe40 deficiency resulted in enhanced cellular apoptosis in both lung T<sub>RH</sub>  
332 and non-T<sub>RH</sub> cells (Fig. 6j, k). These data indicate that Bhlhe40 is likely not important for the  
333 acquisition of “T<sub>FH</sub>-like” features in T<sub>RH</sub> cells, but is vital in sustaining T<sub>RH</sub> cell survival in the  
334 respiratory mucosal tissues. Taken together, the optimal formation of lung T<sub>RH</sub> cells requires  
335 transcription factors involved in both T<sub>FH</sub> (BCL6) and T<sub>RM</sub> (Bhlhe40) development. Conversely,  
336 the formation of splenic T<sub>FH</sub> cells is dependent on BCL6 but not Bhlhe40, and the development  
337 of lung PD-1<sup>Low</sup>FR4<sup>Low</sup> cells (probably consist of conventional T<sub>RM</sub> cells) is dependent on  
338 Bhlhe40 but not BCL6.

339

#### 340 **T<sub>RH</sub> cells assist the formation of protective B<sub>GC</sub>, B<sub>RM</sub> and CD8<sup>+</sup> T<sub>RM</sub> responses**

341 We hypothesize that T<sub>RH</sub> cells are those cells mediating the effects of CD4<sup>+</sup> T cell help on lung

342 local B and CD8<sup>+</sup> T cells. Consistent with that hypothesis, T cell-specific BCL6 deficiency  
343 led to diminished iBALT formation, B<sub>GC</sub>, B<sub>RM</sub> and CD8<sup>+</sup> NP<sub>366-374</sub> T<sub>RM</sub> responses (Extended  
344 Fig. 6 a-d). Furthermore, T cell-specific Bhlhe40 deficiency also resulted in diminished lung  
345 tissue B cells, B<sub>RM</sub> and CD8<sup>+</sup> T<sub>RM</sub> responses, although it is possible that Bhlhe40 deficiency in  
346 CD8<sup>+</sup> T cells directly contribute to the diminished CD8<sup>+</sup> T<sub>RM</sub> phenotype in these mice as shown  
347 before<sup>55</sup> (Extended Fig. 6 e-g).

348

349 To specifically determine whether T<sub>RH</sub> cells are required for the development of memory B and  
350 CD8<sup>+</sup> T cells in the lungs, we generated CD4 T cell -specific inducible BCL6-deficient mice  
351 (*Bcl6*<sup>ACD4 ERT2</sup>). We first confirmed that tamoxifen treatment efficiently caused gene  
352 recombination in CD4<sup>+</sup> T cells, but only minimally in other lymphocytes in *Bcl6*<sup>ACD4 ERT2</sup> mice  
353 (Extended Fig. 7a-c). We then infected WT (*Bcl6*<sup>fl/fl</sup>) or *Bcl6*<sup>ACD4 ERT2</sup> mice with PR8 and  
354 inoculated tamoxifen daily from 12 to 16 d.p.i. (5X) to specifically ablate BCL6 in CD4<sup>+</sup> T cells  
355 following influenza infection (Fig. 7a). To exclude the contribution of lymphoid organ T<sub>FH</sub> cells  
356 in providing the “late” help to lung B and CD8<sup>+</sup> T cells, we treated the mice with FTY720 daily  
357 to block T and B cell migration starting at 11 d.p.i. At the lung, the magnitude of CD45<sub>i.v.</sub><sup>-</sup> CD4<sup>+</sup>,  
358 CD8<sup>+</sup> T and B cells was decreased in inducible BCL6 ablated group (Extended Fig. 7d). As with  
359 the constitutive BCL6 deficiency in T cells, inducible CD4<sup>+</sup> T cell-specific BCL6 ablation  
360 resulted in diminished T<sub>RH</sub> but not non-T<sub>RH</sub> responses in the lungs (Extended Fig. 7e). Strikingly,  
361 the ablation of lung T<sub>RH</sub> responses significantly diminished B<sub>GC</sub>, influenza HA-specific B<sub>RM</sub>  
362 (HA-B<sub>RM</sub>) and NP-specific B<sub>RM</sub> (NP-B<sub>RM</sub>) responses in the lungs (Fig. 7b-d). CD8<sup>+</sup> NP<sub>366-374</sub> T<sub>RM</sub>  
363 responses were also significantly impaired following T<sub>RH</sub> ablation (Fig. 7e). Together these data  
364 suggest that lung T<sub>RH</sub> cells are important in assisting the development of local B and CD8<sup>+</sup>  
365 memory responses *in situ* in the respiratory tract.

366

367 To examine the roles of T<sub>RH</sub> cells in the maintenance of lung tissue B and CD8<sup>+</sup> T cell responses,  
368 we treated WT or *Bcl6*<sup>ACD4 ERT2</sup> mice with tamoxifen starting from 21 to 25 d.p.i. to ablate T<sub>RH</sub>  
369 cell responses at the memory stage (Fig. 7f). We then examined B<sub>GC</sub>, B<sub>RM</sub> and CD8<sup>+</sup> T<sub>RM</sub>  
370 responses at 42 d.p.i. (Fig. 7g-j). T<sub>RH</sub> ablation at the memory stage did not lead to significant  
371 decrease of B<sub>RM</sub> magnitude, but significantly impaired B<sub>GC</sub> responses at 6 weeks post infection  
372 (Fig. 7g-i). These data suggest T<sub>RH</sub> cells help to program lung B<sub>RM</sub> cell development, but may

373 not be directly required for their maintenance at the memory stage. However, T<sub>RH</sub> cells are  
374 continuously needed for sustaining lung B<sub>GC</sub> responses (Fig. 7g). Notably, these data are  
375 consistent with the data showing that B<sub>GC</sub> responses are important for B<sub>RM</sub> cell development in  
376 the first three weeks, but may not significantly contribute to lung B<sub>RM</sub> cells after 20 d.p.i.<sup>5</sup>. T<sub>RH</sub>  
377 ablation at the memory stage also diminished CD8<sup>+</sup> NP<sub>366-374</sub> T<sub>RM</sub> responses, suggesting that lung  
378 T<sub>RH</sub> cells continuously provide “local help” for the maintenance of CD8<sup>+</sup> NP<sub>366-374</sub> T<sub>RM</sub> cells (Fig.  
379 7j). Taken together, our data suggest that T<sub>RH</sub> cells are vital for programming lung B<sub>RM</sub> cell  
380 development before 20 d.p.i., but are necessary for both the optimal development and  
381 maintenance of B<sub>GC</sub> and CD8<sup>+</sup> NP<sub>366-374</sub> T<sub>RM</sub> responses at the memory stage.

382

383 Previously, it was shown that lung memory B cells generated from local B<sub>GC</sub> cells harbored high  
384 portions of cross-reactive B cells following influenza X31 virus infection (H3N2 virus)<sup>14</sup>. To  
385 examine whether T<sub>RH</sub> cells help to generate those cross-reactive B<sub>RM</sub> cells, we infected WT or  
386 *Bcl6*<sup>ACD4ERT2</sup> mice with X31 virus and injected the mice with tamoxifen in the presence of  
387 FTY720 as in Extended Fig. 7a. We then checked X31 strain-specific HA-B<sub>RM</sub> and cross-reactive  
388 HA-B<sub>RM</sub> against H3N2 A/Uruguay/716/07 strain (Urg)<sup>14</sup> using flow cytometry. T<sub>RH</sub> ablation  
389 resulted in diminished strain-specific (X31 HA<sup>+</sup> and Urg HA<sup>-</sup>) and cross-reactive (both X31 HA<sup>+</sup>  
390 and Urg HA<sup>+</sup>) B<sub>RM</sub> responses (Fig. 7k), indicating potential roles of T<sub>RH</sub> cells in the development  
391 of both strain-specific and cross-reactive B cell immunity.

392

393 Since CD8<sup>+</sup> T<sub>RM</sub> (particularly NP<sub>366-374</sub> T<sub>RM</sub><sup>40</sup>) and possibly B<sub>RM</sub> cells are important in mediating  
394 host heterologous protection<sup>5</sup>, we next sought to determine whether the ablation of T<sub>RH</sub> cells  
395 impairs host protective immunity against heterologous virus infection. To do so, we employed a  
396 heterologous infection and challenge model in which X31 virus was used as the primary  
397 infection and lethal PR8 virus was used as secondary challenge<sup>55</sup>. PR8 and X31 viruses differ in  
398 the viral surface proteins but share internal viral proteins such as NP<sup>64</sup>. As such, CD8<sup>+</sup> T<sub>RM</sub> and  
399 possibly B<sub>RM</sub> cells against internal viral epitopes (mainly against viral NP protein) can provide  
400 heterologous protection<sup>5,40</sup>. We infected WT or *Bcl6*<sup>ACD4ERT2</sup> mice with X31 virus and treated  
401 the mice with tamoxifen. We confirmed that T<sub>RH</sub> ablation affects CD8 NP<sub>366-374</sub> T<sub>RM</sub>, B<sub>GC</sub> and  
402 B<sub>RM</sub> development in the X31 model at 35 d.p.i. (Extended Fig. 7f). We then re-challenged the  
403 mice with a lethal dose of PR8 in the presence of FTY720 to block the contribution of circulating

404 memory CD8<sup>+</sup> T and B cells at 42 d.p.i. (Fig. 7l). Close to 40% of *Bcl6*<sup>ACD4ERT2</sup> mice succumbed,  
405 while WT mice were fully protected with lethal PR8 infection (Fig. 7m). Thus, we conclude that  
406 T<sub>RH</sub> cells are required for the optimal protection against secondary heterologous infection, most  
407 likely through their help for the development of protective CD8 T<sub>RM</sub> and B<sub>RM</sub> response.

408

#### 409 **Identification of the factors mediating T<sub>RH</sub>-derived “local” help.**

410 We next sought to identify the underlying mechanisms by which T<sub>RH</sub> cells promote B cell and  
411 CD8<sup>+</sup> T<sub>RM</sub> immunity. As shown in Fig. 2, T<sub>RH</sub> cells expressed high levels of *Il21*. To identify the  
412 major IL-21-expressing cell types in the lung, IL-21-VFP reporter mice were infected with PR8  
413 and examined at 28 d.p.i. The vast majority of lung IL-21-VFP<sup>+</sup> cells were CD4<sup>+</sup> T cells (Fig. 8a).  
414 IL-21-VFP<sup>hi</sup> cells, which expressed the highest levels of IL-21 than those IL-21-VFP<sup>low</sup> cells  
415 (Extended Fig. 8a), were mainly T<sub>RH</sub> cells (Fig. 8b). Additionally, T cell-specific BCL6  
416 deficiency impaired *Il21* expression in the lungs (Extended Fig. 8b). These data suggest that T<sub>RH</sub>  
417 cells are the main IL-21 producers in the lungs following influenza virus infection.

418

419 Since IL-21 is an important cytokine that has been implicated in facilitating B<sub>GC</sub>, memory B and  
420 CD8<sup>+</sup> effector and memory T cell responses<sup>65</sup>, we blocked IL-21 signaling starting at 14 d.p.i.  
421 through intraperitoneal injection of α-IL-21R in the presence of FTY720 (Fig. 8c). To our  
422 surprise, IL-21 signaling blockade did not impair B<sub>GC</sub> or influenza HA-specific B<sub>RM</sub> responses in  
423 the lung tissue (Fig. 8d, e). However, IL-21 signaling blockade significantly diminished CD8<sup>+</sup>  
424 NP<sub>366-374</sub> T<sub>RM</sub> responses, suggesting that T<sub>RH</sub> cells help CD8<sup>+</sup> T<sub>RM</sub> establishment and/or  
425 maintenance through IL-21 (Fig. 8f). We also blocked IL-21 signaling locally in the lung  
426 through intranasal delivery of α-IL-21R (Fig. 8g). Lung local blockade of IL-21 signaling  
427 diminished lung CD8<sup>+</sup> NP<sub>366-374</sub> T<sub>RM</sub> magnitude, but not splenic memory T cells (Fig. 8h, i).  
428 Local blockade of IL-21 signaling also did not affect B<sub>GC</sub> or HA-specific B cell responses in the  
429 lung parenchymal compartment (Extended Fig. 8c).

430

431 Consistent with the diminished CD8<sup>+</sup> NP<sub>366-374</sub> T<sub>RM</sub> responses, IL-21R signaling blockade led to  
432 enhanced cellular apoptosis but not proliferation, specifically in CD8<sup>+</sup> NP<sub>366-374</sub> T<sub>RM</sub> but not  
433 those of splenic memory T cells (Fig. 8j, k). Of note, compared to CD8<sup>+</sup> PA<sub>224-233</sub> T<sub>RM</sub> cells,  
434 CD8<sup>+</sup> NP<sub>366-374</sub> T<sub>RM</sub> cells exhibited higher expression of genes associated with IL-21 signaling



435 including *Batf* (Extended Fig. 8d, e)<sup>66</sup>. These data suggest that CD8<sup>+</sup> NP<sub>366-374</sub> T<sub>RM</sub> cells, but not  
436 CD8<sup>+</sup> PA<sub>224-233</sub> T<sub>RM</sub> cells, potentially receive IL-21 signaling in the lungs at the memory stage  
437 following influenza virus infection. Consistent with the data, we found that IL-21R blockade  
438 diminished BATF expression in CD8<sup>+</sup> NP<sub>366-374</sub> T<sub>RM</sub>, but not CD8<sup>+</sup> PA<sub>224-233</sub> T<sub>RM</sub> cells at 35 d.p.i.  
439 (Fig. 8l). Taken together, these data suggest T<sub>RH</sub> cells provide local help for the development of  
440 CD8<sup>+</sup> NP<sub>366-374</sub> T<sub>RM</sub> cells in an IL-21-dependent manner.

441  
442 CD40-CD40L interaction is critical for T cell help of B<sub>GC</sub> cell responses<sup>5, 57</sup>. Previously, it was  
443 shown that lung B<sub>GC</sub> cells contributed to lung local B<sub>RM</sub> cell responses<sup>14</sup>. Furthermore,  
444 diminished B<sub>GC</sub> response following CD40L blockade can lead to impaired B<sub>RM</sub> formation when  
445  $\alpha$ -CD40L was given before 20 d.p.i., although it is unknown whether this is due to diminished  
446 lung or circulating B<sub>GC</sub> responses<sup>5</sup>. Lung influenza-specific T<sub>RH</sub> cells express higher levels of  
447 CD40L than non-T<sub>RH</sub> cells (Fig. 8m and Extended Fig. 8f). To determine whether CD40L  
448 promotes lung B<sub>GC</sub> responses to facilitate local B<sub>RM</sub> formation following influenza infection, we  
449 inoculated  $\alpha$ -CD40L into PR8-infected mice at 14 d.p.i. in the presence of FTY720 as of Fig. 8c.  
450 As shown in Fig. 8n and o, CD40L blockade greatly diminished lung B<sub>GC</sub> formation and the  
451 magnitude of HA-specific B<sub>RM</sub> responses in the lung tissue. These data indicate that T<sub>RH</sub> cells  
452 facilitate B<sub>GC</sub> and B<sub>RM</sub> responses through CD40L-dependent mechanisms.

453  
454  
455  
456  
457  
458  
459  
460  
461  
462  
463  
464  
465



## 466 Discussion

467 In this report, we have discovered a previously unrecognized requirement for “*in situ*” CD4<sup>+</sup> T  
468 cell help in the respiratory mucosa, which is mediated by what we have termed T<sub>RH</sub> cells, in the  
469 development of localized protective memory responses following influenza virus infection. T<sub>RH</sub>  
470 cells co-manifest phenotypic and transcriptional hallmarks of both T<sub>FH</sub> and T<sub>RM</sub> cells. We have  
471 further identified the cellular and molecular mechanisms guiding the development of T<sub>RH</sub> cells,  
472 and key factors mediating their helper function to B and CD8<sup>+</sup> T cells (Extended Fig. 8g).

473  
474 The expression of T<sub>FH</sub>-associated molecules by T<sub>RH</sub> cells appear to be lower compared to those  
475 of splenic T<sub>FH</sub> cells (such as BCL6 and CXCR5). These PD-1<sup>Hi</sup> CXCR5<sup>Low</sup> BCL6<sup>Int</sup> T<sub>FH</sub>-like  
476 cells have been previously observed<sup>34, 35, 36, 37, 38</sup>. However, the cellular identity and  
477 developmental cues regulating their development remain largely elusive. Furthermore, the  
478 physiological function of these cells beyond their help on the generation of B<sub>GC</sub> cells are  
479 currently unknown. Using total and single cell transcriptional profiling and phenotypic analysis  
480 combined with parabiosis, we have identified that these tissue T<sub>FH</sub>-like cells exhibit enhanced  
481 expression of molecules-associated with peripheral migration and tissue residency, and show  
482 limited circulating ability. We therefore term these cells as T<sub>RH</sub> cells based on their  
483 transcriptional signature, non-migratory features and helper function. Currently, the cellular  
484 origins of these T<sub>RH</sub> cells are not determined in this study. T cell priming occur in the draining  
485 lymph nodes and it is possible that T<sub>RH</sub> cells originate from those lymph node pre-T<sub>FH</sub> or  
486 interfollicular T<sub>FH</sub> cells (T<sub>FH</sub> precursors outside the GC<sup>67, 68</sup>) entering circulation and adopting  
487 T<sub>RM</sub> signatures following entry in the lung parenchymal environment. Conversely, it is also  
488 possible that T<sub>RH</sub> cells develop from Th1-polarized cells and adopt “T<sub>FH</sub>-like” features in the  
489 iBALT structure when interacting with B cells. These possibilities of T<sub>RH</sub> cell development  
490 warrant further investigation. Nevertheless, based on the T<sub>RH</sub> transcriptional profiles and the dual  
491 requirement of BCL6 and Bhlhe40 for their formation, we believe that T<sub>RH</sub> cells are likely a  
492 “hybrid” of T<sub>FH</sub> and T<sub>RM</sub> cells, and may represent a unique population present in various tertiary  
493 lymphoid structures of mucosal tissues.

494  
495 Lung T<sub>RH</sub> cells appear to be required for programing localized memory B and T cell responses in  
496 the respiratory mucosal tissue. Previously, it was shown that locally-generated lung B<sub>GC</sub> cells

497 contribute significantly to the lung B<sub>RM</sub> cell pool following influenza virus infection<sup>14</sup>. Thus,  
498 T<sub>RH</sub> cells assist the development of B<sub>RM</sub> responses likely due to their help for the generation of  
499 lung B<sub>GC</sub> cells, rather than their direct “help” on lung B<sub>RM</sub> cells per se for their differentiation  
500 and/or maintenance. Consistent with this idea, the ablation of T<sub>RH</sub> cells around 4 weeks post  
501 infection did not significantly impact lung B<sub>RM</sub> cell maintenance. In accordance, the inoculation  
502 of CD40L Ab after 3 weeks of infection, which blocked the generation of lung B<sub>GC</sub> cells, fails to  
503 impact B<sub>RM</sub> cell generation<sup>5</sup>. These data suggest that localized B<sub>GC</sub> responses in the iBALT,  
504 programmed by lung T<sub>RH</sub> cells in the first three weeks of infection, facilitate B<sub>RM</sub> development  
505 following influenza virus infection.

506

507 Beyond their help to B cells, T<sub>RH</sub> cells are required for the optimal responses of a protective  
508 CD8<sup>+</sup> T<sub>RM</sub> population, most likely through the production of IL-21. Of note, it was previously  
509 shown that continuous CD4<sup>+</sup> T cell help beyond T cell priming was not required for the  
510 differentiation of CD103<sup>+</sup> CD8<sup>+</sup> T<sub>RM</sub> cells<sup>30</sup>. Consistently, we found that CD4<sup>+</sup> T cell depletion  
511 following the resolution of primary infection did not impact CD103 expression by CD8<sup>+</sup> T<sub>RM</sub>  
512 cells. However, persistent “late” help following viral clearance is required for the generation  
513 and/or the maintenance of a protective lung T<sub>RM</sub> population in our study. The timing of CD4<sup>+</sup> T  
514 cell depletion (day 7 previously<sup>30</sup> versus day 14 CD4<sup>+</sup> T cell depletion used here) likely explains  
515 the differences observed in the two models. It is possible that early depletion of CD4<sup>+</sup> T cells  
516 before viral clearance (i.e. day 7) alters lung viral and/or inflammatory environment, which  
517 compensate the requirement of lung CD4<sup>+</sup> T cells for CD8<sup>+</sup> T<sub>RM</sub> programming and/or  
518 maintenance. Other possibilities, including infection schemes and the levels of CD4<sup>+</sup> T cell  
519 depletion following  $\alpha$ -CD4 inoculation may also contribute to the differences observed.  
520 Nevertheless, using multiple lines of approaches including high or low doses of  $\alpha$ -CD4 depletion,  
521 inducible CD4<sup>+</sup> T cell-specific BCL6 ablation and IL-21 blockade combined with long-term  
522 FTY720 treatment, we have provided comprehensive evidence that localized CD4<sup>+</sup> T cell help,  
523 mediated by T<sub>RH</sub> cells and IL-21, is required for the optimal generation of a population of  
524 protective T<sub>RM</sub> cells (H2D<sup>b</sup>-restricted NP<sub>366-374</sub> T<sub>RM</sub> cells) following the resolution of primary  
525 infection.

526

527 Then, the question is why lung  $T_{RH}$  help, in the form of IL-21 provision, is specifically required  
528 for  $CD8^+$   $NP_{366-374}$   $T_{RM}$  responses. We have shown previously that  $CD8^+$   $NP_{366-374}$   $T_{RM}$  cells  
529 receive constant antigen engagement in the lungs at the memory stage due to the chronic  
530 deposition of high levels of influenza NP antigen<sup>40</sup>. Compared to conventional  $CD8^+$   $PA_{224-233}$   
531  $T_{RM}$  cells,  $CD8^+$   $NP_{366-374}$   $T_{RM}$  cells express high levels of PD-1 and exhibit “exhausted-like”  
532 phenotypes similar to those of T cells receiving chronic antigen exposure during chronic viral  
533 infections<sup>40, 69, 70</sup>. Consequently, the maintenance of these  $T_{RM}$  cells requires persistent MHC I-  
534 dependent stimulation at the memory stage<sup>40</sup>, similar to those of exhausted  $CD8^+$  T cells<sup>69</sup>.  
535 Notably,  $CD4^+$  T cell help in the form of IL-21 has been recently demonstrated to sustain those  
536 PD-1-expressing  $CD8^+$  T cells during chronic viral infection and tumor growth<sup>71</sup>. Thus,  $CD4^+$  T  
537 cell help and IL-21 signaling may be specifically required for maintaining the survival of lung  
538  $CD8^+$   $T_{RM}$  cells receiving persistent low levels of *in situ* antigenic stimulation. Consistent with  
539 this idea,  $NP_{366-374}$   $T_{RM}$  cells express higher levels of molecules associated with IL-21 signaling,  
540 particularly BATF.

541  
542 Influenza virus is able to undergo antigenic shift, drift and re-assortment to escape previously  
543 established host immunity. Current influenza vaccines require yearly update and only provide  
544 high levels of protection when influenza vaccine strains match exactly with the circulating  
545 strains. Much of attention has been given to the development of potential universal influenza  
546 vaccines recently. The common goals of various universal influenza vaccine candidates are to  
547 induce broadly neutralizing influenza Ab, strong  $CD8^+$  memory T cell responses against  
548 conserved epitopes and/or high levels of localized lung-resident mucosal immunity that can  
549 restrict viral spreading early<sup>72, 73, 74, 75</sup>. Due to the high mutation rates of influenza viruses, it is  
550 conceivable that the induction of “all inclusive” immune responses, i.e. induction of strong both  
551 B and  $CD8^+$  T cell immunity in the mucosal tissue, may be required for the ultimate success of a  
552 universal influenza vaccine<sup>75</sup>. Due to the unique ability of  $T_{RH}$  cells in assisting local  $B_{RM}$  and  
553  $T_{RM}$  development, it is tempting to speculate that the specific promotion of  $T_{RH}$  cells may  
554 simultaneously promote both memory B and  $CD8^+$  T cell immunity in the respiratory tract  
555 during vaccination, thereby providing rapid cross-reactive protection against broad-spectrum  
556 viruses.

557

558 Acute influenza virus infection can lead to the development of chronic lung pathogenic sequelae  
559 <sup>40, 76</sup>. The roles of iBALT and T<sub>RH</sub> in the development of chronic lung conditions following  
560 influenza infection needs further investigations. Additionally, tertiary lymphoid (B/T) aggregates  
561 or iBALT-like structures have been observed in many chronic lung diseases including asthma,  
562 pulmonary fibrosis, COPD (Chronic obstructive pulmonary disease) etc <sup>77, 78, 79, 80</sup>. It was  
563 speculated that these tertiary lymphoid structures may play important roles in modulating the  
564 disease progression in those chronic lung conditions <sup>47, 79</sup>. T<sub>RH</sub> cells may therefore participate in  
565 the regulation of chronic lung disease development. Further, recent advances have suggested that  
566 the development of tertiary lymphoid structures consisting of CD4<sup>+</sup> T and B cell clusters inside  
567 tumor effectively predicts patient responses to checkpoint blockade (anti-PD-1 and/or anti-  
568 CTLA4) therapies <sup>81, 82, 83</sup>. Given the transcriptional similarity of T<sub>RM</sub> cells and tumor infiltrating  
569 lymphocytes (TILs) <sup>84</sup>, it is possible that those T<sub>FH</sub>-like cells present inside those tertiary  
570 lymphoid structures within tumor also exhibit tissue-resident signatures (i.e. T<sub>RH</sub>-like cells).  
571 Indeed, a previous report has suggested the development of CXCL13<sup>+</sup> (human T<sub>FH</sub> marker)  
572 BHLHE40<sup>+</sup> CD4<sup>+</sup> T cells are associated with enhanced responsibility to anti-PD therapy in  
573 colorectal cancer <sup>85</sup>. Thus, it is possible that T<sub>RH</sub>-like cells may also provide “*in situ*” help for  
574 the optimal generation and/or maintenance of anti-tumor CD8 TILs following checkpoint  
575 blockade.

576

577 In summary, our data have revealed a complex T-B interaction network that is programmed by  
578 lung T<sub>RH</sub> cells for the maintenance of protective local respiratory immunity following acute  
579 influenza virus infection. Moving forward, it is of substantial interest to dissect the mechanisms  
580 modulating the development of T<sub>RH</sub> cells and the precise function of T<sub>RH</sub> cells in assisting the  
581 development of local B and CD8 T cell immunity during infection, vaccination and possibly  
582 cancer.

583

584

585

586

587

588

## 589 **Materials and methods**

### 590 **Mice and influenza viral infection**

591 WT C57BL/6, CD45.1 and IL-21 VFP reporter mice were purchased from the Jackson  
592 Laboratory (JAX) and bred in-house. To generate CD45.1<sup>+</sup> and CD45.2<sup>+</sup> (CD45.1<sup>+</sup>/CD45.2<sup>+</sup>)  
593 mice, CD45.1 mice were crossed with C57BL/6 mice. *Bcl6*<sup>fl/fl</sup> were generated as previously  
594 reported<sup>63</sup>. *Bcl6*<sup>ΔT</sup> were generated by crossing with CD4-Cre transgenic. *Bcl6*<sup>ACD4ERT2</sup> were  
595 generated by crossing with CD4-ERT2 transgenic mice. *Bcl6*<sup>fl/fl</sup> or *Bcl6*<sup>ACD4ERT2</sup> mice were  
596 additionally crossed with Rosa26 LSL-YFP (JAX) mice for the determination of the efficiency of  
597 tamoxifen induced gene recombination. *Bhlhe40*<sup>fl/fl</sup> or *Bhlhe40*<sup>ΔT</sup> mice were generated as  
598 previously reported<sup>55</sup>. All animal protocols were approved by the Institutional Animal Care and  
599 Use Committees (IACUC) of the Mayo Clinic (Rochester, MN). Sex-matched and age-matched  
600 8- to 10-week-old mice of both sexes were used in the experiments. Influenza A/PR8/34 (~200  
601 pfu/mouse in the primary infection and ~1×10<sup>4</sup> pfu/mouse in the secondary infection) and  
602 Influenza A X31 (~800 pfu/mouse in the primary infection) were infected into the mice by  
603 intranasal (i.n.) under anesthesia as reported before<sup>42</sup>.

604

### 605 **Intravascular labeling with α-CD45 and preparation of lung cell suspension**

606 Mice were intravenously (i.v.) injected with 2 μg of α-CD45 (Clone: 30-F11) (Tonbo  
607 Biosciences) diluted in 300 μL of sterile PBS five minutes before sacrifice. To prepare single  
608 cells from lung tissue, lungs were cut into small pieces, digested with Type 2 Collagenase  
609 (Worthington Biochemical) and dissociated in 37°C for 30 min with Gentle-MACS (Miltenyi).  
610 Cells were further ground through 70μm cell strainer (Falcon) and washed with plain IMDM  
611 (Gibco). After red blood cell lysis, cells were centrifuged and re-suspended in cold FACS buffer  
612 (PBS, 2 mM EDTA, 2 % FBS, 0.09 % Sodium Azide) for flow cytometry analysis. Lung  
613 circulating immune cells are i.v. Ab<sup>+</sup> and lung tissue immune cells are defined by i.v. Ab<sup>-</sup>. Lung  
614 T<sub>RM</sub> cells were defined as CD45<sub>i.v.</sub><sup>-</sup>CD8<sup>+</sup>tetramer<sup>+</sup>CD69<sup>+</sup>. Lung B<sub>RM</sub> cells were defined as  
615 CD45<sub>i.v.</sub><sup>-</sup>B220<sup>+</sup>GL7<sup>-</sup>IgD<sup>-</sup>IgM<sup>-</sup>CD38<sup>+</sup>influenza B cell antigen (HA or NP)<sup>+</sup>.

616

### 617 **Antibody administration *in vivo***

618 Influenza infected WT mice were administrated with control IgG or various neutralizing or  
619 depleting Ab as described in the text. For CD4 T cell depletion with high dose of α-CD4, mice

620 were injected with 250 µg α-CD4 weekly (Clone: GK1.5, BioXCell) starting at 14 d.p.i. For  
621 circulating CD4 T cell depletion, mice were I.P. injected with 40 µg α-CD4 for the first dose  
622 followed with 10 µg α-CD4 weekly. For B cell depletion, mice were injected with 500 µg of α-  
623 CD20 (Clone: 5D2, Genentech). CD40L blockade or iBALT depletion were achieved by the  
624 injection of 250 µg of α-CD40L (Clone: MR-1, BioXCell) or 250 µg of LTβR-Ig weekly  
625 respectively. For systemic IL-21R blockade, 500 µg of α-IL21R (Clone: 4A9, BioXCell) was  
626 injected through I.P weekly starting at 14 d.p.i. For lung local IL-21R blockade, 50 µg of α-  
627 IL21R was injected through intranasal route (I.N.) weekly starting at 14 d.p.i. In some  
628 experiments, FTY720 (1 mg/kg) (Cayman) was administrated daily from 13 d.p.i. to block  
629 lymphocyte migration until mouse euthanasia.

630

### 631 **Tamoxifen treatment**

632 To induce gene recombination in *Bcl6<sup>ACD4ERT2</sup>* mice, tamoxifen (Sigma-Aldrich) was diluted in  
633 warm sunflower oil (Sigma-Aldrich) and daily treated via intraperitoneal route for 5 consecutive  
634 times. Each application was 2 mg per mouse.

635

### 636 **Flow cytometry analysis**

637 For cell surface staining, cells were incubated with the appropriate antibody cocktail with FACS  
638 buffer for 30 min at 4 °C dark condition. Then cells were washed with FACS buffer. For  
639 intracellular staining, cell suspensions were stained with indicated surface markers and then  
640 washed with FACS buffer. Cells were then fixed and permeabilized with either Perm Fix and  
641 Wash buffer (Biolegend, for cytokine staining) or the Foxp3 transcription factor staining buffer  
642 set (eBioscience, for KI-67, Foxp3, BATF and BCL6 staining) for 1 hour at room temperature  
643 (RT) in the dark. Cells were washed twice with Perm Wash buffer (Biolegend or eBioscience)  
644 and stained with indicating Abs for 1 hour at RT. After staining, cells were washed again with  
645 Perm Wash buffer before flow cytometry acquisition. FACS Abs were primarily purchased from  
646 Biolegend, BD Biosciences, eBioscience or Tonbo Biosciences. The clone number of those Abs  
647 are as follows: CD45 (Clone: 30-F11), CD45.1 (Clone: A20), CD45.2 (Clone: 104), CD4 (Clone:  
648 RM4-5), CD44 (Clone: IM7), PD-1 (Clone: 29F.1A12), FR4 (Clone: eBio12A5), GITR (Clone:  
649 DTA-1), B220 (Clone: RA3-6B2), FAS (Clone: SA367H8), GL7 (Clone: GL7), CD38 (Clone:  
650 90), IgD (Clone: 11-26c.2a), IgM (Clone: 11/41), CD8a (Clone: 53-6.7), CD69 (Clone: H1.2F3),

651 CD103 (Clone: 2E7), CXCR5 (Clone: SPRCL5), ICOS (Clone: 7E.17G9), P2RX7 (Clone: 1F11),  
652 CXCR6 (Clone: SA051D1), CD40L (Clone: MR1), BCL6 (Clone: K112-91), Foxp3 (Clone:  
653 3G3), BATF (Clone: S39-1060), Ki67 (Clone: SoLA15), Streptavidin, IFN- $\gamma$  (Clone: XMG1.2),  
654 IL-17 (Clone: TC11-18H10.1) and IL-4 (Clone: 11B11). The expression of Bhlhe40 was  
655 measured with Primeflow kit (Thermo Fisher Scientific). For CD40L staining, lung cells were  
656 pre-activated with 100 ng/mL of PMA and 1  $\mu$ g/mL of ionomycin (Sigma-Aldrich) for 3 hrs in  
657 the 37°C before CD40L surface staining. H-2D<sup>b</sup>-NP<sub>366-374</sub>, H-2D<sup>b</sup>-PA<sub>224-233</sub> and I-A<sup>b</sup>-NP<sub>311-325</sub>  
658 tetramers were obtained from the National Institutes of Health tetramer facility. After Ab  
659 staining, cells were acquired with an Attune NxT system (Life Technologies). Data analysis was  
660 performed by FlowJo software (Tree Star).

661

### 662 **B cell antigens**

663 Influenza PR8-HA protein was a gift from Dr. Michelle C. Crank (NIH). PR8-NP protein was  
664 purchased from Sino Biological. Purified antigens were biotinylated using an EZ-Link Sulfo-  
665 NHS-LCBiotinylation kit (Thermo Fisher Scientific) using a 1:1.3 M ratio of biotin to Ag. To  
666 make tetramers, biotinylated Ags were mixed with streptavidin-PE (PJ27S; ProZyme) at the  
667 ratio determined or at a 5 to 1 ratio using the biotin concentration provided by the manufacturer  
668 as described before<sup>86</sup>. Following a 30-min incubation on ice, unconjugated biotinylated Ag was  
669 often removed by several rounds of dilution and concentration using a 100 kDa Amicon Ultra  
670 (MilliporeSigma) or 300 kDa Nanosep centrifugal devices (Pall). Tetramers were stored at 1  $\mu$ M  
671 in 1 $\times$  DPBS at 4°C prior to use. H3N2 X31-HA conjugated with APC and H3N2 Urg (Uruguay)-  
672 HA conjugated with PE were reported before<sup>14</sup>.

673

### 674 **Apoptosis analysis**

675 Apoptosis of NP<sub>311-325</sub> T<sub>RH</sub>, non-T<sub>RH</sub> cells or lung NP<sub>366-374</sub> T<sub>RM</sub>, splenic NP<sub>366-374</sub> T<sub>MEM</sub> were  
676 assessed with CellEvent™ Caspase-3/7 Green Flow Cytometry Assay kit (ThermoFisher). Lung  
677 single cells were stained with surface markers then incubated with caspase 3/7 green detection  
678 reagent for 30 minutes at 37°C as described in the manufacturer's instructions. Caspase 3/7  
679 Flica activities were analyzed flow cytometry.

680

### 681 **Immunohistochemistry and immunofluorescence**



682 Left lobe of whole lungs was harvested and fixed in 10% formaldehyde (Fisher Scientific) until  
683 embedding. Fixed lung tissues were embedded in paraffin, sectioned at 10- $\mu$ m thickness. To  
684 identify tertial lymphoid structure, the lung tissue slide was stained with hematoxylin and eosin  
685 by the Mayo Clinic Histology Core Laboratory (Scottsdale, AZ). To measured inducible  
686 bronchus-associated lymphoid tissues (iBALT) structure, lung tissue sections were  
687 deparaffinized in CitriSolv (Fisher Scientific) for 30 min and then immersed in ethanol series  
688 from 100, 95, 85, and 75% to distill H<sub>2</sub>O for 5 min each for tissue hydration. For antigen  
689 retrieval, hydrated sections were steamed for 20 min in 1 mM EDTA (pH 8.0). For detecting, IL-  
690 21 expressing CD4<sup>+</sup> T cells in iBALT, left lobe of lungs from influenza infected-IL21-VFP  
691 reporter mice were harvested and fixed for overnight at room temperature in 4%  
692 paraformaldehyde (PFA). The tissues were incubated in 10% sucrose for overnight, then  
693 incubated in 30% sucrose before being embedded in OCT compound and cryosectioned. The  
694 frozen sections were fixed with cold acetone for 20 min. Lung sections were blocked with Super  
695 Block Blocking buffer (Fisher Scientific) for 1 hr at RT. Anti-B220-eflour660 (Clone: 4SM95,  
696 Invitrogen), -CD4-eflour570 (Clone: RA3-6B2, Invitrogen), -GL7-Alexa488 (Clone: GL7,  
697 Biologend) and/or -GFP-Alexa488 (Clone: FM264G) were stained on the lung tissue sections for  
698 overnight at 4°C. After washing in 0.1% PBST (PBS with Tween 20), the slides were  
699 counterstained with 4', 6-diaminodino-2-phenylindole (DAPI) and mounted. Tissue staining was  
700 reviewed and representative images were acquired on a Zeiss LSM 780 confocal system (Carl  
701 Zeiss).

702

### 703 **Quantitative RT-PCR**

704 Total RNA was extracted from lung tissue or sorted cells as indicated in the text with Total RNA  
705 purification kit (Sigma) and treated with DNase I (Invitrogen). Random primers (Invitrogen) and  
706 MMLV reverse transcriptase (Invitrogen) were used to synthesize first-strand cDNAs from  
707 equivalent amounts of RNA from each sample. These cDNA was subjected to realtime-PCR with  
708 Fast SYBR Green PCR Master Mix (Applied Biosystems). Realtime-PCR was conducted in  
709 duplicates in QuantStudio3 (AppliedBioscience). Data were generated with the comparative  
710 threshold cycle (Delta CT) method by normalizing to hypoxanthine phosphoribosyltransferase  
711 (HPRT). Sequences of primers used in the studies are listed as following. *Hprt*-F:

712 CTCCGCCGGCTTCCTCCTCA, *Hprt*-R: ACCTGGTTCATCATCGCTAATC. *I121*-F:  
713 CGCTCACGAATGCAGGAGTA, *I121*-R: GTCTGTGCAGGGAACCACAA.

714

### 715 **Parabiosis surgery**

716 To examine tissue residency of lung T<sub>RH</sub> or non-T<sub>RH</sub> cells, parabiotic surgery was performed.  
717 CD45.1<sup>+</sup> or CD45.1<sup>+</sup>/CD45.2<sup>+</sup> mice were infected with influenza PR8. 3 weeks later, mice were  
718 anesthetized with ketamine and xylazine and shaved in lateral skin area. After disinfection,  
719 shaved skin area was made an incision then matched from the olecranon to the knee joint of each  
720 mouse. Matching area was opposed with continuous sutures. Parabionts were then allowed to  
721 rest for 14 d before analysis. Equilibration of parabionts was confirmed in the peripheral blood  
722 before tissue analysis.

723

### 724 **Nanostring analysis**

725 To perform nanostring analysis, influenza-specific lung CD8 T<sub>RM</sub>, splenic T<sub>MEM</sub>, lung T<sub>RH</sub>, lung  
726 non-T<sub>RH</sub> and splenic T<sub>FH</sub> cells were sorted as indicated in the text. Total RNA was extracted from  
727 sorted T cell populations with mini RNA-easy Kit (Qiagen). Equal amounts of total RNA from  
728 different groups were used for the assay. Hybridization reaction was established by following the  
729 instruction of the manufacturer. Aliquots of Reporter CodeSet and Capture ProbeSet were  
730 thawed at RT. Then, a master mix was created by adding 70 µl of hybridization buffer to the tube  
731 containing the reporter codeset. Eight microliters of this master mix was added to each of the  
732 tubes for different samples; 5 µl (50 ng) of the total RNA sample was added into each tube. Then,  
733 2 µl of the well-mixed Capture probeset was added to each tube and placed in the preheated  
734 65°C thermal cycler. All the sample mixes were incubated for 16 hours at 65°C for completion  
735 of hybridization. The samples were then loaded into the sample hole in the cartridge and loaded  
736 into the NanoString nCounter SPRINT Profiler machine (NanoString). When the corresponding  
737 Reporter Library File (RLF) running is finished, the raw data were downloaded and analyzed  
738 with NanoString Software nSolver 3.0 (NanoString). mRNA counts were processed to account  
739 for hybridization efficiency, background noise, and sample content, and were normalized using  
740 the geometric mean of housekeeping genes. All data were normalized by housekeeping genes.  
741 Heat map was generated by MeV software.

742

## 743 **Single-cell RNA sequencing**

744 Sorted CD45<sub>i.v.</sub><sup>-</sup>CD4<sup>+</sup>CD44<sup>Hi</sup> T cells from pooled lung cells of mice (5 mice) infected with  
745 influenza virus (28 d.p.i.) were loaded on the Chromium Controller (10x Genomics). Single-cell  
746 libraries were prepared using the Chromium Single Cell 3' Reagent kit (10x Genomics)  
747 following manufacturer's instruction. Paired-end sequencing was performed using an Illumina  
748 HiSeq 2500 in rapid-run mode. CellRanger software package (10x Genomics) were used to align  
749 and quantify sequencing data from 10x Genomics. All scRNA-seq analyses were performed in R  
750 using the package Seurat (version 2.0) <sup>87</sup>.

751

## 752 **Total RNA-sequencing**

753 Lung CD45<sub>i.v.</sub><sup>-</sup>CD4<sup>+</sup>CD44<sup>Hi</sup>GITR<sup>-</sup>PD-1<sup>Hi</sup>FR4<sup>Hi</sup>, CD45<sub>i.v.</sub><sup>-</sup>CD4<sup>+</sup>CD44<sup>Hi</sup>GITR<sup>-</sup>PD-1<sup>Low</sup>FR4<sup>Low</sup>,  
754 splenic CD4<sup>+</sup>CD44<sup>Hi</sup>GITR<sup>-</sup>PD-1<sup>Hi</sup> CXCR5<sup>+</sup> T<sub>FH</sub> or splenic CD4<sup>+</sup>CD44<sup>Hi</sup>GITR<sup>-</sup>PD-1<sup>low</sup> CXCR5<sup>-</sup>  
755 non-T<sub>FH</sub> cells were sorted from total of 15 mice that were infected with influenza virus (28 d.p.i.).  
756 RNA was extracted using RNeasy Plus Mini Kit (Qiagen) following the manufacture's  
757 recommendation. After quality control, high quality (Agilent Bioanalyzer RIN >7.0) total RNA  
758 was used to generate the RNA sequencing library. cDNA synthesis, end-repair, A-base addition,  
759 and ligation of the Illumina indexed adapters were performed according to the TruSeq RNA  
760 Sample Prep Kit v2 (Illumina, San Diego, CA). The concentration and size distribution of the  
761 completed libraries was determined using an Agilent Bioanalyzer DNA 1000 chip (Santa Clara,  
762 CA) and Qubit fluorometry (Invitrogen, Carlsbad, CA). Paired-end libraries were sequenced on  
763 an Illumina HiSeq 4000 following Illumina's standard protocol using the Illumina cBot and  
764 HiSeq 3000/4000 PE Cluster Kit. Base-calling was performed using Illumina's RTA software  
765 (version 2.5.2). Paired-end RNA-seq reads were aligned to the mouse reference genome  
766 (GRCm38/mm10) using RNA-seq spliced read mapper Tophat2 (v2.1.1). Pre- and post-  
767 alignment quality controls, gene level raw read count and normalized read count (i.e. FPKM)  
768 were performed using RSeQC package (v2.3.6) with NCBI mouse RefSeq gene model. For  
769 functional analysis, GSEA was used to identify enriched gene sets, from the hallmark collection  
770 of MSigDB, having up-regulated and down-regulated genes, using a weighted enrichment  
771 statistic and a log<sub>2</sub> ratio metric for ranking genes.

772

## 773 **Quantification and Statistical Analysis**

774 Statistical analysis was done using GraphPad Prism 7.0 (GraphPad Software) and presented as  
775 means  $\pm$  SEM. Unpaired or paired Student t tests and one-way or two-way ANOVA analysis  
776 were used in data analysis. Logrank test was used for analysis of survival study.

777

### 778 **Acknowledgements**

779 We thank NIH tetramer core for tetramers and Mayo flow cytometry core for technical  
780 assistance. We thank Genetech for  $\alpha$ -CD20 and Drs. Barney Graham and Michelle Crank for  
781 PR8 HA protein used in this study. This study was funded by the US National Institutes of  
782 Health RO1s AI112844, AI147394 and AG047156 (J.S.), R01 AI125741 and RO1 AI148403  
783 (W.C.) and R01 AI057459 (M.H.K.).

784

785

786

787

788

789

790

791

792

793

794

795

796

797

798

799

800

801

802

803

804 **Figure Legends:**

805 **Fig. 1 | Lung CD4<sup>+</sup> T cells deliver localized help for the development of tissue-resident B**  
806 **and CD8<sup>+</sup> T cells.**

807 **a-e**, WT mice were infected with PR8 strain of influenza virus and treated with control (ctl) IgG  
808 or  $\alpha$ -CD4 starting at 14 d.p.i. Mice were injected with  $\alpha$ -CD45 intravenously (i.v.) 5 min before  
809 sacrifice at 42 d.p.i. **a**, Experimental scheme. **b**, Representative confocal images of iBALT in the  
810 lung. Lung sections were stained with  $\alpha$ -CD4 (red),  $\alpha$ -B220 (green) and DAPI (blue). **c**,  
811 Frequencies and cell number of influenza HA-specific B cells (HA-B) in the lung tissue  
812 (CD45<sub>i.v.</sub><sup>-</sup>B220<sup>+</sup>GL7<sup>+</sup>HA<sup>+</sup>), lung blood vessels (CD45<sub>i.v.</sub><sup>+</sup>B220<sup>+</sup>GL7<sup>+</sup>HA<sup>+</sup>) and spleen  
813 (B220<sup>+</sup>GL7<sup>+</sup>HA<sup>+</sup>). **d**, Lung tissue CD8<sup>+</sup>, CD8<sup>+</sup>CD69<sup>+</sup> or CD8<sup>+</sup>CD69<sup>+</sup>CD103<sup>+</sup>NP<sub>366-374</sub> or PA<sub>224-</sub>  
814 <sub>233</sub> T<sub>RM</sub> cells were enumerated. **e**, Splenic CD8<sup>+</sup> NP<sub>366-374</sub> or PA<sub>224-233</sub> memory cells (T<sub>MEM-SPL</sub>)  
815 were enumerated. **f-j**, WT mice were infected with PR8 and treated with ctrl IgG or  $\alpha$ -CD4  
816 (starting at 14 d.p.i.) in the presence of daily injection of FTY-720 (starting at 13 d.p.i.). **f**,  
817 Schematic of experimental design. **g**, B<sub>GC</sub> cell numbers were enumerated by flow cytometry. **h**, **i**,  
818 Total HA-specific B cells (total HA-B) (**h**) or HA-specific tissue-resident memory B cells (HA-  
819 B<sub>RM</sub>: CD45<sub>i.v.</sub><sup>-</sup>B220<sup>+</sup>GL7<sup>+</sup>IgD<sup>-</sup>IgM<sup>-</sup>HA<sup>+</sup>CD38<sup>+</sup>) (**i**) were enumerated. **j**, Lung tissue CD8<sup>+</sup>,  
820 CD8<sup>+</sup>CD69<sup>+</sup> or CD8<sup>+</sup>CD69<sup>+</sup>CD103<sup>+</sup>NP<sub>366-374</sub> or PA<sub>224-233</sub> T<sub>RM</sub> cells were enumerated. **k-n**, WT  
821 mice were infected with PR8 and received ctrl IgG, high or low dose of  $\alpha$ -CD4. Cell number of  
822 B<sub>GC</sub> (**k**), HA-specific B<sub>RM</sub> (**l**) and NP-specific B<sub>RM</sub> cells (**m**) in the lung tissue. **n**, Lung tissue  
823 CD8<sup>+</sup>, CD8<sup>+</sup>CD69<sup>+</sup> or CD8<sup>+</sup>CD69<sup>+</sup>CD103<sup>+</sup>NP<sub>366-374</sub> T<sub>RM</sub> cells were enumerated. In **b-e** were the  
824 representative data from at least two independent experiments (4-5 mice per group). In **g-h** and  
825 **j-n**, data were pooled from two (**g**, **h** and **j**) or three (**k-n**) independent experiments (2-5 mice per  
826 group). *P* values were calculated by unpaired two-tailed Student's t-test in c-j. *P* values in k-n  
827 were analyzed by one-way ANOVA.

828

829 **Fig. 2 | Identification of a population of T<sub>FH</sub>-like cells in the lung tissue.**

830 WT (**a-e**) or IL-21-VFP reporter (**f**) mice were infected with PR8. **a**, tSNE plot of scRNAseq  
831 analysis of sorted lung CD45<sub>i.v.</sub><sup>-</sup>CD4<sup>+</sup>CD44<sup>Hi</sup> cells (pooled from 5 mice) at 28 d.p.i. **b**, Heat map  
832 of indicated genes in each cluster from scRNAseq data. **c**, Kinetics of the percentages of PD-  
833 1<sup>Hi</sup>FR4<sup>Hi</sup> population in lung tissue total CD4<sup>+</sup> or influenza NP-specific (NP<sub>311-325</sub>) CD4<sup>+</sup> T cells.  
834 **d**, Expression of T<sub>FH</sub> cell-associated markers in lung total or influenza-specific PD-1<sup>Hi</sup>FR4<sup>Hi</sup>, PD-

835  $1^{\text{Low}}\text{FR4}^{\text{Low}}$  or splenic  $\text{T}_{\text{FH}}$  ( $\text{CD4}^+\text{CD44}^{\text{Hi}}\text{PD-1}^+\text{CXCR5}^+$ ) cells at 28 d.p.i. **e**, Expression of IFN- $\gamma$ ,  
836 IL-17 or IL-4 by lung  $\text{PD-1}^{\text{Hi}}\text{FR4}^{\text{Hi}}$ ,  $\text{PD-1}^{\text{Low}}\text{FR4}^{\text{Low}}$  or spleen  $\text{T}_{\text{FH}}$  cells were identified by  
837 intracellular staining at 28 d.p.i. **f**, IL-21-VFP expression in lung  $\text{CD4}^+$   $\text{PD-1}^{\text{Hi}}\text{FR4}^{\text{Hi}}$ ,  $\text{PD-1}^{\text{Low}}\text{FR4}^{\text{Low}}$   
838 or spleen  $\text{T}_{\text{FH}}$  at 28 d.p.i. In **c-f**, representative plots, histograms and graphs were  
839 from at least two independent experiments (4 mice per group). *P* values in **e** and **f** were analyzed  
840 by one-way ANOVA.

841

842

843 **Fig. 3 | Transcriptional profiling reveals  $\text{PD-1}^{\text{Hi}}\text{FR4}^{\text{Hi}}$  cells exhibit both  $\text{T}_{\text{FH}}$  and  $\text{T}_{\text{RM}}$  gene**  
844 **signatures.**

845 **a-f**, WT mice were infected with PR8. Lung  $\text{PD-1}^{\text{Hi}}\text{FR4}^{\text{Hi}}$  or  $\text{PD-1}^{\text{Low}}\text{FR4}^{\text{Low}}$   $\text{CD4}^+$  T cells and  
846 splenic  $\text{T}_{\text{FH}}$  or non- $\text{T}_{\text{FH}}$  cells were sorted following exclusion of  $\text{GITR}^{\text{Hi}}$  Treg cells and RNA-seq  
847 analysis was performed at 28 d.p.i. **a**, Heatmap expression of differentially expressed genes  
848 among lung  $\text{PD-1}^{\text{Hi}}\text{FR4}^{\text{Hi}}$ ,  $\text{PD-1}^{\text{Low}}\text{FR4}^{\text{Low}}$   $\text{CD4}^+$  T cells and splenic  $\text{T}_{\text{FH}}$  or non- $\text{T}_{\text{FH}}$  cells. **b**,  
849 Principle component analysis of RNA-seq data of lung  $\text{PD-1}^{\text{Hi}}\text{FR4}^{\text{Hi}}$ ,  $\text{PD-1}^{\text{Low}}\text{FR4}^{\text{Low}}$   $\text{CD4}^+$  T  
850 cells and splenic  $\text{T}_{\text{FH}}$  or non- $\text{T}_{\text{FH}}$  cells. **c**, Volcano plot of RNA-seq analysis of lung  $\text{PD-1}^{\text{Hi}}\text{FR4}^{\text{Hi}}$   
851 or  $\text{PD-1}^{\text{Low}}\text{FR4}^{\text{Low}}$   $\text{CD4}^+$  T cells. **d**, GSEA of the core  $\text{T}_{\text{FH}}$  signature genes in lung  $\text{CD4}^+$   $\text{PD-1}^{\text{Hi}}\text{FR4}^{\text{Hi}}$   
852 and  $\text{CD4}^+$   $\text{PD-1}^{\text{Low}}\text{FR4}^{\text{Low}}$  cells. **e**, Volcano plot of RNA-seq analysis on lung  $\text{PD-1}^{\text{Hi}}\text{FR4}^{\text{Hi}}$   
853  $\text{CD4}^+$  T and splenic  $\text{T}_{\text{FH}}$  cells. **f**, GSEA of the core tissue-residency signature genes of  $\text{T}_{\text{RM}}$   
854 cells in lung  $\text{PD-1}^{\text{Hi}}\text{FR4}^{\text{Hi}}$  and splenic  $\text{T}_{\text{FH}}$  cells. **g-h**, WT mice were infected with PR8. Lung  
855  $\text{PD-1}^{\text{Hi}}\text{FR4}^{\text{Hi}}$  or  $\text{PD-1}^{\text{Low}}\text{FR4}^{\text{Low}}$   $\text{CD4}^+$  T cells and splenic  $\text{T}_{\text{FH}}$  cells were sorted at 28 d.p.i.  
856 Nanostring analysis on 560 immune-associated genes was performed. The expression of  $\text{T}_{\text{FH}}$ -  
857 associated genes (**g**) or tissue-residency associated genes (**h**) in the three cell populations was  
858 depicted. For RNA-seq, data were from duplicates of pooled samples ( $n = 15$ ). For nanostring  
859 analysis, data were from pooled samples ( $n = 10$ ).

860

861 **Fig. 4 | Lung  $\text{PD-1}^{\text{Hi}}\text{FR4}^{\text{Hi}}$  cells are tissue resident**

862 **a**, WT mice were infected with PR8. The expression of CD69, CXCR6 and *Bhlhe40* in lung  
863  $\text{CD4}^+$   $\text{PD-1}^{\text{Hi}}\text{FR4}^{\text{Hi}}$  or  $\text{CD4}^+$   $\text{PD-1}^{\text{Low}}\text{FR4}^{\text{Low}}$  NP<sub>311-325</sub> T cells or splenic  $\text{T}_{\text{FH}}$  cells at 28 d.p.i. **b-e**,  
864  $\text{CD45.1}^+$  (Host) or  $\text{CD45.1}^+$   $\text{CD45.2}^+$  (Partner) WT mice were infected with PR8. Parabiosis  
865 surgery was performed at 21 d.p.i. Mice were sacrificed 14 days later for analysis. **b**, Schematics

866 of parabiosis experiments. **c**, Composition of Host-derived or Partner-derived CD4<sup>+</sup> T cells in  
867 the spleens of the parabionts. **d**, Frequencies of Host-derived or Partner-derived cells in the lung  
868 PD-1<sup>Hi</sup>FR4<sup>Hi</sup> or PD-1<sup>Low</sup>FR4<sup>Low</sup> total CD4<sup>+</sup> T cell compartment. **e**, Frequencies of Host-derived  
869 or Partner-derived cells in influenza-specific lung CD4<sup>+</sup> PD-1<sup>Hi</sup>FR4<sup>Hi</sup> or CD4<sup>+</sup> PD-1<sup>Low</sup>FR4<sup>Low</sup>  
870 NP<sub>311-325</sub> T cell compartment. In **a**, the representative histograms were from at least two  
871 independent experiments (3-4 mice per group). Parabiosis data were pooled from two different  
872 experiments (two pairs per experiment). *P* values in **d** and **e** were analyzed by one-way ANOVA.  
873

### 874 **Fig. 5 | Optimal T<sub>RH</sub> formation requires lung B cells and iBALT formation**

875 WT (**a-d**) mice were infected with PR8 and treated with ctl IgG, α-CD20 (**b**) or LTβR-Ig (**c** and  
876 **d**) (weekly starting at 14 d.p.i.) in the presence of daily injection of FTY-720 (13-27 d.p.i.). **a**,  
877 Experimental scheme. **b** and **d**, Representative dot plot and cell numbers of influenza-specific  
878 NP<sub>311-325</sub> lung T<sub>RH</sub>, lung non-T<sub>RH</sub> or splenic T<sub>FH</sub> cells. **c**, Representative image from lung tissue  
879 section stained with B220/GL-7 following ctl IgG or LTβR-Ig treatment. In **c**, the representative  
880 image was from at least two independent experiments (3-4 mice per group). In **b**, representative  
881 data were from at least two independent experiments (4-5 mice per group). In **d**, data were  
882 pooled from two independent experiments (3-4 mice per group). *P* values were calculated by  
883 unpaired two-tailed Student's t-test.

884

### 885 **Fig. 6 | Both BCL6 and Bhlhe40 are required for optimal lung T<sub>RH</sub> responses.**

886 **a-e**, *Bcl6*<sup>fl/fl</sup> or *Bcl6*<sup>AT</sup> mice were infected with PR8. Representative dot plot (**a**), percentages (**b**)  
887 and cell numbers (**c**) of T<sub>RH</sub> or non-T<sub>RH</sub> in lung CD45<sup>i.v.</sup>- total CD4<sup>+</sup> or CD45<sup>i.v.</sup>- influenza-  
888 specific CD4<sup>+</sup> NP<sub>311-325</sub> T cells at 28 d.p.i. **d-e**, Representative dot plot (**d**) and percentage (top  
889 row) or cell numbers (bottom row) (**e**) of splenic total T<sub>FH</sub> or NP<sub>311-325</sub> T<sub>FH</sub> at 28 d.p.i. **f**, GSEA of  
890 the *Bhlhe40*-associated genes in lung T<sub>RH</sub> (PD-1<sup>Hi</sup>FR4<sup>Hi</sup>) and spleen T<sub>FH</sub> cells. **g-k**, *Bhlhe40*<sup>fl/fl</sup> or  
891 *Bhlhe40*<sup>AT</sup> mice were infected with PR8. **g-i**, Representative dot plot (**g**), percentages (**h**) or cell  
892 numbers (**i**) of influenza-specific NP<sub>311-325</sub> lung T<sub>RH</sub>, lung non-T<sub>RH</sub>, splenic T<sub>FH</sub> or splenic non-  
893 T<sub>FH</sub> cells at 28 d.p.i. **j-k** Representative dot plot (**j**) or percentages (**k**) of active caspase 3/7-  
894 FLICA<sup>+</sup> cells in lung NP<sub>311-325</sub> T<sub>RH</sub> or non-T<sub>RH</sub> cells at 28 d.p.i. In **a-e** and **g-i**, data were pooled  
895 from two independent experiments (3-4 mice per group). In **j-k**, representative data were from at



896 least two independent experiments (4 mice per group). *P* values were calculated by unpaired  
897 two-tailed Student's t-test.

898

899 **Fig. 7 |  $T_{RH}$  cells are required for the development of lung protective  $CD8^+$   $T_{RM}$  and B cell**  
900 **immunity.**

901 **a-j**, *Bcl6<sup>fl/fl</sup>* or *Bcl6<sup>ACD4ERT2</sup>* mice were infected with PR8. **a-e**, Tamoxifen was administrated  
902 daily from 12-16 d.p.i. in the presence of daily FTY720 administration (11-34 d.p.i.). **a**,  
903 Schematics of experimental design. Cell numbers of  $B_{GC}$  (**b**), HA-specific  $B_{RM}$  (**c**), NP-specific  
904  $B_{RM}$  (**d**), **e**,  $CD8^+CD69^+$  NP<sub>366-374</sub>  $T_{RM}$  or  $CD8^+CD69^+$  PA<sub>224-233</sub>  $T_{RM}$  at 35 d.p.i. **f-j**, Tamoxifen  
905 was administrated daily from 21-25 d.p.i. in the presence of daily FTY720 administration (20-41  
906 d.p.i.). **f**, Schematics of experimental design. Cell numbers of  $B_{GC}$  (**g**), HA-specific  $B_{RM}$  (**h**), NP-  
907 specific  $B_{RM}$  (**i**), **j**,  $CD8^+CD69^+$  NP<sub>366-374</sub>  $T_{RM}$  or  $CD8^+CD69^+$  PA<sub>224-233</sub>  $T_{RM}$  at 42 d.p.i. **k**, *Bcl6<sup>fl/fl</sup>*  
908 or *Bcl6<sup>ACD4ERT2</sup>* mice were infected with X31 strain (H3N2) of influenza. Tamoxifen was  
909 administrated daily from 12-16 d.p.i. in the presence of daily FTY720 administration (11-34  
910 d.p.i.). Representative dot plot (top) and cell numbers (bottom) of X31 strain-specific  $B_{RM}$  or  
911 cross-reactive HA-specific  $B_{RM}$  (to H3N2 A/Uruguay/716/07 strain) at 35 d.p.i. **l-m**, *Bcl6<sup>fl/fl</sup>* (*n* =  
912 11) or *Bcl6<sup>ACD4ERT2</sup>* (*n* = 15) mice were infected with X31 and administered with tamoxifen from  
913 12 to 16 d.p.i. Mice were re-challenged with PR8 at 42 d.p.i. in the presence of FTY720 (starting  
914 from 41d). **l**, Schematics of experimental design. **m**, Host mortality following PR8 challenge was  
915 monitored. In **a-h** and **j-k**, all data were pooled from two (**c**, **d**, **k**, **g**, **h** and **j**) or three (**b** and **e**)  
916 independent experiments (2-5 mice per group). In a-k, *P* values were calculated by unpaired  
917 two-tailed Student's t-test. *P* value of survival study in m was calculated by Logrank test.

918

919 **Fig. 8 | IL-21 or CD40L-dependent  $T_{RH}$  help to  $CD8^+$  or B cells.**

920 **a-b**, IL-21-VFP reporter mice were infected with PR8. **a**, IL-21-VFP expressing cells in the  
921 lungs or spleens were identified by flow cytometry at 28 d.p.i. **b**, Representative dot plot of IL-  
922 21<sup>Hi</sup> or IL-21<sup>Low</sup>  $CD4^+$  T cells that were PD-1<sup>Hi</sup>FR4<sup>Hi</sup>. **c-f**, WT mice were infected PR8 with or  
923 without IL-21R blockade through intraperitoneal (I.P.) route starting at 14 d.p.i. in the presence  
924 of FTY-720 administration (13-34 d.p.i.). **c**, Experimental scheme. Cell numbers of lung  
925 parenchymal  $B_{GC}$  (**d**), HA-specific  $B_{RM}$  (**e**) and  $CD8^+CD69^+$  NP<sub>366-374</sub> or  $CD8^+CD69^+$  PA<sub>224-233</sub>  
926  $T_{RM}$  cells (**f**). **g-k**, WT mice were infected with PR8 with or without IL-21R blockade through

927 intranasal (I.N.) route at 14 d.p.i. **g**, Experimental scheme. **h-i**, Frequencies (**h**) or cell numbers (**i**)  
928 of lung tissue CD8<sup>+</sup>CD69<sup>+</sup> NP<sub>366-374</sub>, CD8<sup>+</sup>CD69<sup>+</sup> PA<sub>224-233</sub> T<sub>RM</sub>, splenic CD8<sup>+</sup> NP<sub>366-374</sub> or PA<sub>224-</sub>  
929 <sub>233</sub> memory T cells (T<sub>MEM</sub>) at 42 d.p.i. **j**, Percentage of apoptotic cells were identified by active  
930 caspase 3/7-FLICA staining within lung CD8<sup>+</sup> NP<sub>366-374</sub> T<sub>RM</sub> or splenic CD8<sup>+</sup> NP<sub>366-374</sub> T<sub>MEM</sub> at 28  
931 d.p.i. **k**, percentages of proliferating cells were identified by Ki67 staining within lung CD8<sup>+</sup>  
932 NP<sub>366-374</sub> T<sub>RM</sub> or splenic CD8<sup>+</sup> NP<sub>366-374</sub> T<sub>MEM</sub> at 28 d.p.i. **l**, Representative histogram of BATF  
933 expression in lung CD8<sup>+</sup> NP<sub>366-374</sub> or CD8<sup>+</sup> PA<sub>224-233</sub> T<sub>RM</sub> of mice received with ctl IgG or α-  
934 IL21R at 35 d.p.i. **m**, Representative histogram of CD40L expression in influenza-specific lung  
935 T<sub>RH</sub> or non-T<sub>RH</sub> at 28 d.p.i. **n-o**, WT mice were infected with PR8 and received ctl IgG or α-  
936 CD40L weekly (I.P. route) starting at 14 d.p.i. in the presence of daily FTY-720 administration  
937 (13-34 d.p.i.). Representative dot plot or cell numbers B<sub>GC</sub> (**n**) and HA-specific B<sub>RM</sub> (**o**) cells at  
938 35 d.p.i. In **a-b and j-m**, representative data were from at least two independent experiments (4-  
939 5 mice per group). In **d, f-i and n-o**, data were pooled from two independent experiments (3-5  
940 mice per group). *P* values of all experiments were calculated by unpaired two-tailed Student's t-  
941 test.

942

943 **Extended Fig. 1 | “Late” CD4<sup>+</sup> T cell help shapes respiratory mucosal memory CD8<sup>+</sup> and B**  
944 **cell immunity.**

945 WT mice were infected with PR8 and treated with ctl IgG or α-CD4. **a**, The efficiency of CD4<sup>+</sup>  
946 T cell depletion in the lung or spleen. **b**, Representative image of lung section stained with H&E.  
947 Black arrows indicate tertial lymphoid structure. **c**, Representative dot plot and cell numbers of  
948 lung germinal center B (B<sub>GC</sub>) cells. **d**, Frequencies of lung circulating (CD45<sub>i.v.</sub><sup>+</sup>) or parenchymal  
949 (CD45<sub>i.v.</sub><sup>-</sup>) CD8<sup>+</sup> T or B cells in mice treated with control IgG or α-CD4. **e**, Influenza HA-  
950 specific B cells (HA-B) in the lungs were identified through HA antigen staining. **f**, Lung tissue  
951 or circulating CD8<sup>+</sup> NP<sub>366-374</sub> or PA<sub>224-233</sub> T cells were identified through CD45<sub>i.v.</sub> staining and  
952 analyzed by flow cytometry. **g**, Lung circulating CD8<sup>+</sup> NP<sub>366-374</sub> or CD8<sup>+</sup> PA<sub>224-233</sub> T cells were  
953 enumerated. **i**, Histogram of CD103 expression or frequency of CD103<sup>+</sup> cells within CD8<sup>+</sup>CD69<sup>+</sup>  
954 NP<sub>366-374</sub> T<sub>RM</sub> cells. **h, j**, Gating strategies of CD8<sup>+</sup> T<sub>RM</sub> (**h**) or B<sub>RM</sub> (**j**) cells in the lung.  
955 Representative data were from at least two independent experiments (4-5 mice per group). *P*  
956 values were calculated by unpaired two-tailed Student's t-test.

957

958 **Extended Fig. 2 | Lung “local” CD4 T cell help for the development robust memory CD8<sup>+</sup>**  
959 **and B cell immunity.**

960 WT mice were infected with influenza PR8 (**a**) or X31 (**b-e**) and treated with control IgG or  $\alpha$ -  
961 CD4 (starting at 14 d.p.i.) in the presence of daily FTY720 (starting at 13 d.p.i.).

962 **a**, Blood lymphocytes in the PBS or FTY720 administrated mice. **b-e**, Numbers of lung B<sub>GC</sub> cells  
963 (**b**), total HA specific B cells (**c**), HA-specific B<sub>RM</sub> (**d**), and total CD8<sup>+</sup> NP<sub>366-374</sub> memory T cells,  
964 CD8<sup>+</sup> CD69<sup>+</sup> NP<sub>366-374</sub> T<sub>RM</sub> or CD8<sup>+</sup> CD69<sup>+</sup> CD103<sup>+</sup> NP<sub>366-374</sub> T<sub>RM</sub> cells (**e**). **f-h**, WT mice were  
965 infected with PR8 and received with ctl IgG, low or high dose of  $\alpha$ -CD4 (starting at 14 d.p.i.).  
966 Experimental scheme (**f**), representative dot plot of blood lymphocyte population (**g**) and lung  
967 lymphocyte population (**h**). Representative data were from at least two independent experiments  
968 (4-5 mice per group). *P* values were calculated by unpaired two-tailed Student’s t-test.

969  
970

971 **Extended Fig. 3 | scRNA-seq identifies a population of lung T<sub>H</sub> cells exhibit T<sub>FH</sub> features.**

972 **a**, Heat map of signature genes following high-rank cluster analysis of scRNAseq data. **b**, 5  
973 clusters of lung T helper cells were identified following scRNA seq analysis. **c**, Violin plot of  
974 representative T<sub>H</sub> genes in each cluster.

975

976 **Extended Fig. 4 | Total RNA-seq identified PD-1<sup>Hi</sup>FR4<sup>Hi</sup> cells exhibits features of T<sub>FH</sub> and**  
977 **T<sub>RM</sub>.**

978 **a**, Cell sorting strategy for lung PD-1<sup>Hi</sup>FR4<sup>Hi</sup>, PD-1<sup>Low</sup>FR4<sup>Low</sup> population in the lungs. To exclude  
979 Foxp3<sup>+</sup> T<sub>reg</sub> cells, lung PD-1<sup>Hi</sup>FR4<sup>Hi</sup>, PD-1<sup>Low</sup>FR4<sup>Low</sup> cells were sorted from CD45<sub>i.v.</sub><sup>-</sup>CD4<sup>+</sup>GITR<sup>-</sup>  
980 CD44<sup>Hi</sup> population. **b**, Cluster analysis of signature genes in lung PD-1<sup>Hi</sup>FR4<sup>Hi</sup>, lung PD-  
981 1<sup>Low</sup>FR4<sup>Low</sup>, splenic T<sub>FH</sub> or splenic non-T<sub>FH</sub> cells. **c**, GSEA of lung PD-1<sup>Hi</sup>FR4<sup>Hi</sup> and lung PD-  
982 1<sup>Low</sup>FR4<sup>Low</sup> cells. **d**, GSEA of lung PD-1<sup>Hi</sup>FR4<sup>Hi</sup> and splenic T<sub>FH</sub> cells.

983

984 **Extended Fig. 5 | Impaired T<sub>RH</sub> responses following B cell depletion, iBALT disruption or**  
985 **Bhlhe40 deficiency.**

986 **a-c**, WT (**a** and **c**) or IL-21-VFP reporter (**b**) mice were infected with PR8 and received with ctl  
987 IgG,  $\alpha$ -CD20 or LT $\beta$ R-Ig weekly in the present of FTY-720 (Experimental scheme in Fig 5. a.).  
988 **a**, The efficiency of B cell depletion in the lung. **b**, Representative confocal images of IL-21-

989 expressing cells in iBALT. **c**, Cell numbers of lung tissue B cells in mice received with ctl-IgG  
990 or LT $\beta$ R-Ig. **d-g**, *Bhlhe40<sup>fl/fl</sup>* or *Bhlhe40<sup>AT</sup>* mice were infected with PR8. Representative dot plot  
991 (**d**), percentages (top) or cell numbers (bottom) (**e**) of total lung T<sub>RH</sub>, non-T<sub>RH</sub>, splenic T<sub>FH</sub> or  
992 splenic non-T<sub>FH</sub> at 28 d.p.i. **f**, Representative dot plot or cell numbers of lung tissue or splenic  
993 CD4<sup>+</sup> T cells at 28 d.p.i. **g**, Cell numbers of lung or splenic influenza- NP<sub>311-325</sub> CD4<sup>+</sup> T cell at 28  
994 d.p.i. Data were pooled from two independent experiments (3-4 mice per group). *P* value were  
995 calculated by unpaired two-tailed Student's t-test.

996

997 **Extended Fig. 6 | T cell-specific BCL6 or Bhlhe40 deficiency leads to impaired lung CD8<sup>+</sup>**  
998 **memory and B cell immunity.**

999 **a-d**, *Bcl6<sup>fl/fl</sup>* or *Bcl6<sup>AT</sup>* mice were infected with PR8. **a**, Representative confocal images of lung  
1000 iBALT at 28 d.p.i. Lung sections were stained with  $\alpha$ -CD4 (red),  $\alpha$ -B220 (green),  $\alpha$ -GL7 (white)  
1001 and DAPI (blue). Percentages of lung B<sub>GC</sub> (**b**), lung tissue HA-specific B<sub>RM</sub> or circulating HA-  
1002 specific B<sub>MEM</sub> (**c**) and CD8<sup>+</sup>CD69<sup>+</sup> NP<sub>366-374</sub>, or CD8<sup>+</sup>CD69<sup>+</sup> PA<sub>224-233</sub> T<sub>RM</sub> (**d**). **e-g**, *Bhlhe40<sup>fl/fl</sup>* or  
1003 *Bhlhe40<sup>AT</sup>* mice were infected with PR8. **e**, Representative dot plot or cell numbers of lung tissue  
1004 CD8<sup>+</sup> T (top) or B cells (bottom) at 28 d.p.i. **f**, Cell numbers of NP-specific B<sub>RM</sub> or HA-specific  
1005 B<sub>RM</sub> cells. **g**, Cell numbers of CD8<sup>+</sup>CD69<sup>+</sup> NP<sub>366-374</sub>, or CD8<sup>+</sup>CD69<sup>+</sup> PA<sub>224-233</sub> T<sub>RM</sub>. In **a-d** and **f**-  
1006 **g**, representative data were from at least two independent experiments (4-5 mice per group). In **e**,  
1007 data were pooled from two independent experiments (4 mice per group). *P* values of all  
1008 experiments were calculated by unpaired two-tailed Student's t-test.

1009

1010 **Extended Fig. 7 | T<sub>RH</sub> cells help local development of memory CD8<sup>+</sup> and B cells.**

1011 **a-c**, *Bcl6<sup>fl/fl</sup>* (with ROSA26 LSL-YFP transgene) or *Bcl6<sup>ACD4ERT2</sup>* (with ROSA26 LSL-YFP  
1012 transgene) mice were infected with X31. Tamoxifen was administrated daily from 12 to 16 d.p.i.  
1013 **a**, Experimental scheme of selective deletion of *Bcl6* in CD4<sup>+</sup> T cells. **b, c**, YFP expression in  
1014 blood CD45<sup>+</sup> (**b**) or CD4<sup>+</sup> T (**c**) cells following tamoxifen injection. **d, e**, *Bcl6<sup>fl/fl</sup>* or *Bcl6<sup>ACD4ERT2</sup>*  
1015 mice were infected with PR8. Tamoxifen was administrated daily from 12-16 d.p.i. in the  
1016 presence of daily FTY720 administration (11-34 d.p.i.). **d**, Cell numbers of CD45<sup>i.v.</sup>- CD4<sup>+</sup> T,  
1017 CD8<sup>+</sup> T or B cells at 35 d.p.i. **e**, Representative dot plot (top) or cell numbers (bottom) of NP<sub>311-  
1018 325</sub> T<sub>RH</sub> or non-T<sub>RH</sub> cells at 35 d.p.i. **f**, Cell numbers of lung CD8<sup>+</sup>CD69<sup>+</sup> NP<sub>366-374</sub> or CD8<sup>+</sup>CD69<sup>+</sup>  
1019 PA<sub>224-233</sub> T<sub>RM</sub>, B<sub>GC</sub> or HA-specific B<sub>RM</sub> cells were enumerated from X31-infected *Bcl6<sup>fl/fl</sup>* and

1020 *Bcl6*<sup>ACD4ERT2</sup> mice in the presence of FTY720 (11-34 d.p.i.) at 35 d.p.i. In **a-c** and **f**, representative  
1021 data were from at least two independent experiments (2-5 mice per group). In **d-e**, data were  
1022 pooled from two independent experiments (3 mice per group). *P* values of all experiments were  
1023 calculated by unpaired two-tailed Student's *t*-test.

1024

1025 **Extended Fig. 8 | T<sub>RH</sub> cells help CD8<sup>+</sup> T and B cells through IL-21 or CD40L dependent**  
1026 **mechanisms.**

1027 **a**, Expression of *Il21* gene in sorted IL-21-VFP<sup>Hi</sup>, IL-21-VFP<sup>Low</sup> or IL-21-VFP<sup>-</sup> CD4<sup>+</sup> T cells  
1028 from the lung tissue at 21 d.p.i. (pooled from 8 mice) **b**, Expression of *Il21* in the whole lung  
1029 from *Bcl6*<sup>fl/fl</sup> or *Bcl6*<sup>ΔT</sup> mice at 15 or 42 d.p.i. **c**, Frequencies or cell numbers of lung B<sub>GC</sub> or HA-  
1030 specific B cells from PR8 infected WT mice treated with ctl-IgG or α-IL-21R (Intranasal route).  
1031 **d**, Heat map of IL-21 signaling-related genes from sorted lung CD8<sup>+</sup> NP<sub>366-374</sub> or PA<sub>224-233</sub> T<sub>RM</sub> or  
1032 splenic CD8<sup>+</sup> NP<sub>366-374</sub> or PA<sub>224-233</sub> T<sub>MEM</sub> determined by Nanostring at 38 d.p.i. as reported  
1033 previously <sup>40</sup>. **e**, Geometric M.F.I. of BATF expression in lung CD8<sup>+</sup> NP<sub>366-374</sub>, CD8<sup>+</sup> PA<sub>224-233</sub>  
1034 T<sub>RM</sub>, splenic CD8<sup>+</sup> NP<sub>366-374</sub> or PA<sub>224-233</sub> T<sub>MEM</sub> cells from PR8 infected mice at 35 d.p.i. **f**, CD40L  
1035 expression in the NP<sub>311-325</sub> T<sub>RH</sub> or non-T<sub>RH</sub> cells following PMA/Ionomycin stimulation at 28  
1036 d.p.i. **g**, Schematics of the summary. In **b-c** and **e-f**, representative data were from at least two  
1037 independent experiments (3-5 mice per group). *P* values were calculated by unpaired (b and c) or  
1038 paired (f) two-tailed Student's *t*-test. *P* value in e was analyzed by one-way ANOVA.

1039

1040

1041

1042

1043

1044

1045

1046

1047

1048

1049

1050

1051 **References**

- 1052 1. Onodera, T. *et al.* Memory B cells in the lung participate in protective humoral immune  
1053 responses to pulmonary influenza virus reinfection. *Proc Natl Acad Sci U S A* **109**, 2485-2490  
1054 (2012).
- 1055 2. Schenkel, J.M. & Masopust, D. Tissue-resident memory T cells. *Immunity* **41**, 886-897 (2014).  
1056
- 1057 3. Mueller, S.N. & Mackay, L.K. Tissue-resident memory T cells: local specialists in immune  
1058 defence. *Nat Rev Immunol* **16**, 79-89 (2016).  
1059
- 1060 4. Milner, J.J. & Goldrath, A.W. Transcriptional programming of tissue-resident memory CD8(+) T  
1061 cells. *Curr Opin Immunol* **51**, 162-169 (2018).  
1062
- 1063 5. Allie, S.R. *et al.* The establishment of resident memory B cells in the lung requires local antigen  
1064 encounter. *Nat Immunol* **20**, 97-108 (2019).  
1065
- 1066 6. Park, S.L. *et al.* Local proliferation maintains a stable pool of tissue-resident memory T cells after  
1067 antiviral recall responses. *Nat Immunol* **19**, 183-191 (2018).  
1068
- 1069 7. Beura, L.K. *et al.* Intravital mucosal imaging of CD8(+) resident memory T cells shows tissue-  
1070 autonomous recall responses that amplify secondary memory. *Nat Immunol* **19**, 173-182 (2018).  
1071
- 1072 8. Jameson, S.C. & Masopust, D. Understanding Subset Diversity in T Cell Memory. *Immunity* **48**,  
1073 214-226 (2018).  
1074
- 1075 9. Ruf, B.R. & Knuf, M. The burden of seasonal and pandemic influenza in infants and children. *Eur*  
1076 *J Pediatr* **173**, 265-276 (2014).  
1077
- 1078 10. Molinari, N.A. *et al.* The annual impact of seasonal influenza in the US: measuring disease  
1079 burden and costs. *Vaccine* **25**, 5086-5096 (2007).  
1080
- 1081 11. Rolfes, M.A. *et al.* Annual estimates of the burden of seasonal influenza in the United States: A  
1082 tool for strengthening influenza surveillance and preparedness. *Influenza Other Respir Viruses*  
1083 **12**, 132-137 (2018).  
1084
- 1085 12. Turner, D.L. *et al.* Lung niches for the generation and maintenance of tissue-resident memory T  
1086 cells. *Mucosal Immunol* **7**, 501-510 (2014).  
1087

1088

- 1089 13. Takamura, S. & Kohlmeier, J.E. Establishment and Maintenance of Conventional and Circulation-  
1090 Driven Lung-Resident Memory CD8(+) T Cells Following Respiratory Virus Infections. *Front*  
1091 *Immunol* **10**, 733 (2019).
- 1092  
1093 14. Adachi, Y. *et al.* Distinct germinal center selection at local sites shapes memory B cell response  
1094 to viral escape. *J Exp Med* **212**, 1709-1723 (2015).
- 1095  
1096 15. Sun, J. & Braciale, T.J. Role of T cell immunity in recovery from influenza virus infection. *Curr*  
1097 *Opin Virol* **3**, 425-429 (2013).
- 1098  
1099 16. La Gruta, N.L. & Turner, S.J. T cell mediated immunity to influenza: mechanisms of viral control.  
1100 *Trends Immunol* **35**, 396-402 (2014).
- 1101  
1102 17. Duan, S. & Thomas, P.G. Balancing Immune Protection and Immune Pathology by CD8(+) T-Cell  
1103 Responses to Influenza Infection. *Front Immunol* **7**, 25 (2016).
- 1104  
1105 18. Kohlmeier, J.E. & Woodland, D.L. Immunity to respiratory viruses. *Annu Rev Immunol* **27**, 61-82  
1106 (2009).
- 1107  
1108 19. Wilkinson, T.M. *et al.* Preexisting influenza-specific CD4+ T cells correlate with disease  
1109 protection against influenza challenge in humans. *Nat Med* **18**, 274-280 (2012).
- 1110  
1111 20. Sridhar, S. *et al.* Cellular immune correlates of protection against symptomatic pandemic  
1112 influenza. *Nat Med* **19**, 1305-1312 (2013).
- 1113  
1114 21. McMaster, S.R., Wilson, J.J., Wang, H. & Kohlmeier, J.E. Airway-Resident Memory CD8 T Cells  
1115 Provide Antigen-Specific Protection against Respiratory Virus Challenge through Rapid IFN-  
1116 gamma Production. *J Immunol* **195**, 203-209 (2015).
- 1117  
1118 22. Pizzolla, A. & Wakim, L.M. Memory T Cell Dynamics in the Lung during Influenza Virus Infection.  
1119 *J Immunol* **202**, 374-381 (2019).
- 1120  
1121 23. Koutsakos, M. *et al.* Human CD8(+) T cell cross-reactivity across influenza A, B and C viruses. *Nat*  
1122 *Immunol* (2019).
- 1123  
1124 24. Pizzolla, A. *et al.* Influenza-specific lung-resident memory T cells are proliferative and  
1125 polyfunctional and maintain diverse TCR profiles. *J Clin Invest* **128**, 721-733 (2018).
- 1126  
1127 25. Slutter, B. *et al.* Dynamics of influenza-induced lung-resident memory T cells underlie waning  
1128 heterosubtypic immunity. *Sci Immunol* **2** (2017).



- 1129  
1130 26. Cauley, L.S. Environmental cues orchestrate regional immune surveillance and protection by  
1131 pulmonary CTLs. *J Leukoc Biol* **100**, 905-912 (2016).
- 1132  
1133 27. Johnson, S. *et al.* Selected Toll-like receptor ligands and viruses promote helper-independent  
1134 cytotoxic T cell priming by upregulating CD40L on dendritic cells. *Immunity* **30**, 218-227 (2009).
- 1135  
1136 28. Sun, J., Dodd, H., Moser, E.K., Sharma, R. & Braciale, T.J. CD4+ T cell help and innate-derived IL-  
1137 27 induce Blimp-1-dependent IL-10 production by antiviral CTLs. *Nat Immunol* **12**, 327-334  
1138 (2011).
- 1139  
1140 29. Belz, G.T., Wodarz, D., Diaz, G., Nowak, M.A. & Doherty, P.C. Compromised influenza virus-  
1141 specific CD8(+)-T-cell memory in CD4(+)-T-cell-deficient mice. *J Virol* **76**, 12388-12393 (2002).
- 1142  
1143 30. Laidlaw, B.J. *et al.* CD4+ T cell help guides formation of CD103+ lung-resident memory CD8+ T  
1144 cells during influenza viral infection. *Immunity* **41**, 633-645 (2014).
- 1145  
1146 31. Crotty, S. A brief history of T cell help to B cells. *Nat Rev Immunol* **15**, 185-189 (2015).
- 1147  
1148 32. Papillion, A. *et al.* Inhibition of IL-2 responsiveness by IL-6 is required for the generation of GC-  
1149 TFH cells. *Sci Immunol* **4** (2019).
- 1150  
1151 33. Allie, S.R. & Randall, T.D. Pulmonary immunity to viruses. *Clin Sci (Lond)* **131**, 1737-1762 (2017).
- 1152  
1153 34. Rao, D.A. *et al.* Pathologically expanded peripheral T helper cell subset drives B cells in  
1154 rheumatoid arthritis. *Nature* **542**, 110-114 (2017).
- 1155  
1156 35. Rao, D.A. T Cells That Help B Cells in Chronically Inflamed Tissues. *Front Immunol* **9**, 1924 (2018).
- 1157  
1158 36. Vu Van, D. *et al.* Local T/B cooperation in inflamed tissues is supported by T follicular helper-like  
1159 cells. *Nat Commun* **7**, 10875 (2016).
- 1160  
1161 37. Tan, H.X. *et al.* Inducible Bronchus-Associated Lymphoid Tissues (iBALT) Serve as Sites of B Cell  
1162 Selection and Maturation Following Influenza Infection in Mice. *Front Immunol* **10**, 611 (2019).
- 1163  
1164 38. Hornick, E.E., Zacharias, Z.R. & Legge, K.L. Kinetics and Phenotype of the CD4 T Cell Response to  
1165 Influenza Virus Infections. *Front Immunol* **10**, 2351 (2019).
- 1166  
1167 39. Woodland, D.L. & Kohlmeier, J.E. Migration, maintenance and recall of memory T cells in  
1168 peripheral tissues. *Nat Rev Immunol* **9**, 153-161 (2009).

- 1169  
1170 40. Wang, Z. *et al.* PD-1(hi) CD8(+) resident memory T cells balance immunity and fibrotic sequelae.  
1171 *Sci Immunol* **4** (2019).
- 1172  
1173 41. Hufford, M.M., Kim, T.S., Sun, J. & Braciale, T.J. Antiviral CD8+ T cell effector activities in situ are  
1174 regulated by target cell type. *J Exp Med* **208**, 167-180 (2011).
- 1175  
1176 42. Sun, J., Madan, R., Karp, C.L. & Braciale, T.J. Effector T cells control lung inflammation during  
1177 acute influenza virus infection by producing IL-10. *Nat Med* **15**, 277-284 (2009).
- 1178  
1179 43. Yao, S. *et al.* Interferon regulatory factor 4 sustains CD8(+) T cell expansion and effector  
1180 differentiation. *Immunity* **39**, 833-845 (2013).
- 1181  
1182 44. Anderson, K.G. *et al.* Intravascular staining for discrimination of vascular and tissue leukocytes.  
1183 *Nat Protoc* **9**, 209-222 (2014).
- 1184  
1185 45. Goplen, N.P. *et al.* Tissue-Resident Macrophages Limit Pulmonary CD8 Resident Memory T Cell  
1186 Establishment. *Front Immunol* **10**, 2332 (2019).
- 1187  
1188 46. Moyron-Quiroz, J.E. *et al.* Role of inducible bronchus associated lymphoid tissue (iBALT) in  
1189 respiratory immunity. *Nat Med* **10**, 927-934 (2004).
- 1190  
1191 47. Hwang, J.Y., Randall, T.D. & Silva-Sanchez, A. Inducible Bronchus-Associated Lymphoid Tissue:  
1192 Taming Inflammation in the Lung. *Front Immunol* **7**, 258 (2016).
- 1193  
1194 48. Thomas, P.G., Keating, R., Hulse-Post, D.J. & Doherty, P.C. Cell-mediated protection in influenza  
1195 infection. *Emerg Infect Dis* **12**, 48-54 (2006).
- 1196  
1197 49. La Gruta, N.L. *et al.* A virus-specific CD8+ T cell immunodominance hierarchy determined by  
1198 antigen dose and precursor frequencies. *Proc Natl Acad Sci U S A* **103**, 994-999 (2006).
- 1199  
1200 50. Ballesteros-Tato, A., Leon, B., Lee, B.O., Lund, F.E. & Randall, T.D. Epitope-specific regulation of  
1201 memory programming by differential duration of antigen presentation to influenza-specific  
1202 CD8(+) T cells. *Immunity* **41**, 127-140 (2014).
- 1203  
1204 51. Baeyens, A., Fang, V., Chen, C. & Schwab, S.R. Exit Strategies: S1P Signaling and T Cell Migration.  
1205 *Trends Immunol* **36**, 778-787 (2015).
- 1206  
1207 52. Marnik, E.A. *et al.* Precocious Interleukin 21 Expression in Naive Mice Identifies a Natural Helper  
1208 Cell Population in Autoimmune Disease. *Cell Rep* **21**, 208-221 (2017).

- 1209  
1210 53. Wu, T. *et al.* TCF1 Is Required for the T Follicular Helper Cell Response to Viral Infection. *Cell Rep*  
1211 **12**, 2099-2110 (2015).
- 1212  
1213 54. Kumar, B.V. *et al.* Human Tissue-Resident Memory T Cells Are Defined by Core Transcriptional  
1214 and Functional Signatures in Lymphoid and Mucosal Sites. *Cell Rep* **20**, 2921-2934 (2017).
- 1215  
1216 55. Li, C. *et al.* The Transcription Factor Bhlhe40 Programs Mitochondrial Regulation of Resident  
1217 CD8(+) T Cell Fitness and Functionality. *Immunity* **51**, 491-507 e497 (2019).
- 1218  
1219 56. Beura, L.K. *et al.* CD4(+) resident memory T cells dominate immunosurveillance and orchestrate  
1220 local recall responses. *J Exp Med* **216**, 1214-1229 (2019).
- 1221  
1222 57. Crotty, S. T Follicular Helper Cell Biology: A Decade of Discovery and Diseases. *Immunity* **50**,  
1223 1132-1148 (2019).
- 1224  
1225 58. Crotty, S. T follicular helper cell differentiation, function, and roles in disease. *Immunity* **41**, 529-  
1226 542 (2014).
- 1227  
1228 59. Kim, T.S., Hufford, M.M., Sun, J., Fu, Y.X. & Braciale, T.J. Antigen persistence and the control of  
1229 local T cell memory by migrant respiratory dendritic cells after acute virus infection. *J Exp Med*  
1230 **207**, 1161-1172 (2010).
- 1231  
1232 60. GeurtsvanKessel, C.H. *et al.* Dendritic cells are crucial for maintenance of tertiary lymphoid  
1233 structures in the lung of influenza virus-infected mice. *J Exp Med* **206**, 2339-2349 (2009).
- 1234  
1235 61. Johnston, R.J. *et al.* Bcl6 and Blimp-1 are reciprocal and antagonistic regulators of T follicular  
1236 helper cell differentiation. *Science* **325**, 1006-1010 (2009).
- 1237  
1238 62. Nurieva, R.I. *et al.* Bcl6 mediates the development of T follicular helper cells. *Science* **325**, 1001-  
1239 1005 (2009).
- 1240  
1241 63. Hollister, K. *et al.* Insights into the role of Bcl6 in follicular Th cells using a new conditional  
1242 mutant mouse model. *J Immunol* **191**, 3705-3711 (2013).
- 1243  
1244 64. Rutigliano, J.A. *et al.* Highly pathological influenza A virus infection is associated with augmented  
1245 expression of PD-1 by functionally compromised virus-specific CD8+ T cells. *J Virol* **88**, 1636-1651  
1246 (2014).
- 1247  
1248 65. Tian, Y. & Zajac, A.J. IL-21 and T Cell Differentiation: Consider the Context. *Trends Immunol* **37**,  
1249 557-568 (2016).

- 1250  
1251 66. Xin, G. *et al.* A Critical Role of IL-21-Induced BATF in Sustaining CD8-T-Cell-Mediated Chronic  
1252 Viral Control. *Cell Rep* **13**, 1118-1124 (2015).
- 1253  
1254 67. Liu, X. *et al.* Transcription factor achaete-scute homologue 2 initiates follicular T-helper-cell  
1255 development. *Nature* **507**, 513-518 (2014).
- 1256  
1257 68. Krishnaswamy, J.K., Alsen, S., Yrlid, U., Eisenbarth, S.C. & Williams, A. Determination of T  
1258 Follicular Helper Cell Fate by Dendritic Cells. *Front Immunol* **9**, 2169 (2018).
- 1259  
1260 69. Wherry, E.J. & Kurachi, M. Molecular and cellular insights into T cell exhaustion. *Nat Rev*  
1261 *Immunol* **15**, 486-499 (2015).
- 1262  
1263 70. Barber, D.L. *et al.* Restoring function in exhausted CD8 T cells during chronic viral infection.  
1264 *Nature* **439**, 682-687 (2006).
- 1265  
1266 71. Zander, R. *et al.* CD4(+) T Cell Help Is Required for the Formation of a Cytolytic CD8(+) T Cell  
1267 Subset that Protects against Chronic Infection and Cancer. *Immunity* **51**, 1028-1042 e1024  
1268 (2019).
- 1269  
1270 72. Zens, K.D., Chen, J.K. & Farber, D.L. Vaccine-generated lung tissue-resident memory T cells  
1271 provide heterosubtypic protection to influenza infection. *JCI Insight* **1** (2016).
- 1272  
1273 73. Clemens, E.B., van de Sandt, C., Wong, S.S., Wakim, L.M. & Valkenburg, S.A. Harnessing the  
1274 Power of T Cells: The Promising Hope for a Universal Influenza Vaccine. *Vaccines (Basel)* **6**  
1275 (2018).
- 1276  
1277 74. Angeletti, D. & Yewdell, J.W. Is It Possible to Develop a "Universal" Influenza Virus Vaccine?  
1278 Outflanking Antibody Immunodominance on the Road to Universal Influenza Vaccination. *Cold*  
1279 *Spring Harb Perspect Biol* **10** (2018).
- 1280  
1281 75. Estrada, L.D. & Schultz-Cherry, S. Development of a Universal Influenza Vaccine. *J Immunol* **202**,  
1282 392-398 (2019).
- 1283  
1284 76. Keeler, S.P. *et al.* Influenza A Virus Infection Causes Chronic Lung Disease Linked to Sites of  
1285 Active Viral RNA Remnants. *J Immunol* **201**, 2354-2368 (2018).
- 1286  
1287 77. Marchal-Somme, J. *et al.* Cutting edge: nonproliferating mature immune cells form a novel type  
1288 of organized lymphoid structure in idiopathic pulmonary fibrosis. *J Immunol* **176**, 5735-5739  
1289 (2006).
- 1290

- 1291 78. Elliot, J.G. *et al.* Aggregations of lymphoid cells in the airways of nonsmokers, smokers, and  
1292 subjects with asthma. *Am J Respir Crit Care Med* **169**, 712-718 (2004).
- 1293  
1294 79. Yadava, K., Bollyky, P. & Lawson, M.A. The formation and function of tertiary lymphoid follicles  
1295 in chronic pulmonary inflammation. *Immunology* **149**, 262-269 (2016).
- 1296  
1297 80. Rangel-Moreno, J. *et al.* Inducible bronchus-associated lymphoid tissue (iBALT) in patients with  
1298 pulmonary complications of rheumatoid arthritis. *J Clin Invest* **116**, 3183-3194 (2006).
- 1299  
1300 81. Hollern, D.P. *et al.* B Cells and T Follicular Helper Cells Mediate Response to Checkpoint  
1301 Inhibitors in High Mutation Burden Mouse Models of Breast Cancer. *Cell* **179**, 1191-1206 e1121  
1302 (2019).
- 1303  
1304 82. Helmink, B.A. *et al.* B cells and tertiary lymphoid structures promote immunotherapy response.  
1305 *Nature* **577**, 549-555 (2020).
- 1306  
1307 83. Cabrita, R. *et al.* Tertiary lymphoid structures improve immunotherapy and survival in  
1308 melanoma. *Nature* **577**, 561-565 (2020).
- 1309  
1310 84. Milner, J.J. *et al.* Runx3 programs CD8(+) T cell residency in non-lymphoid tissues and tumours.  
1311 *Nature* **552**, 253-257 (2017).
- 1312  
1313 85. Zhang, L. *et al.* Lineage tracking reveals dynamic relationships of T cells in colorectal cancer.  
1314 *Nature* **564**, 268-272 (2018).
- 1315  
1316 86. Steach, H.R. *et al.* Cross-Reactivity with Self-Antigen Tunes the Functional Potential of Naive B  
1317 Cells Specific for Foreign Antigens. *J Immunol* **204**, 498-509 (2020).
- 1318  
1319 87. Butler, A., Hoffman, P., Smibert, P., Papalexi, E. & Satija, R. Integrating single-cell transcriptomic  
1320 data across different conditions, technologies, and species. *Nat Biotechnol* **36**, 411-420 (2018).
- 1321  
1322

# Figure 1

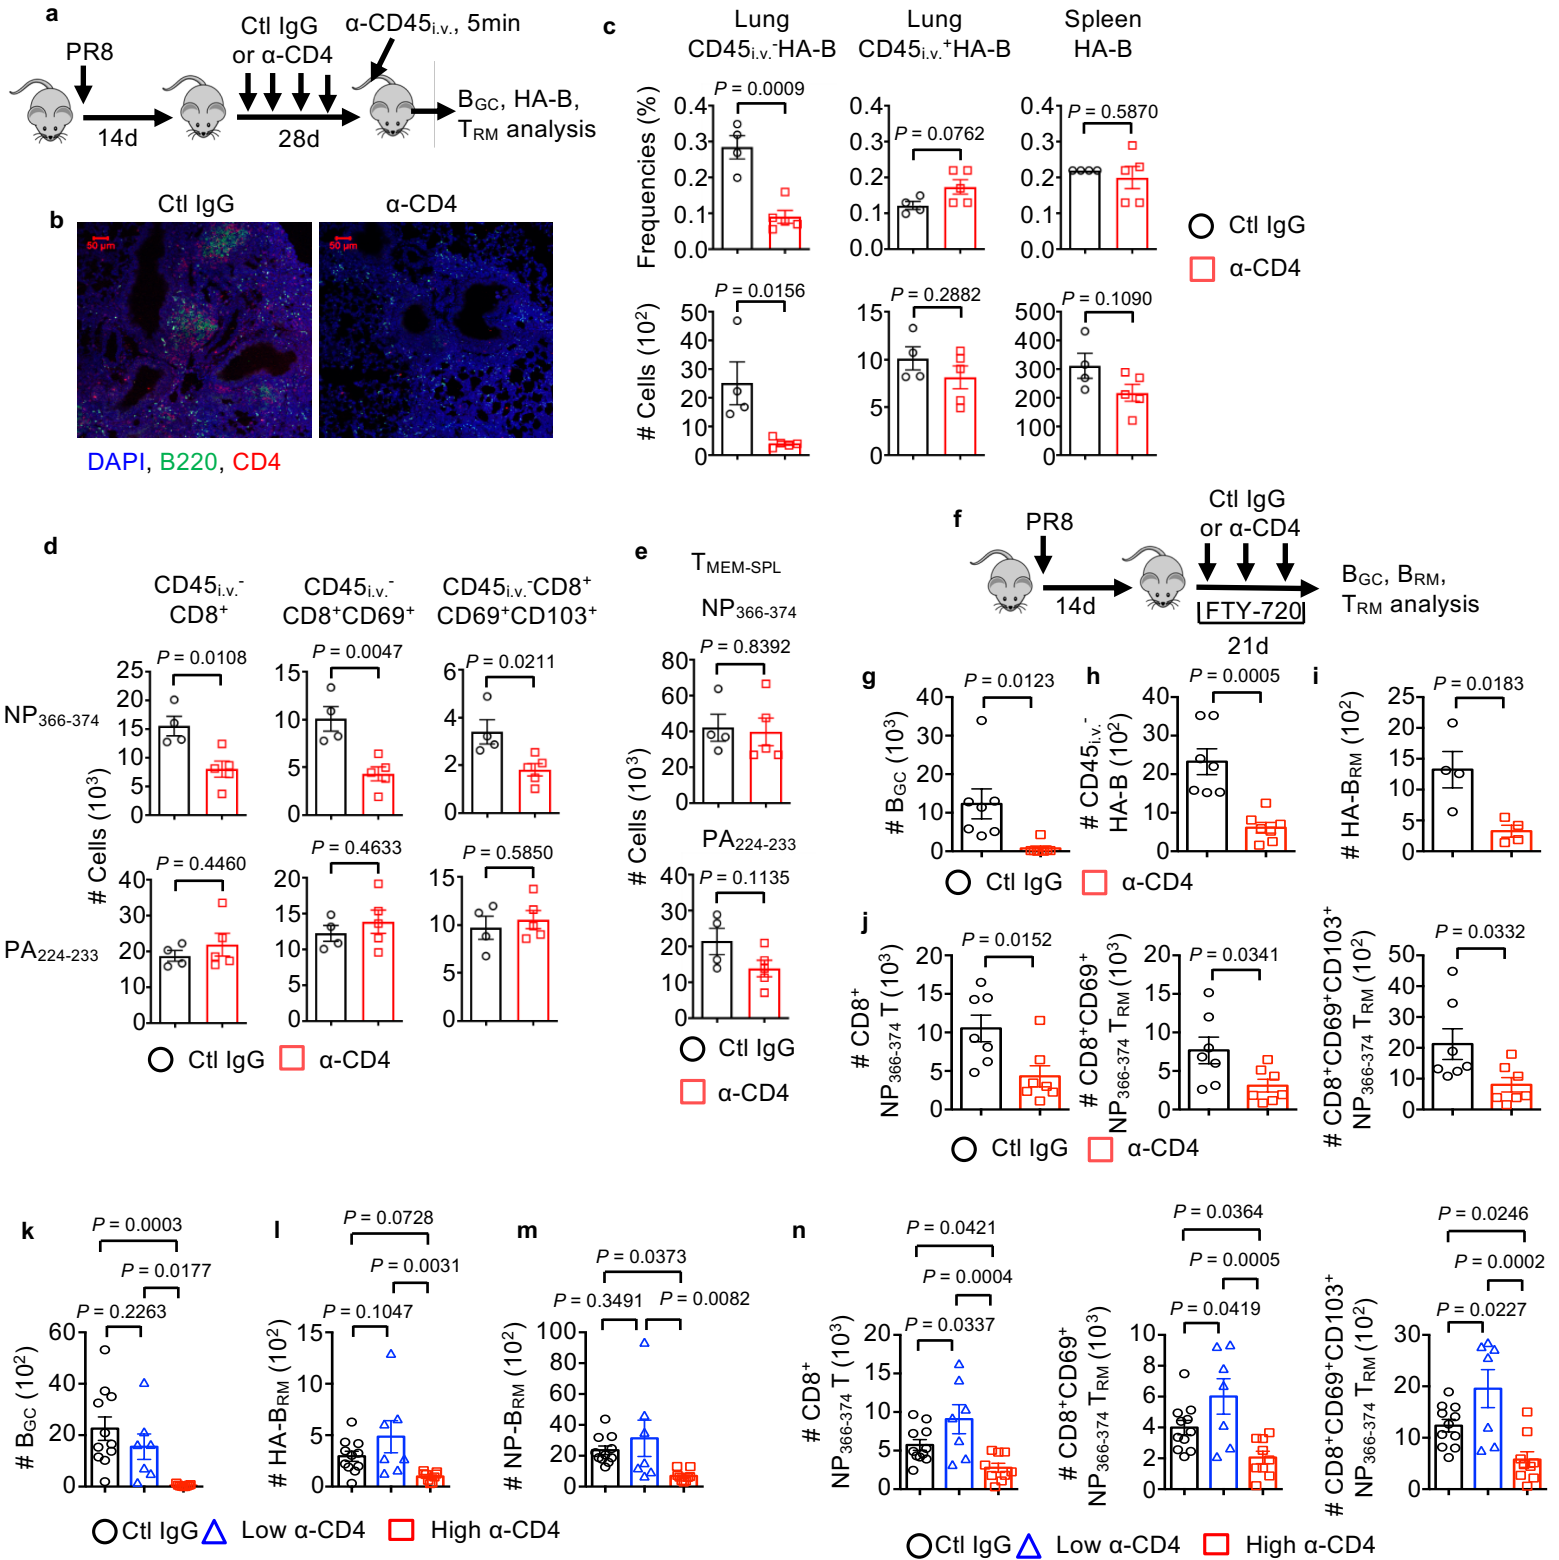

## Figure 2

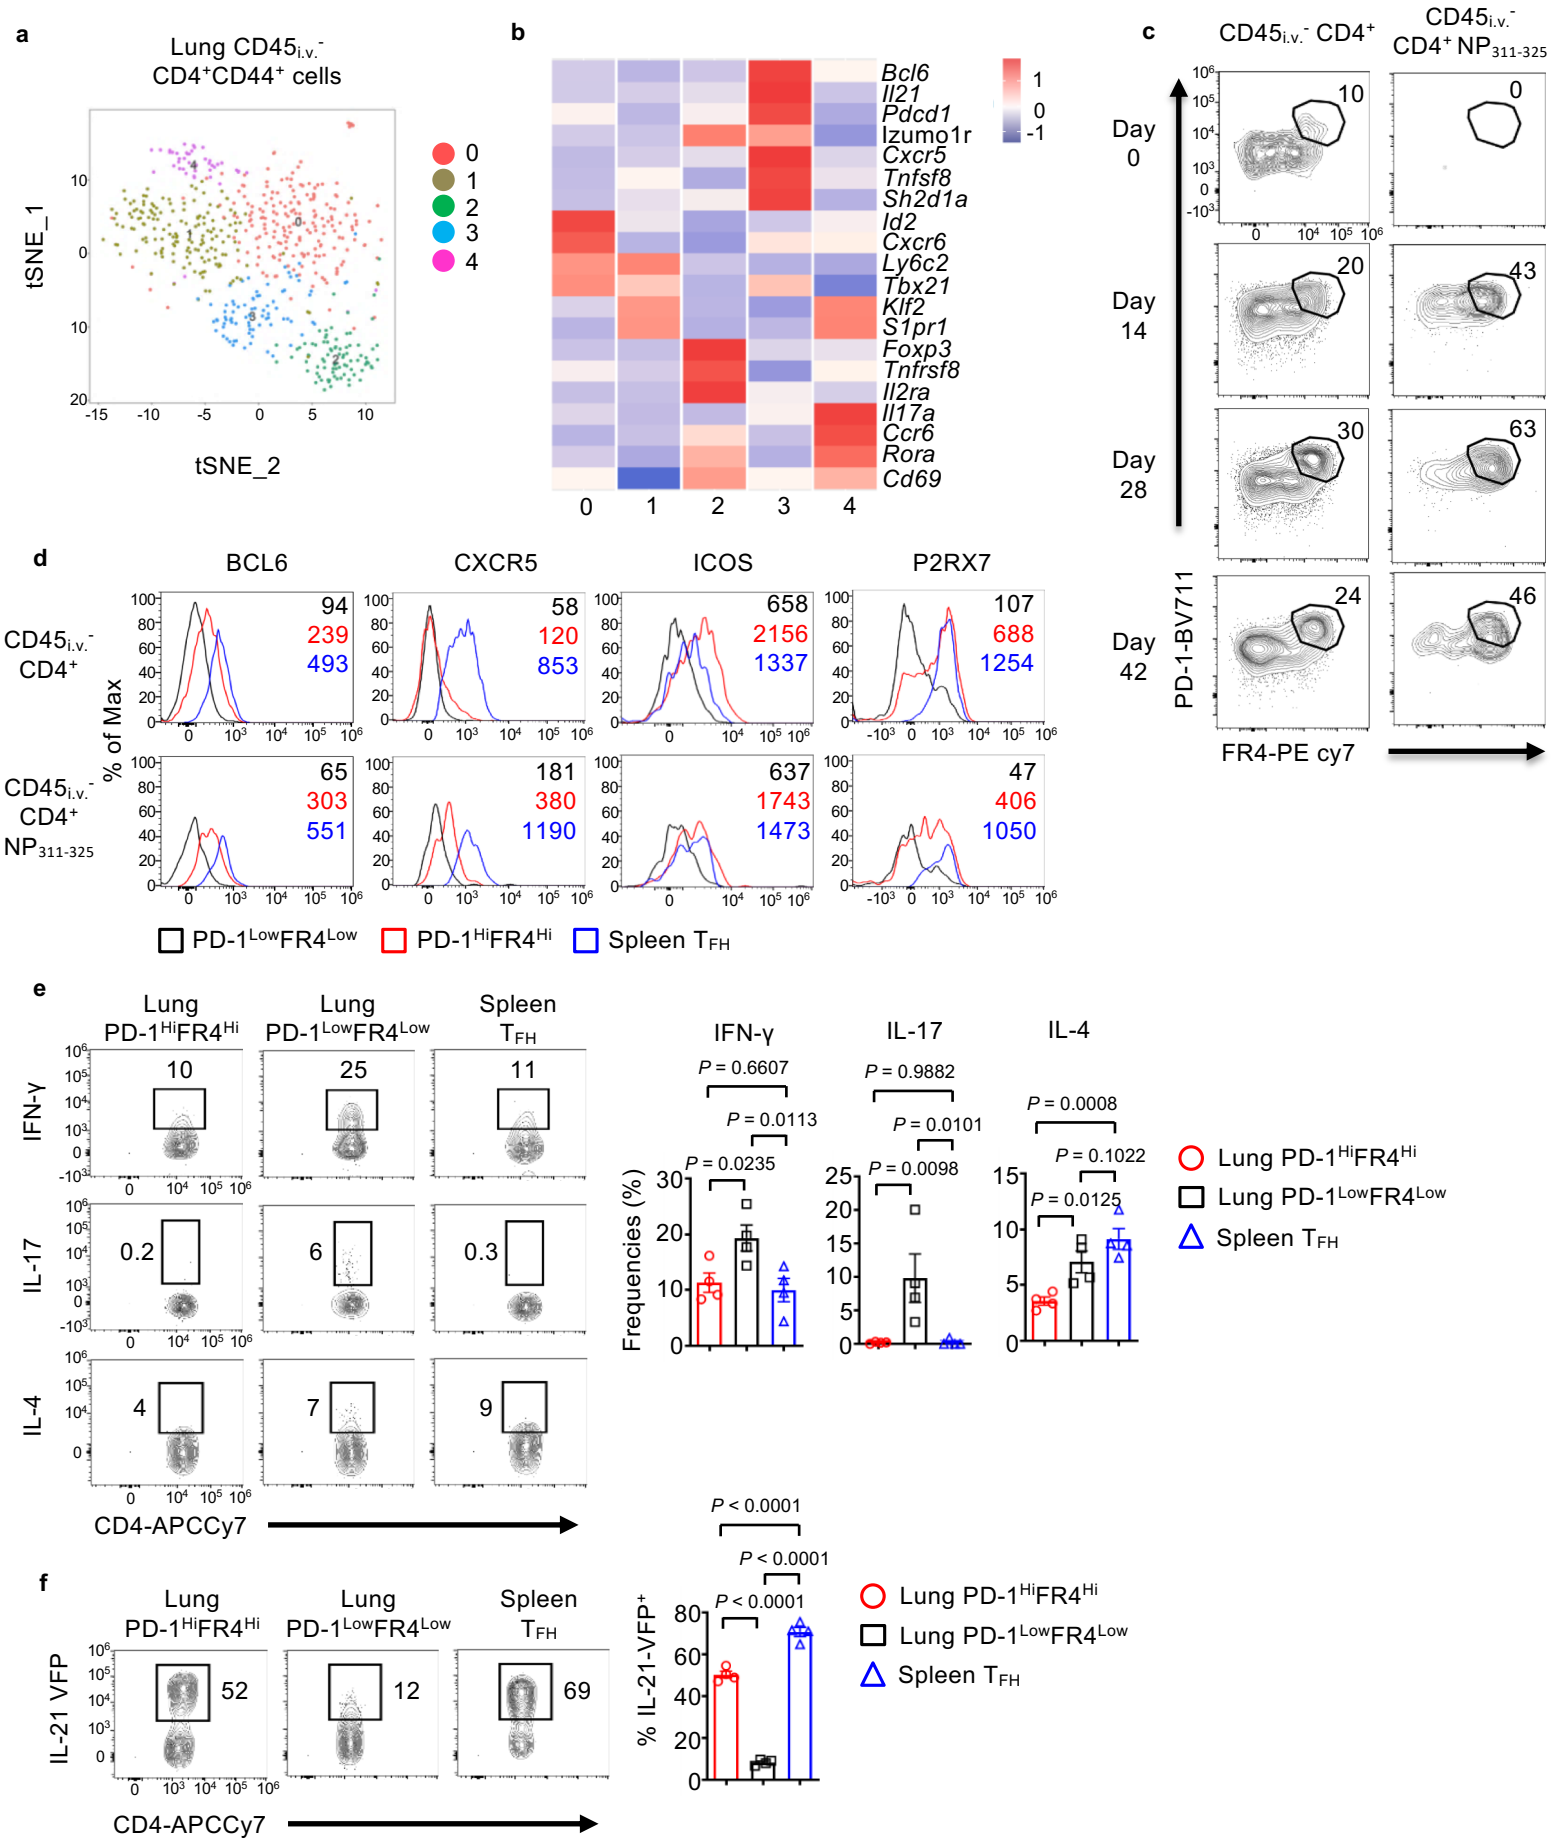



## Figure 3

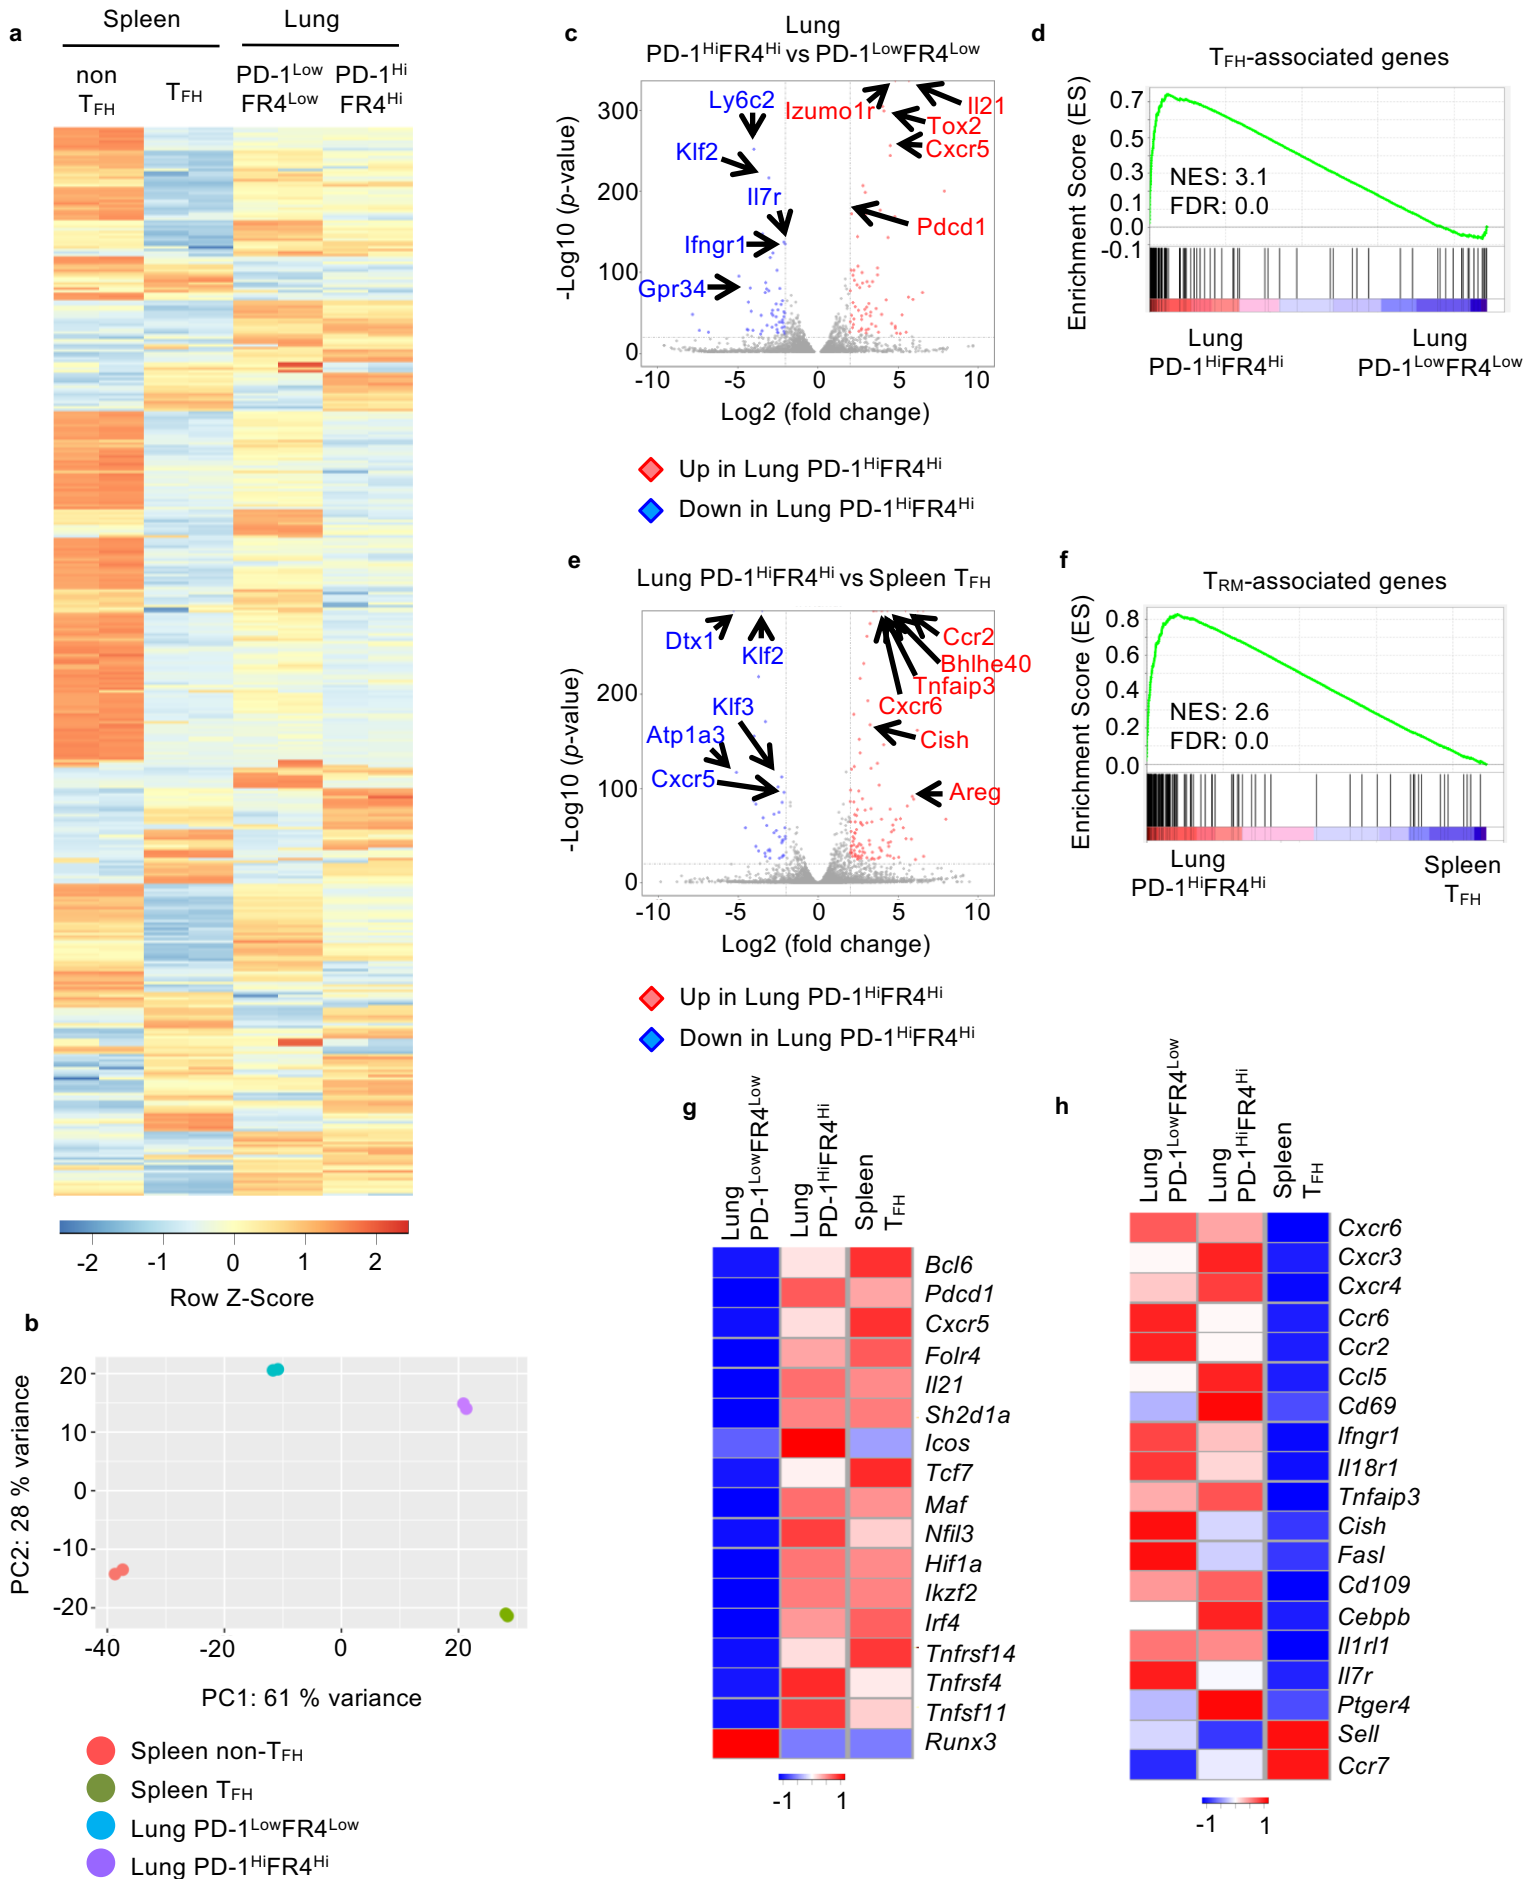

# Figure 4

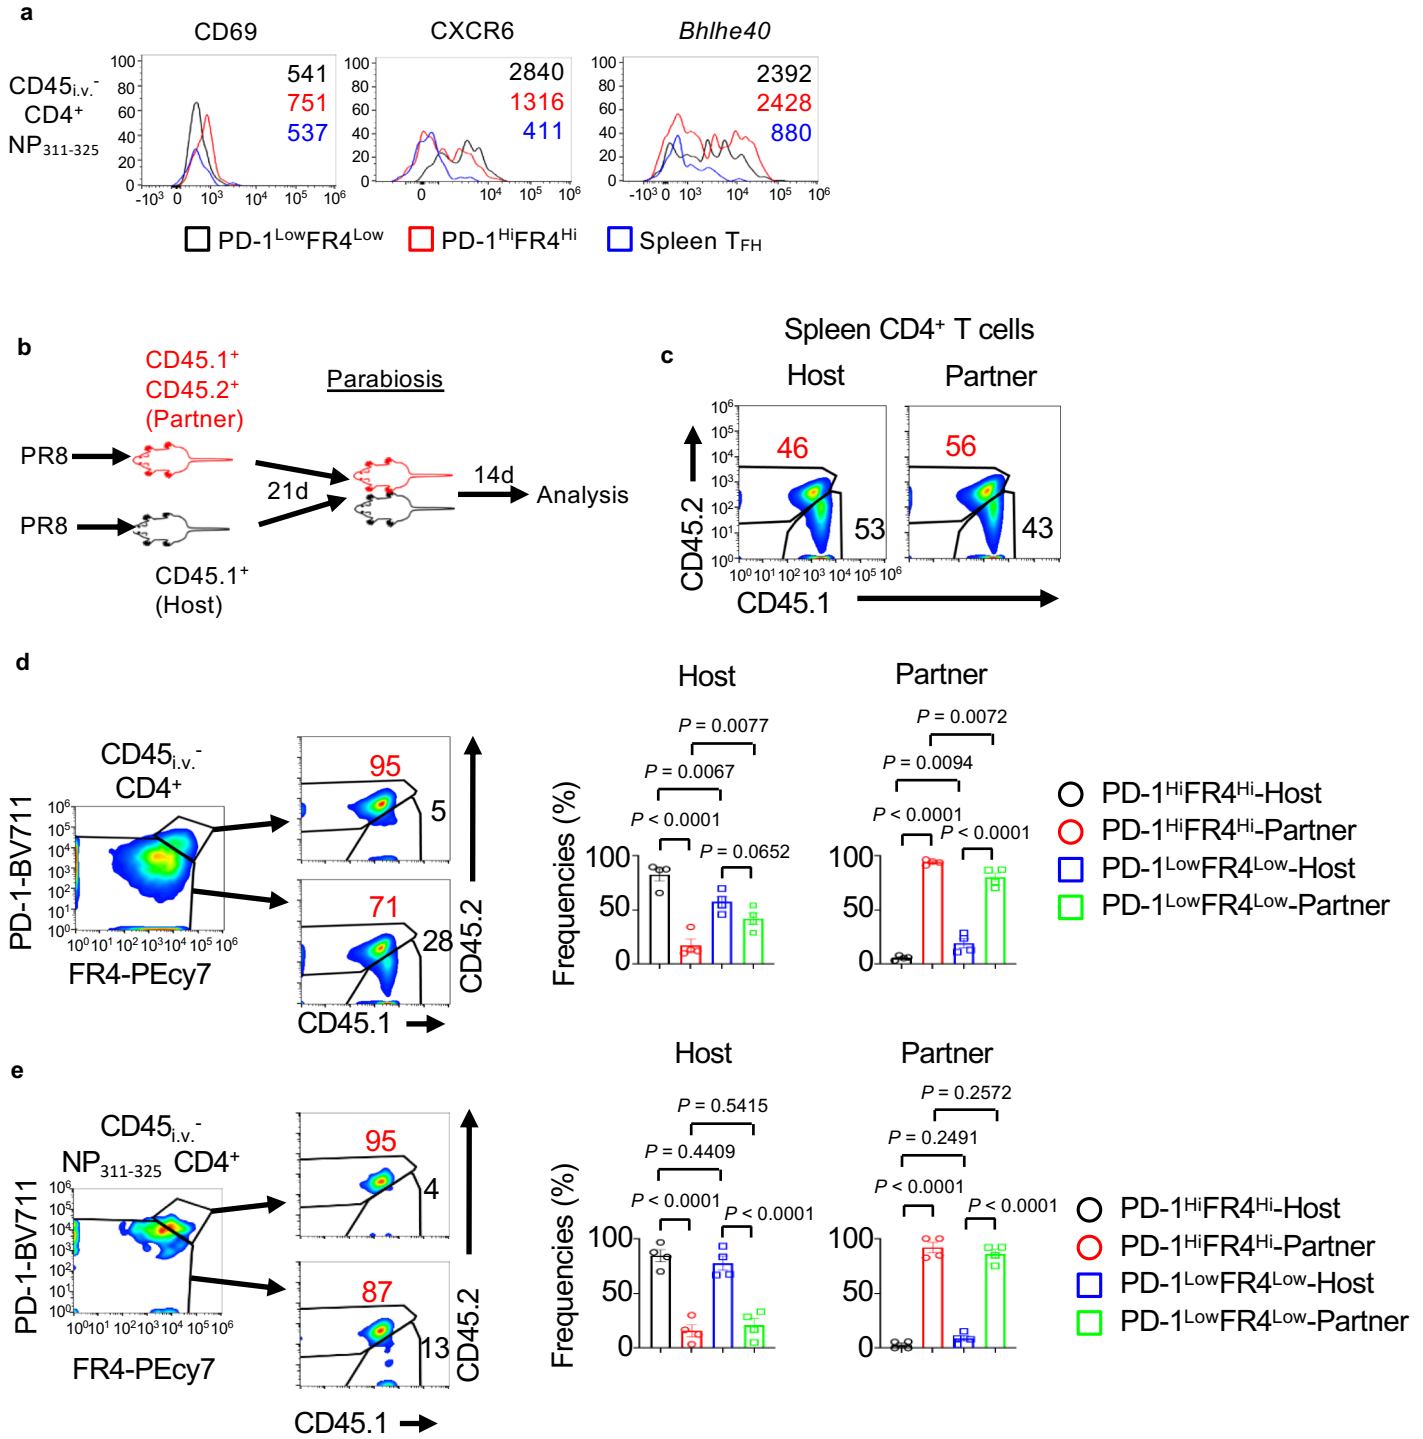

## Figure 5

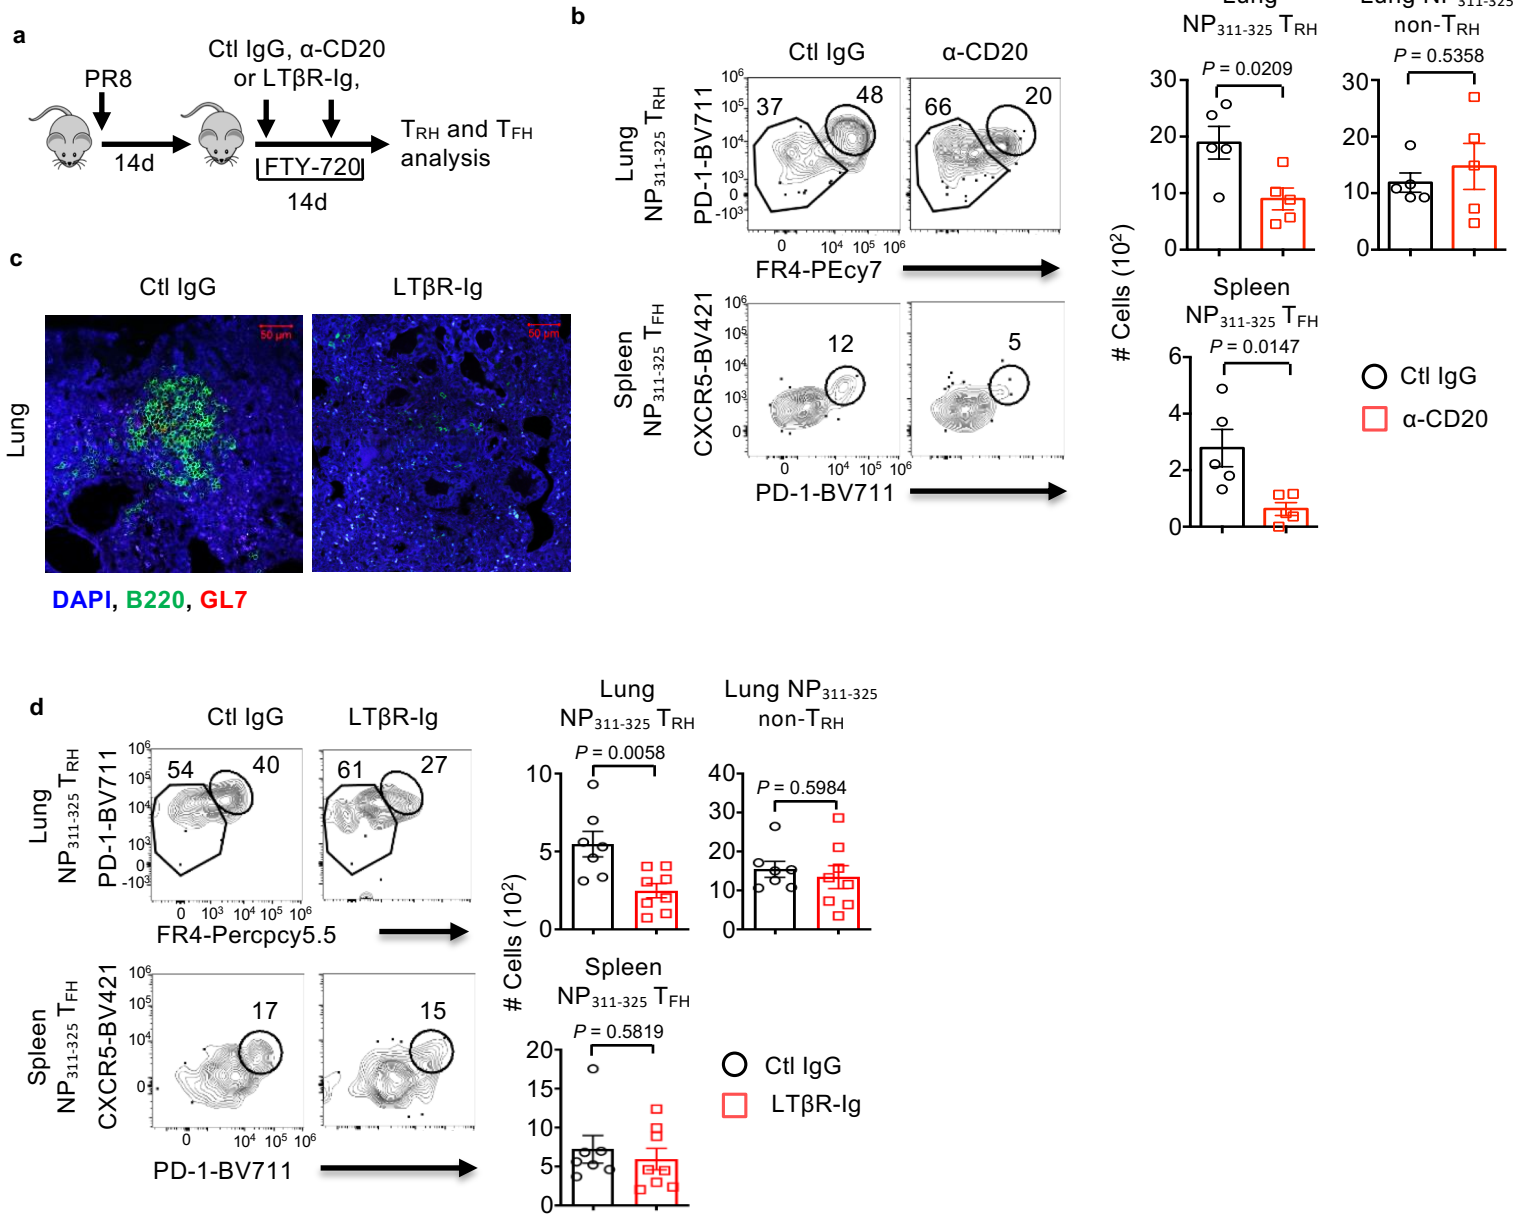

## Figure 6

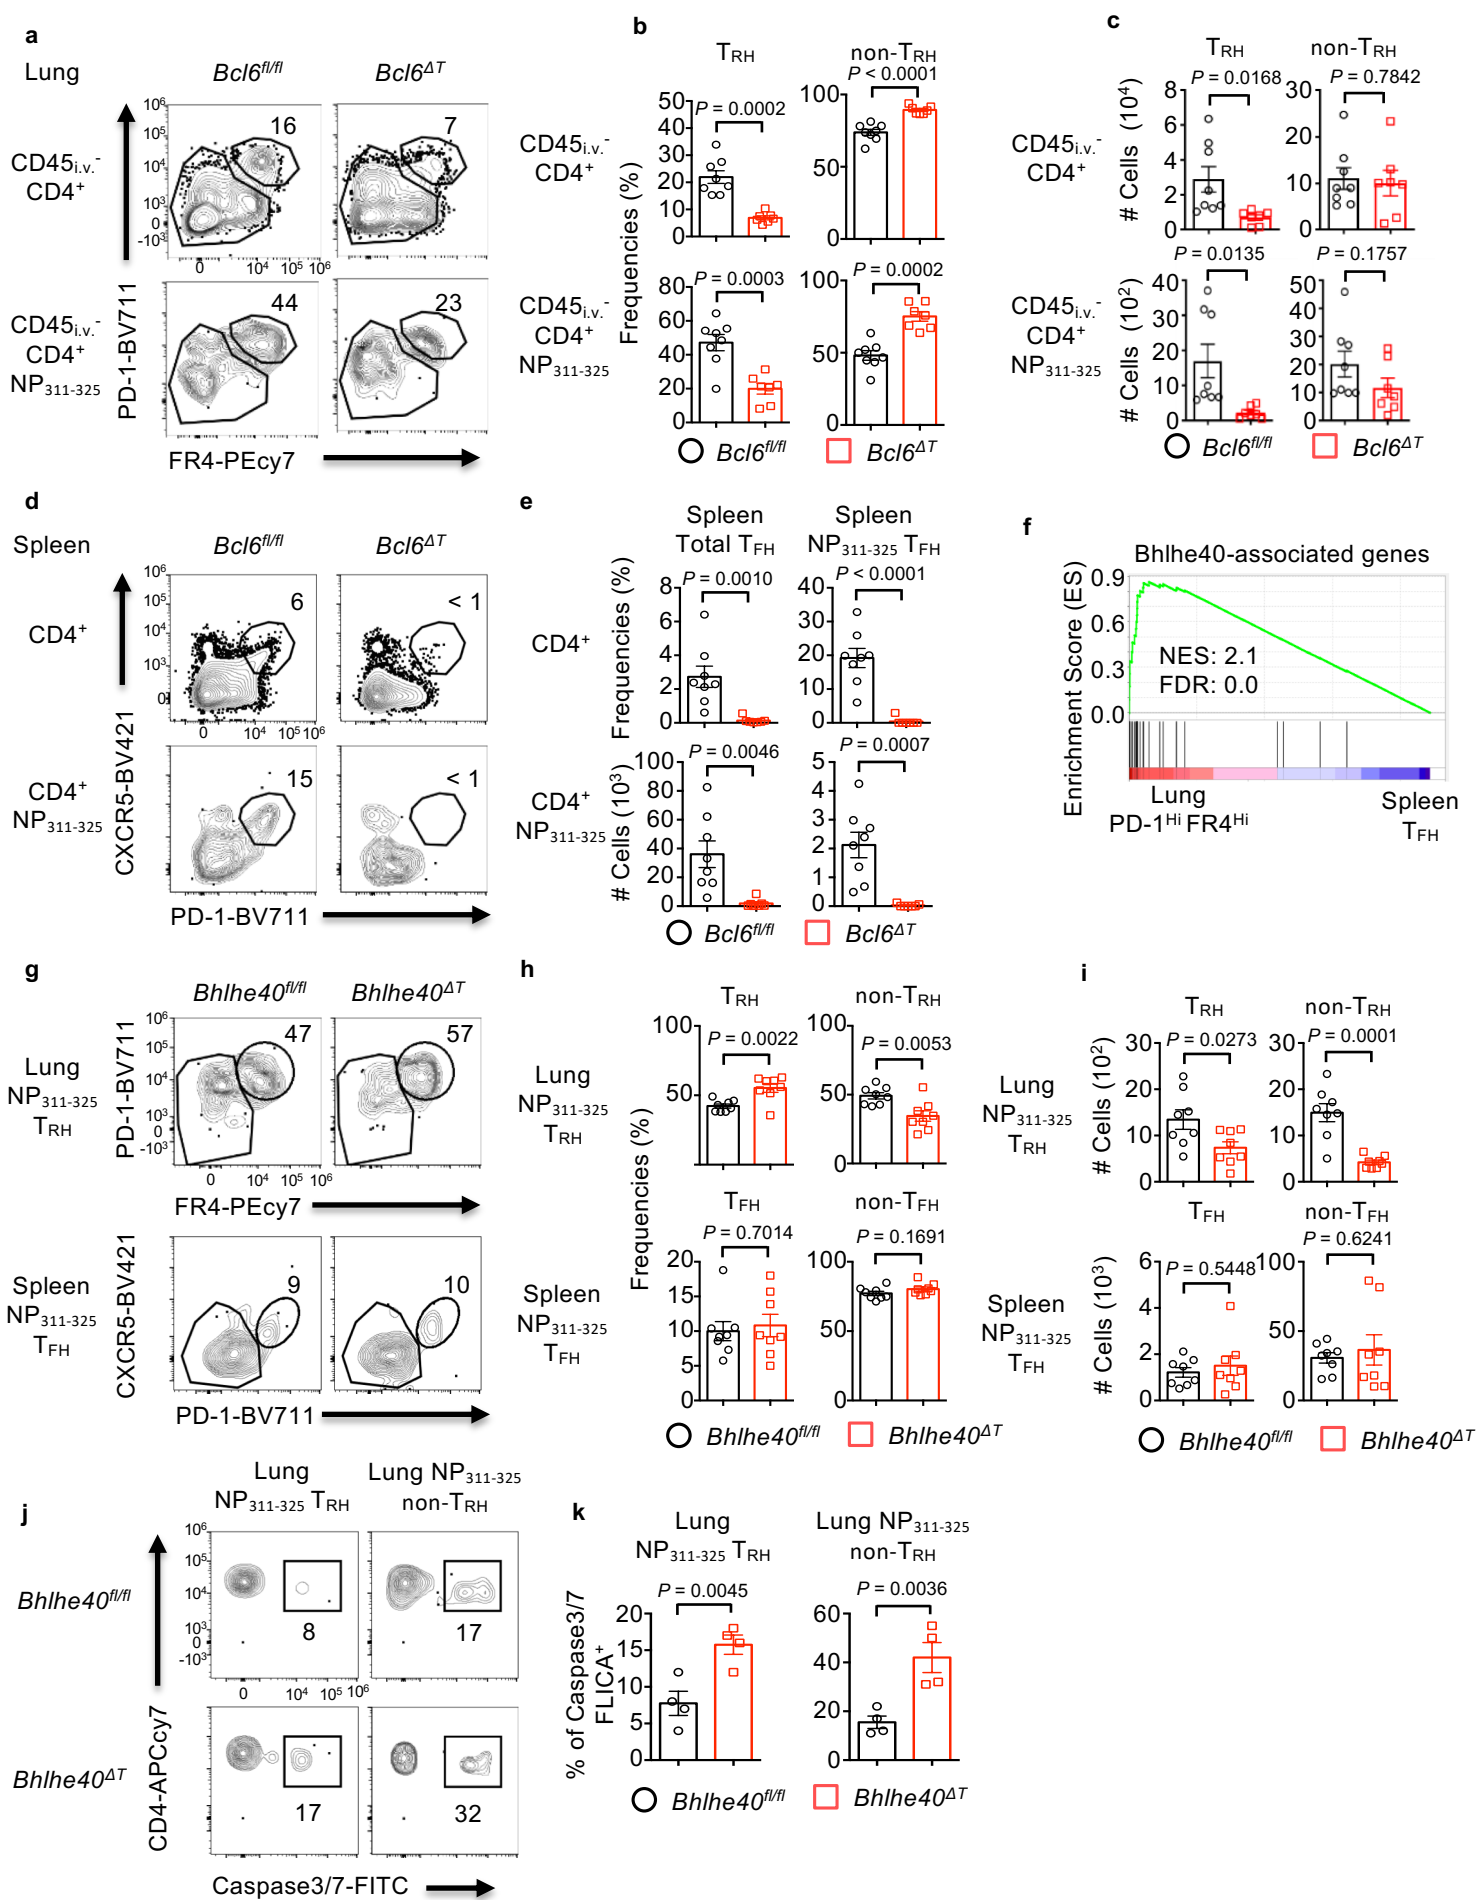

# Figure 7

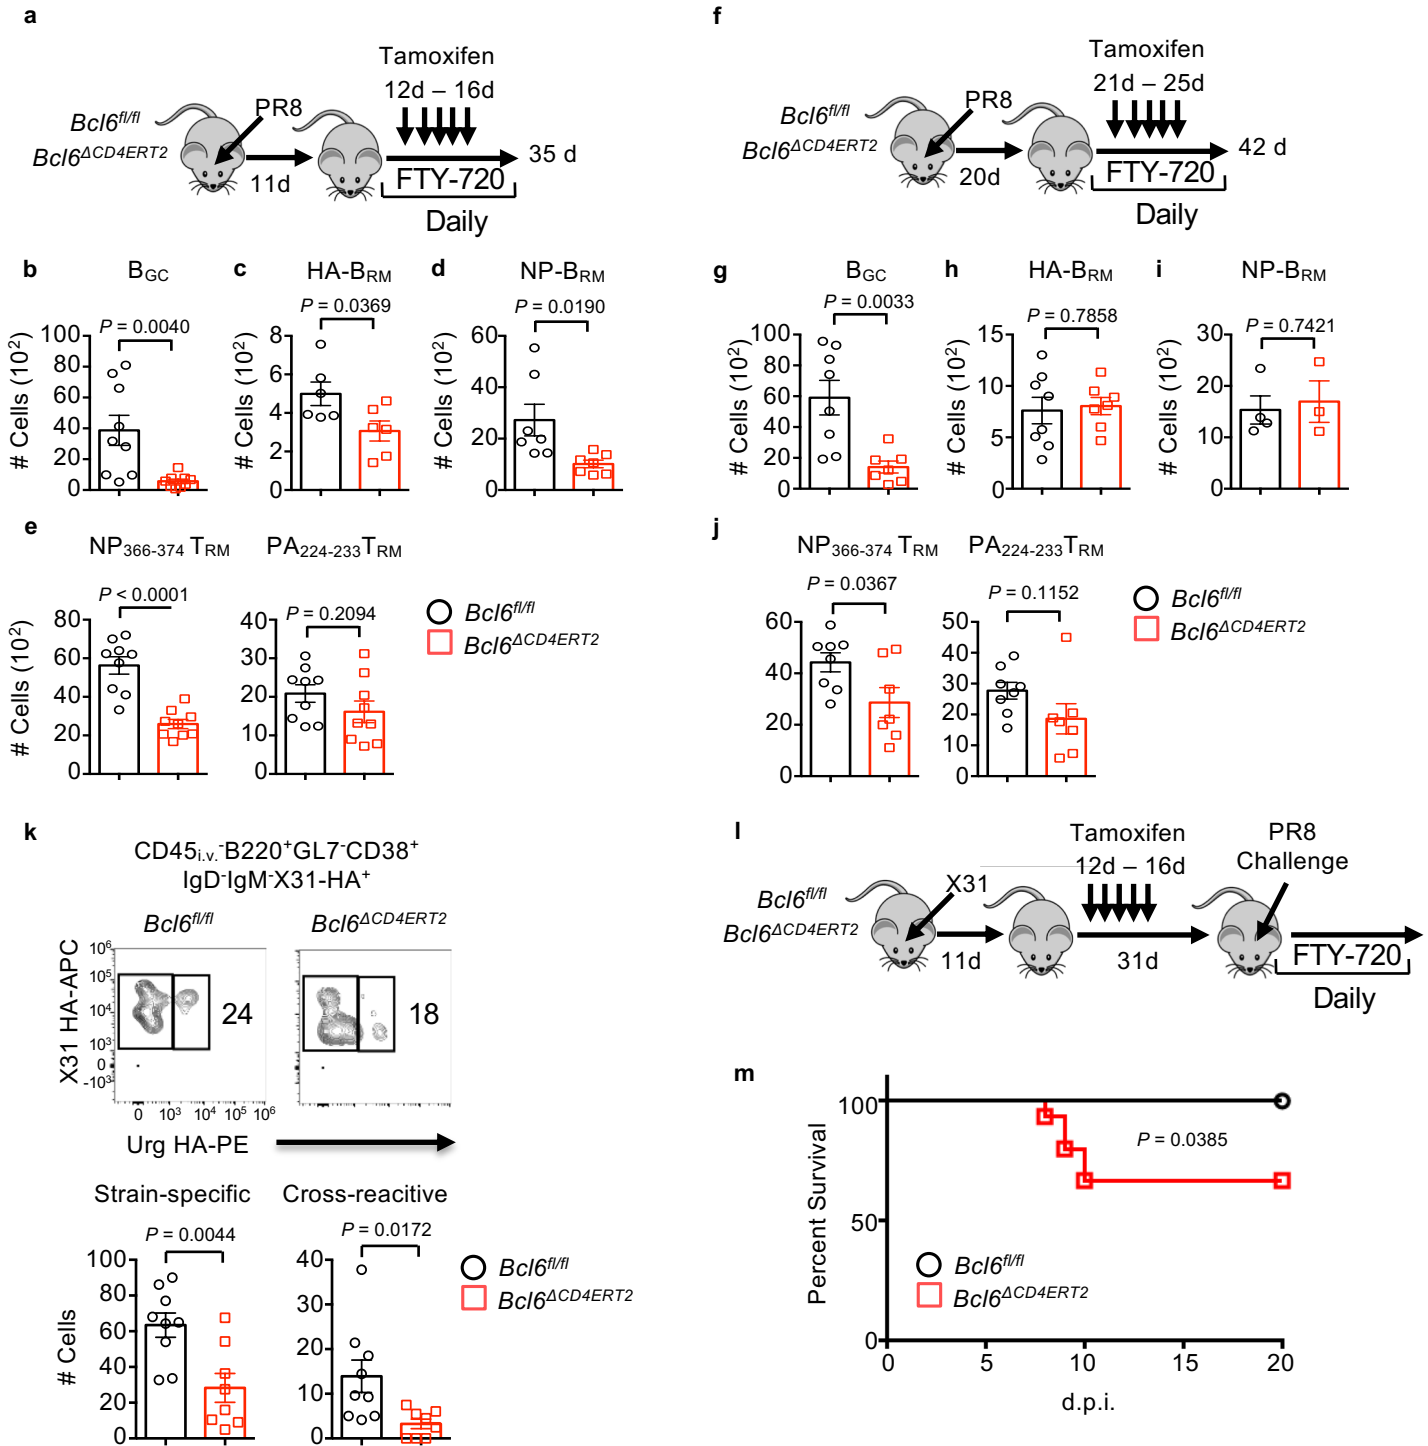

## Figure 8

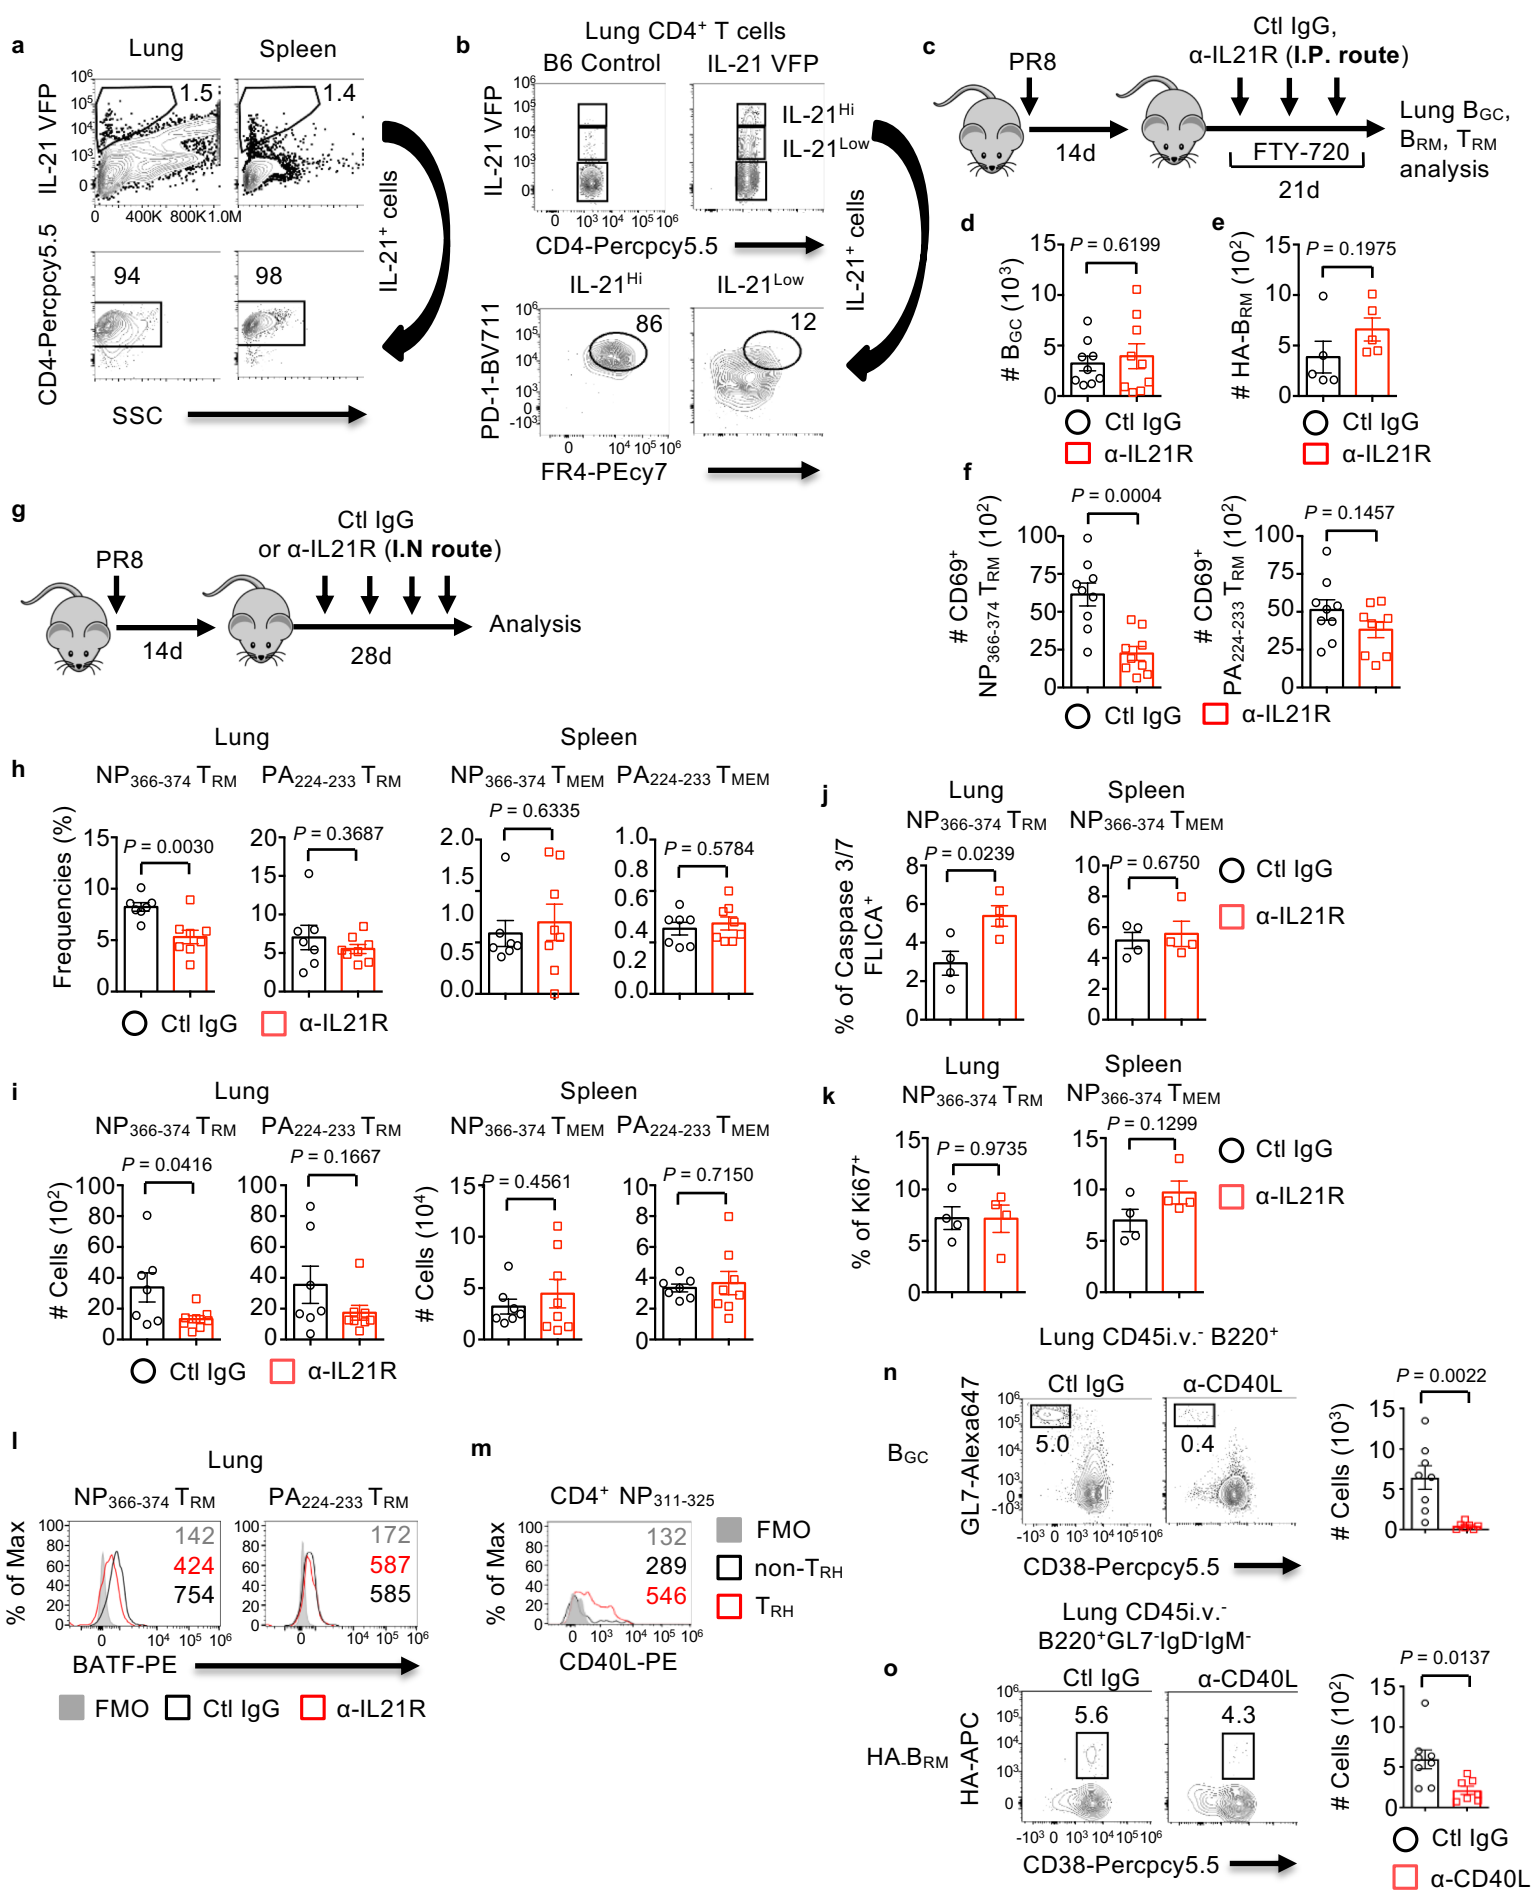



# Extended Fig. 1

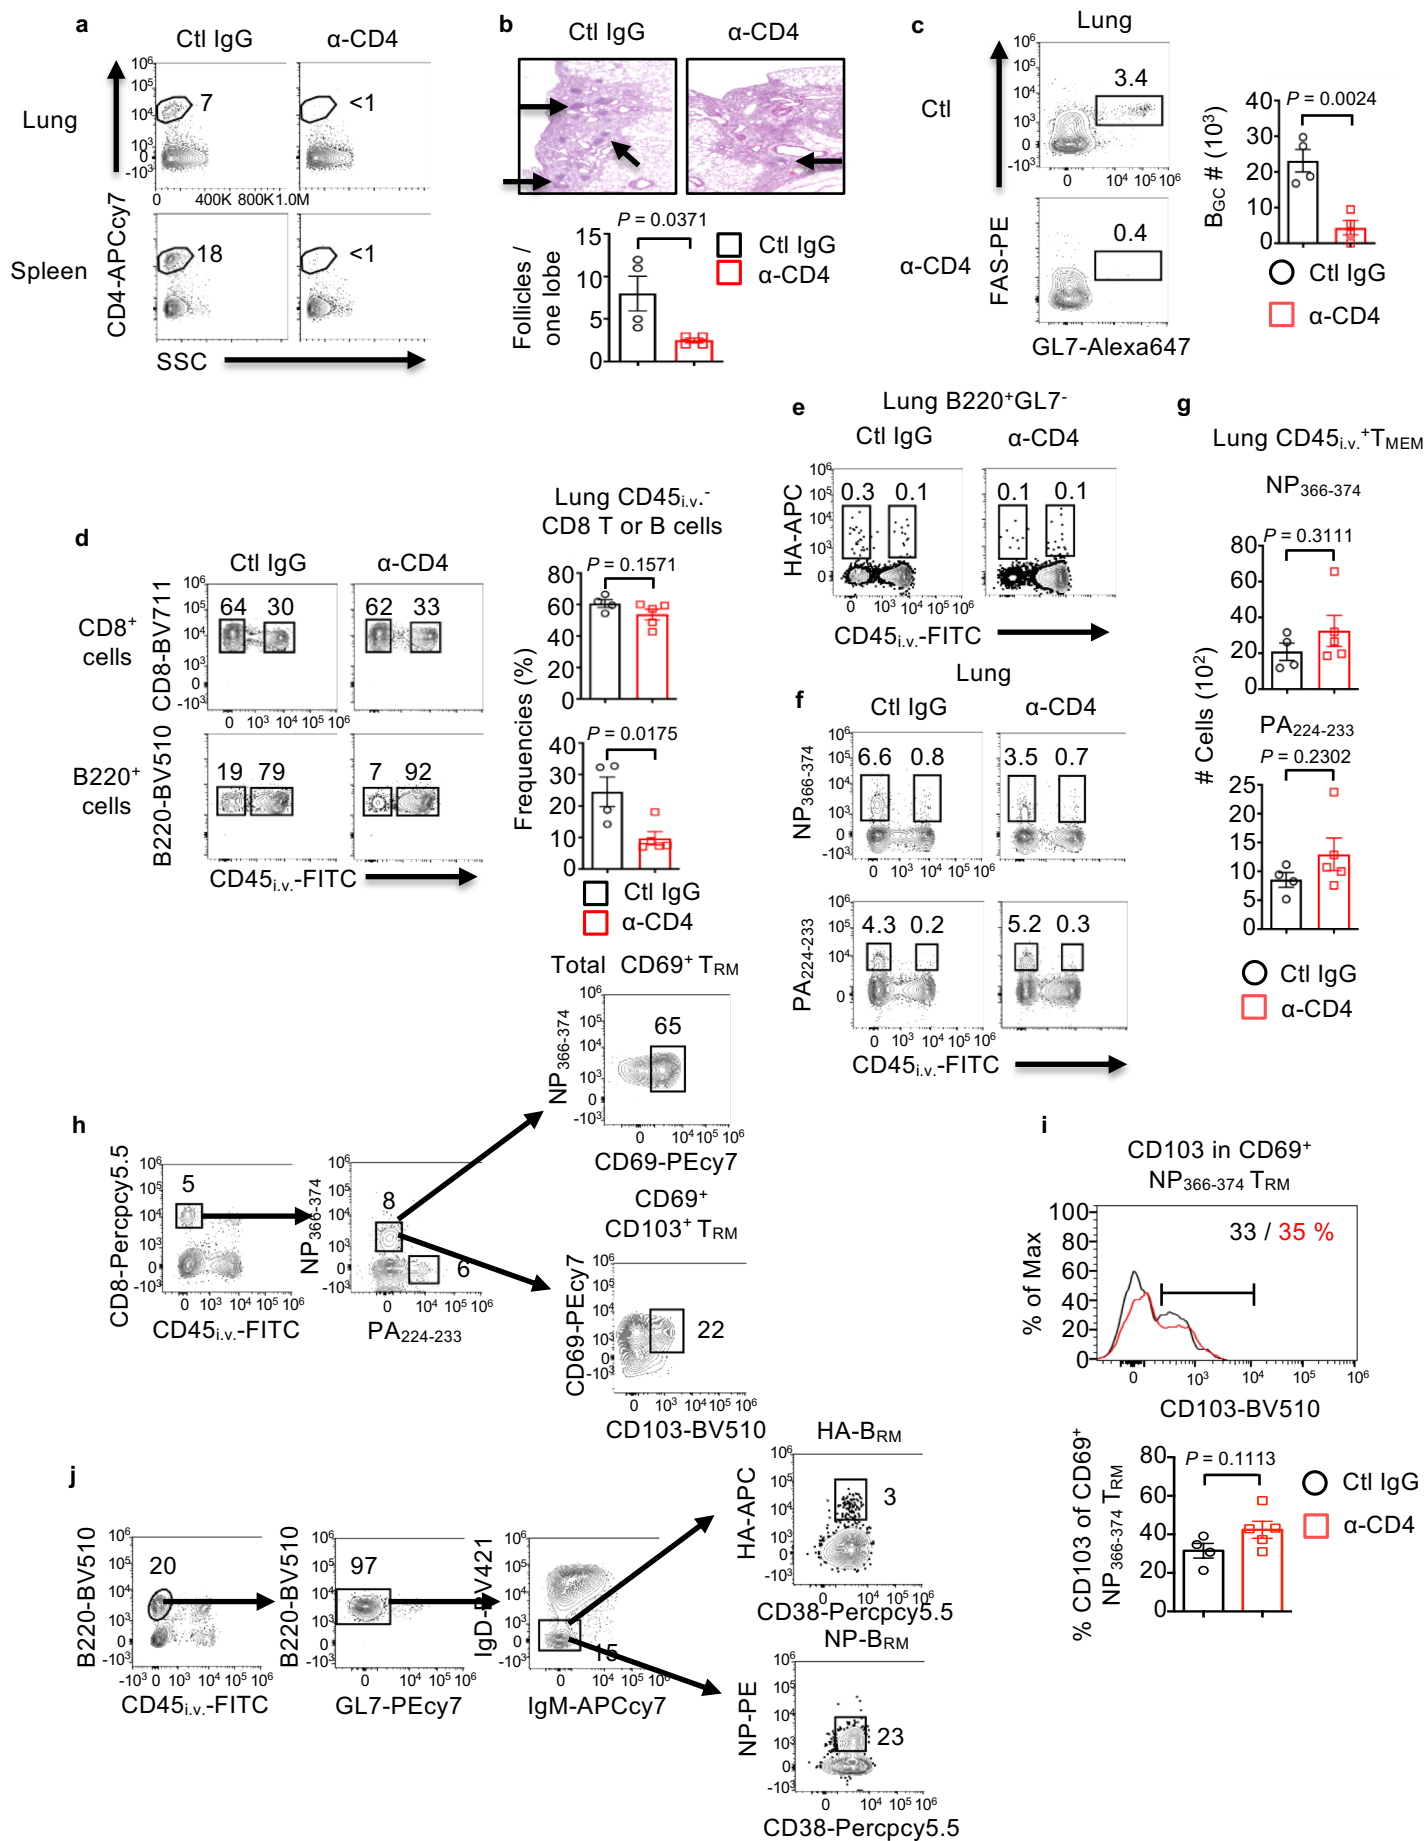



## Extended Fig. 2

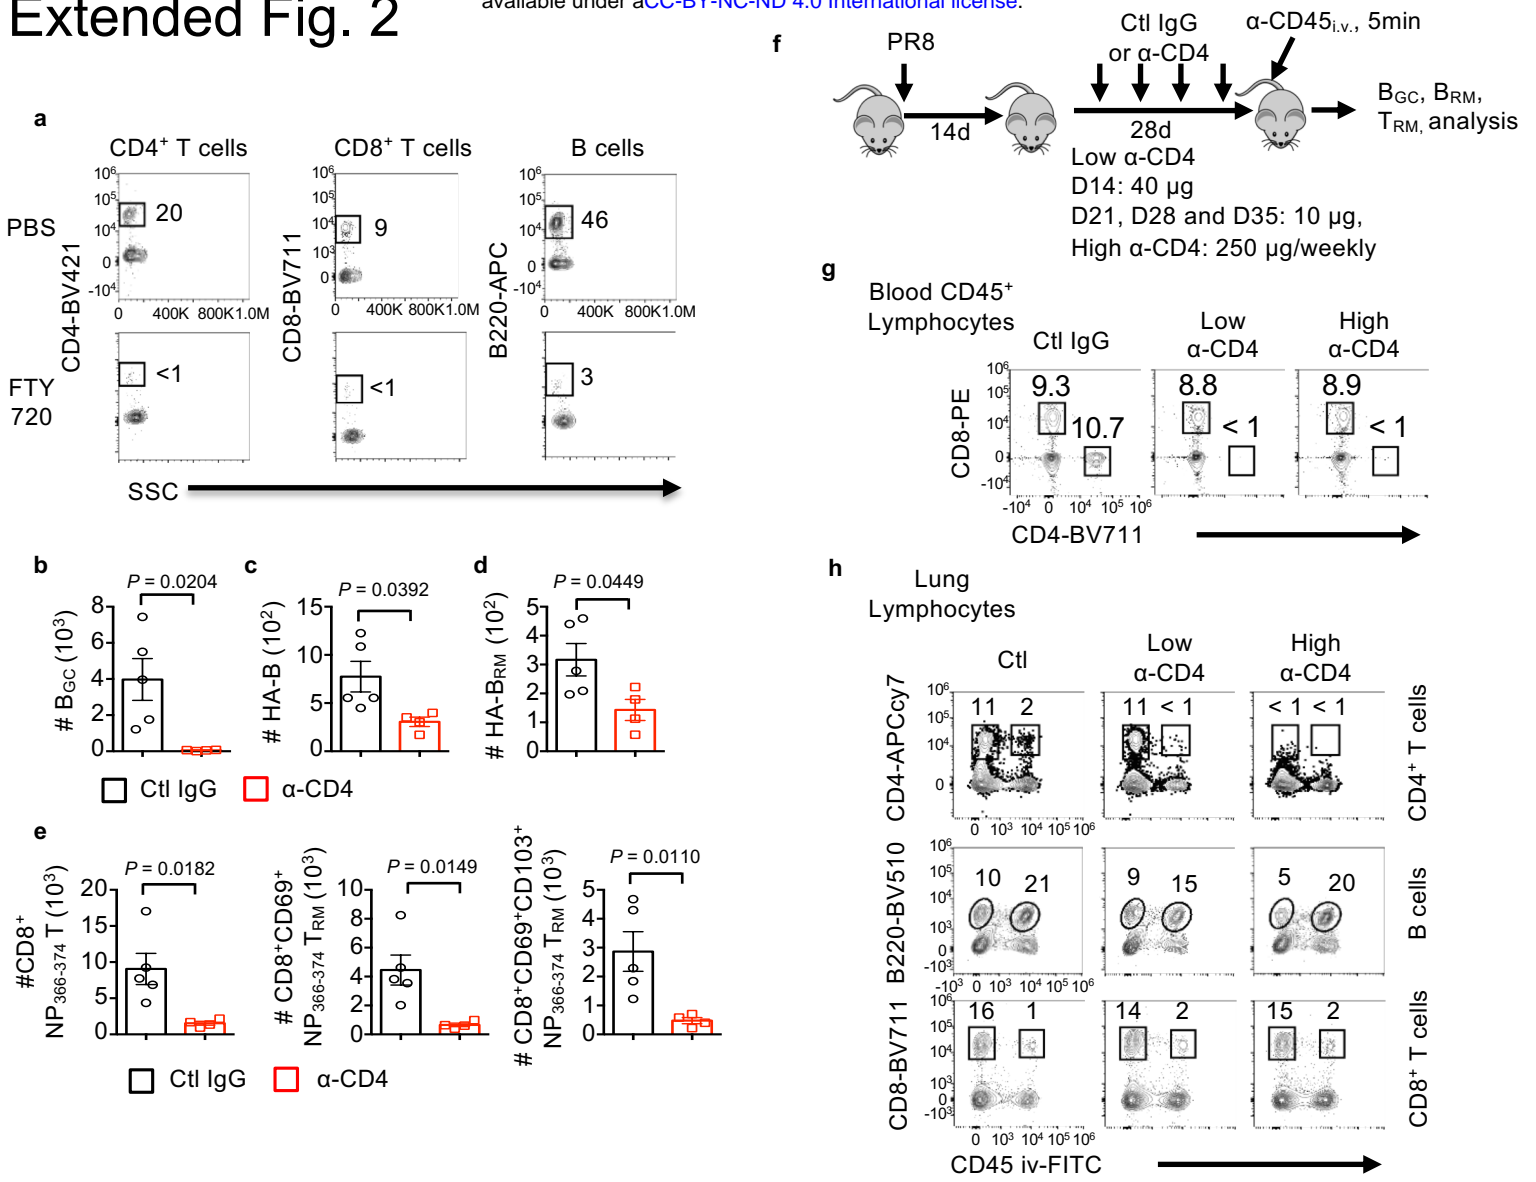

# Extended Fig. 3

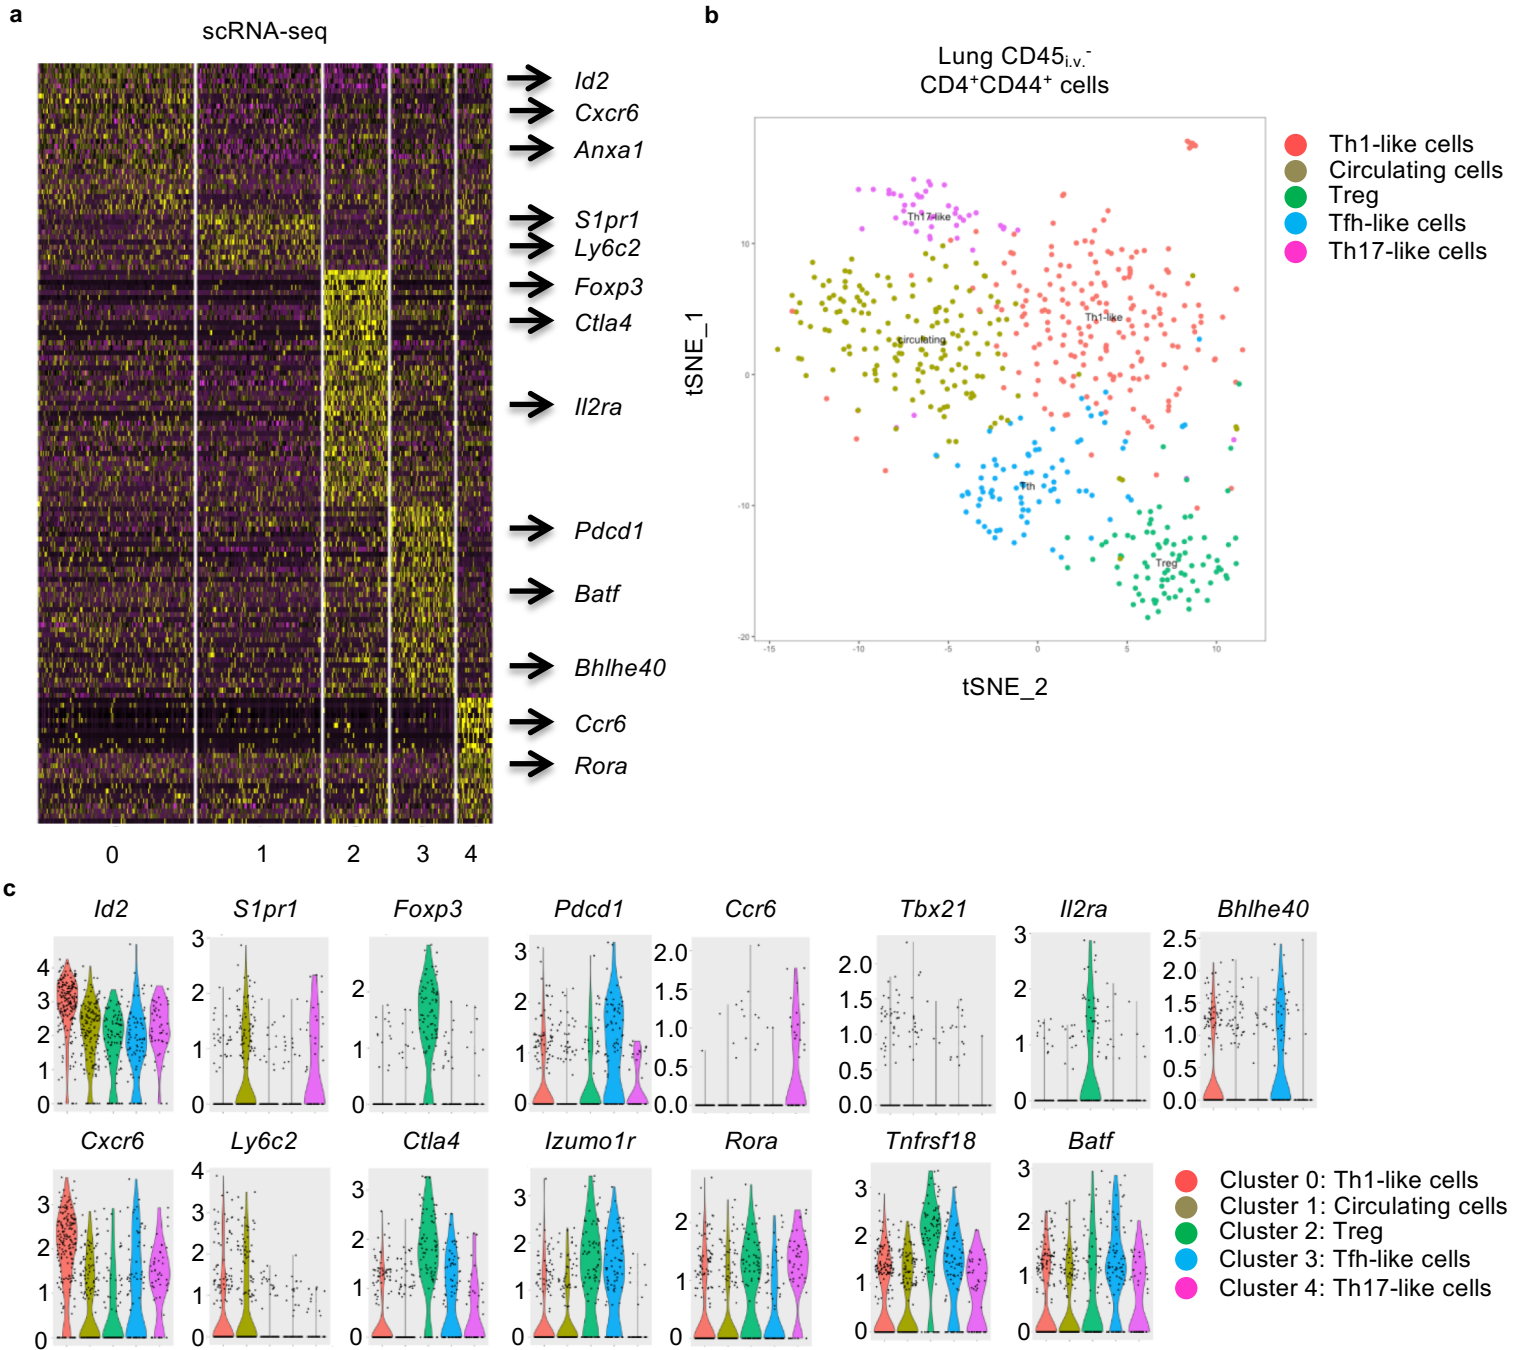

# Extended Fig. 4

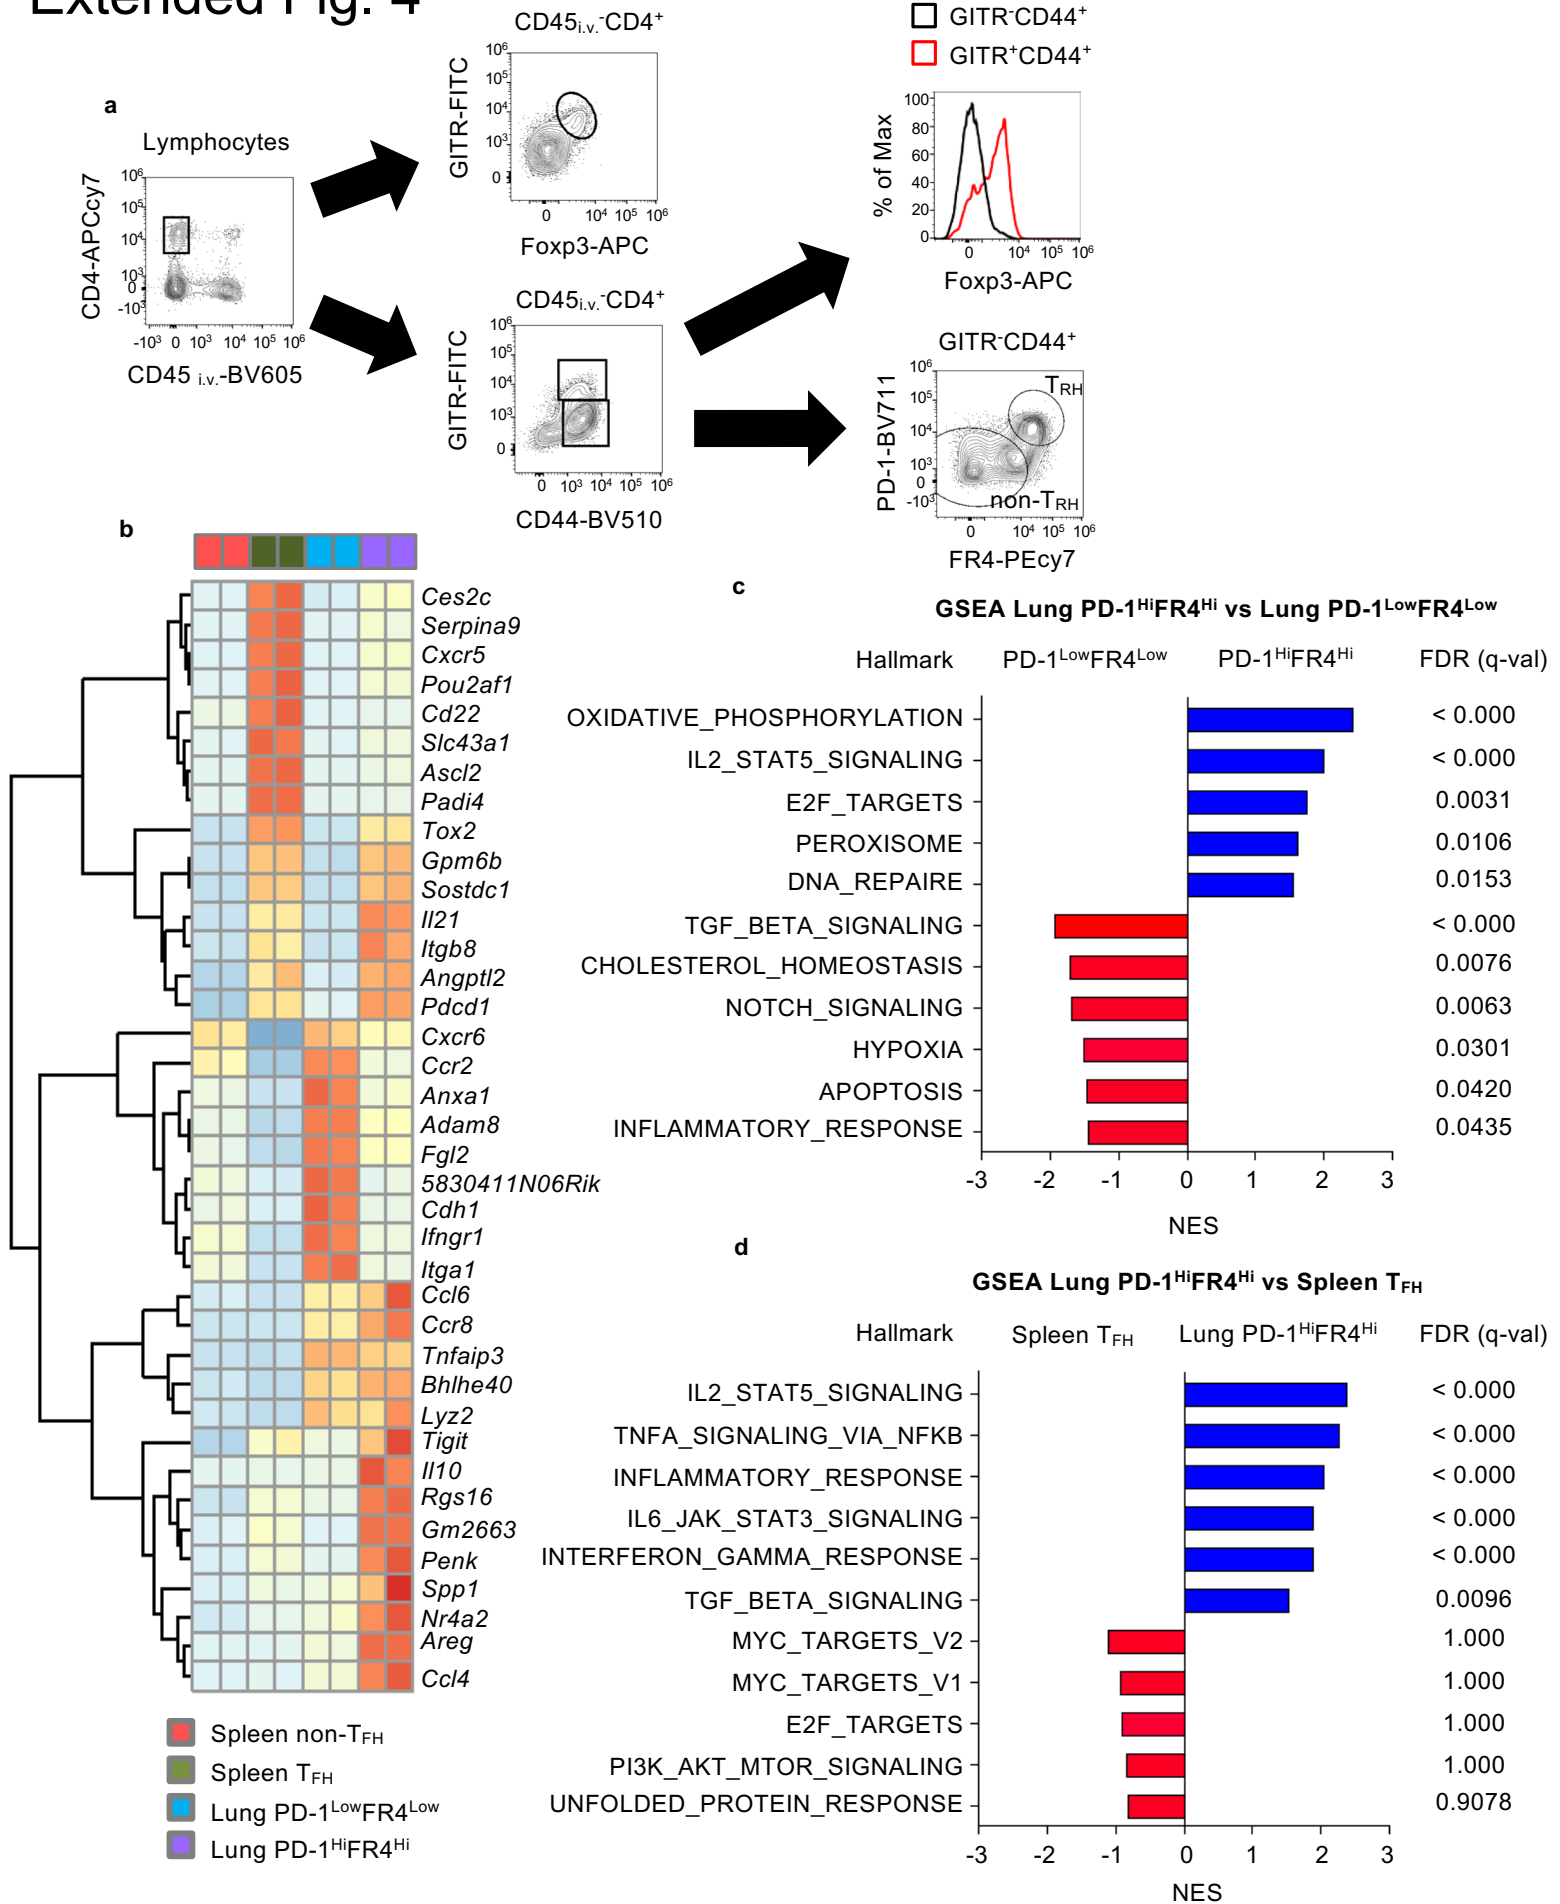

# Extended Fig. 5

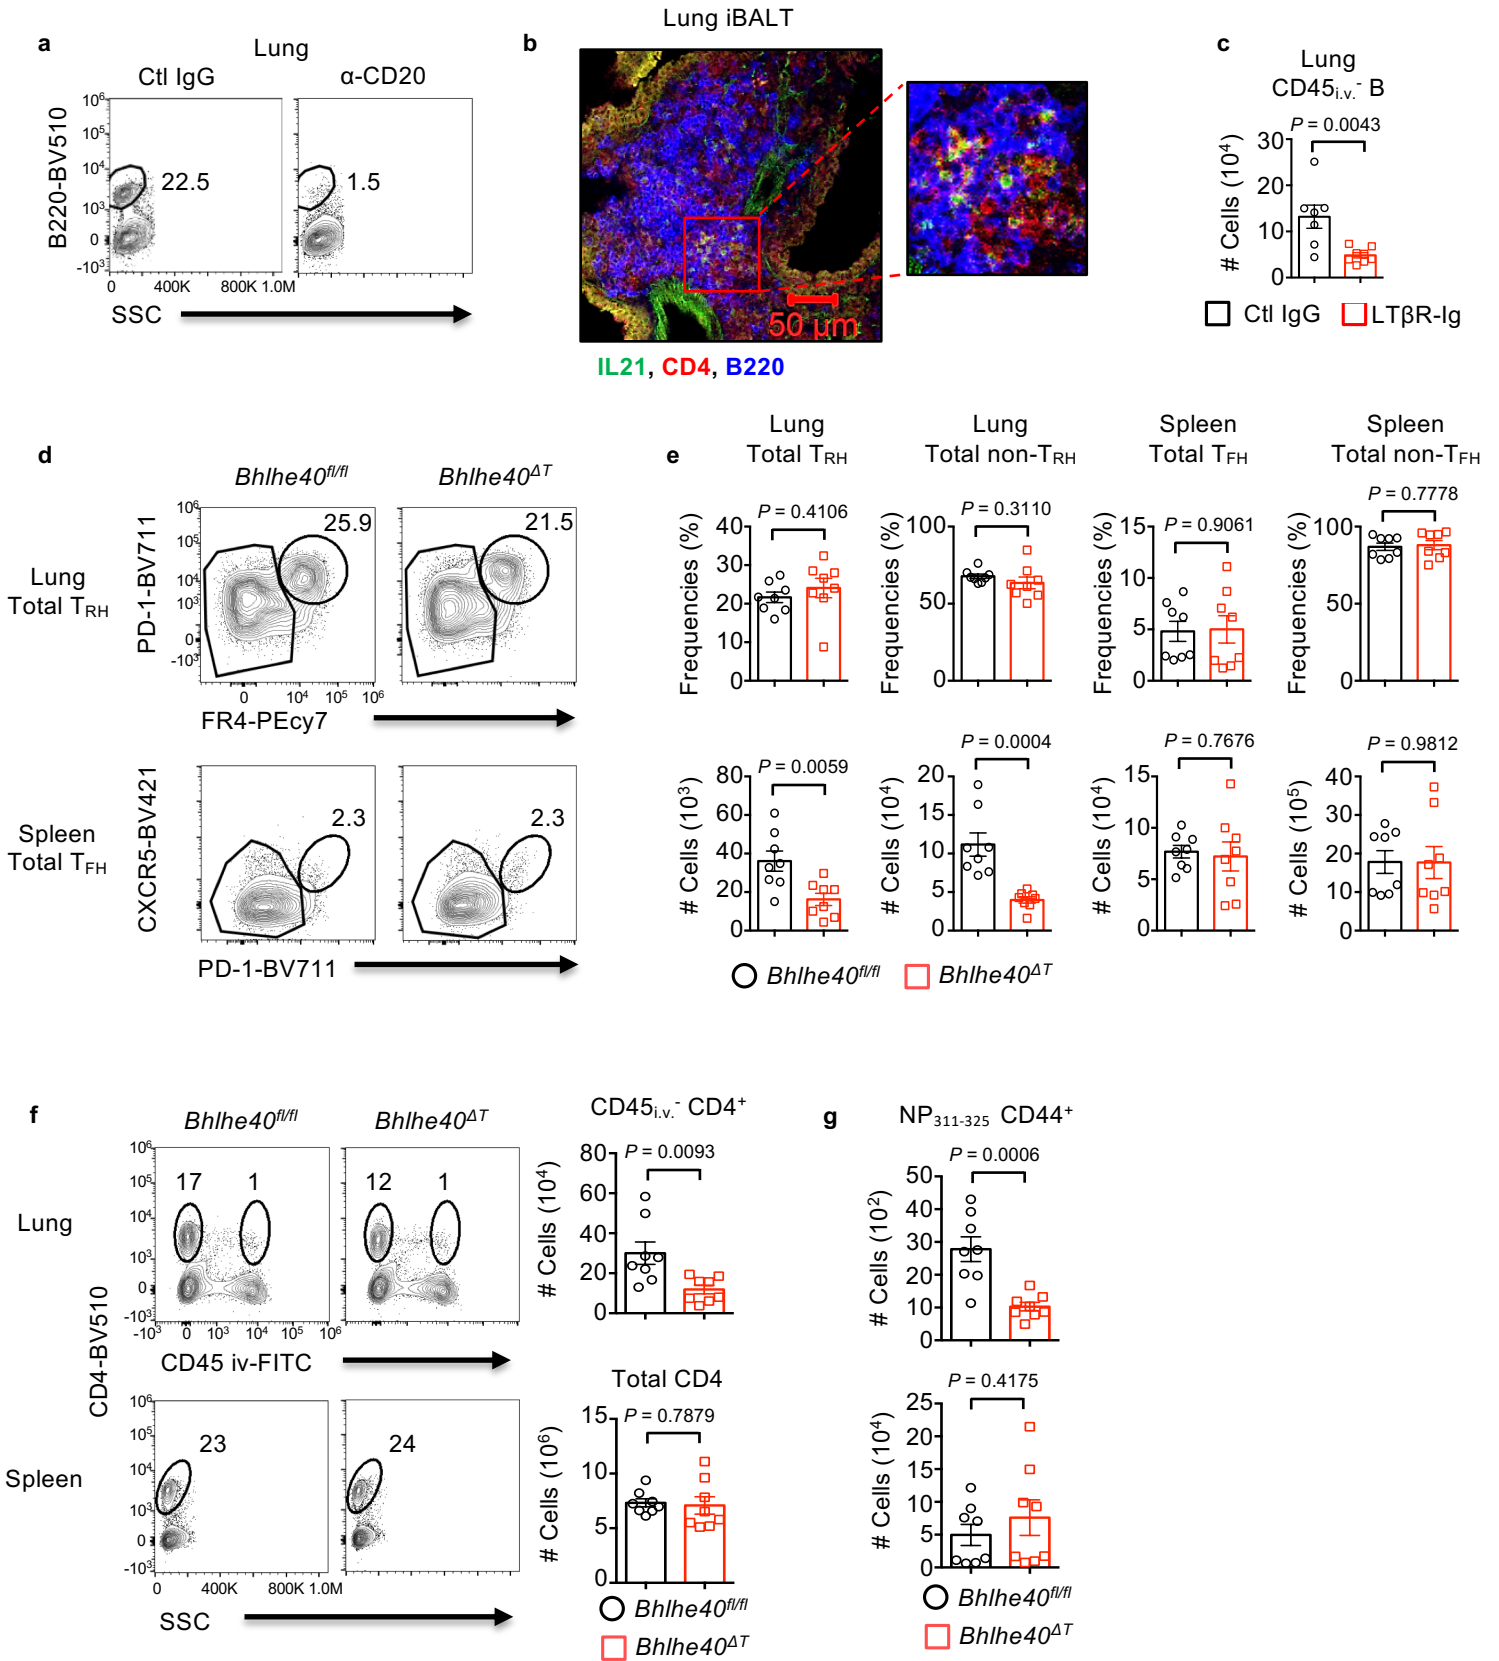

# Extended Fig. 6

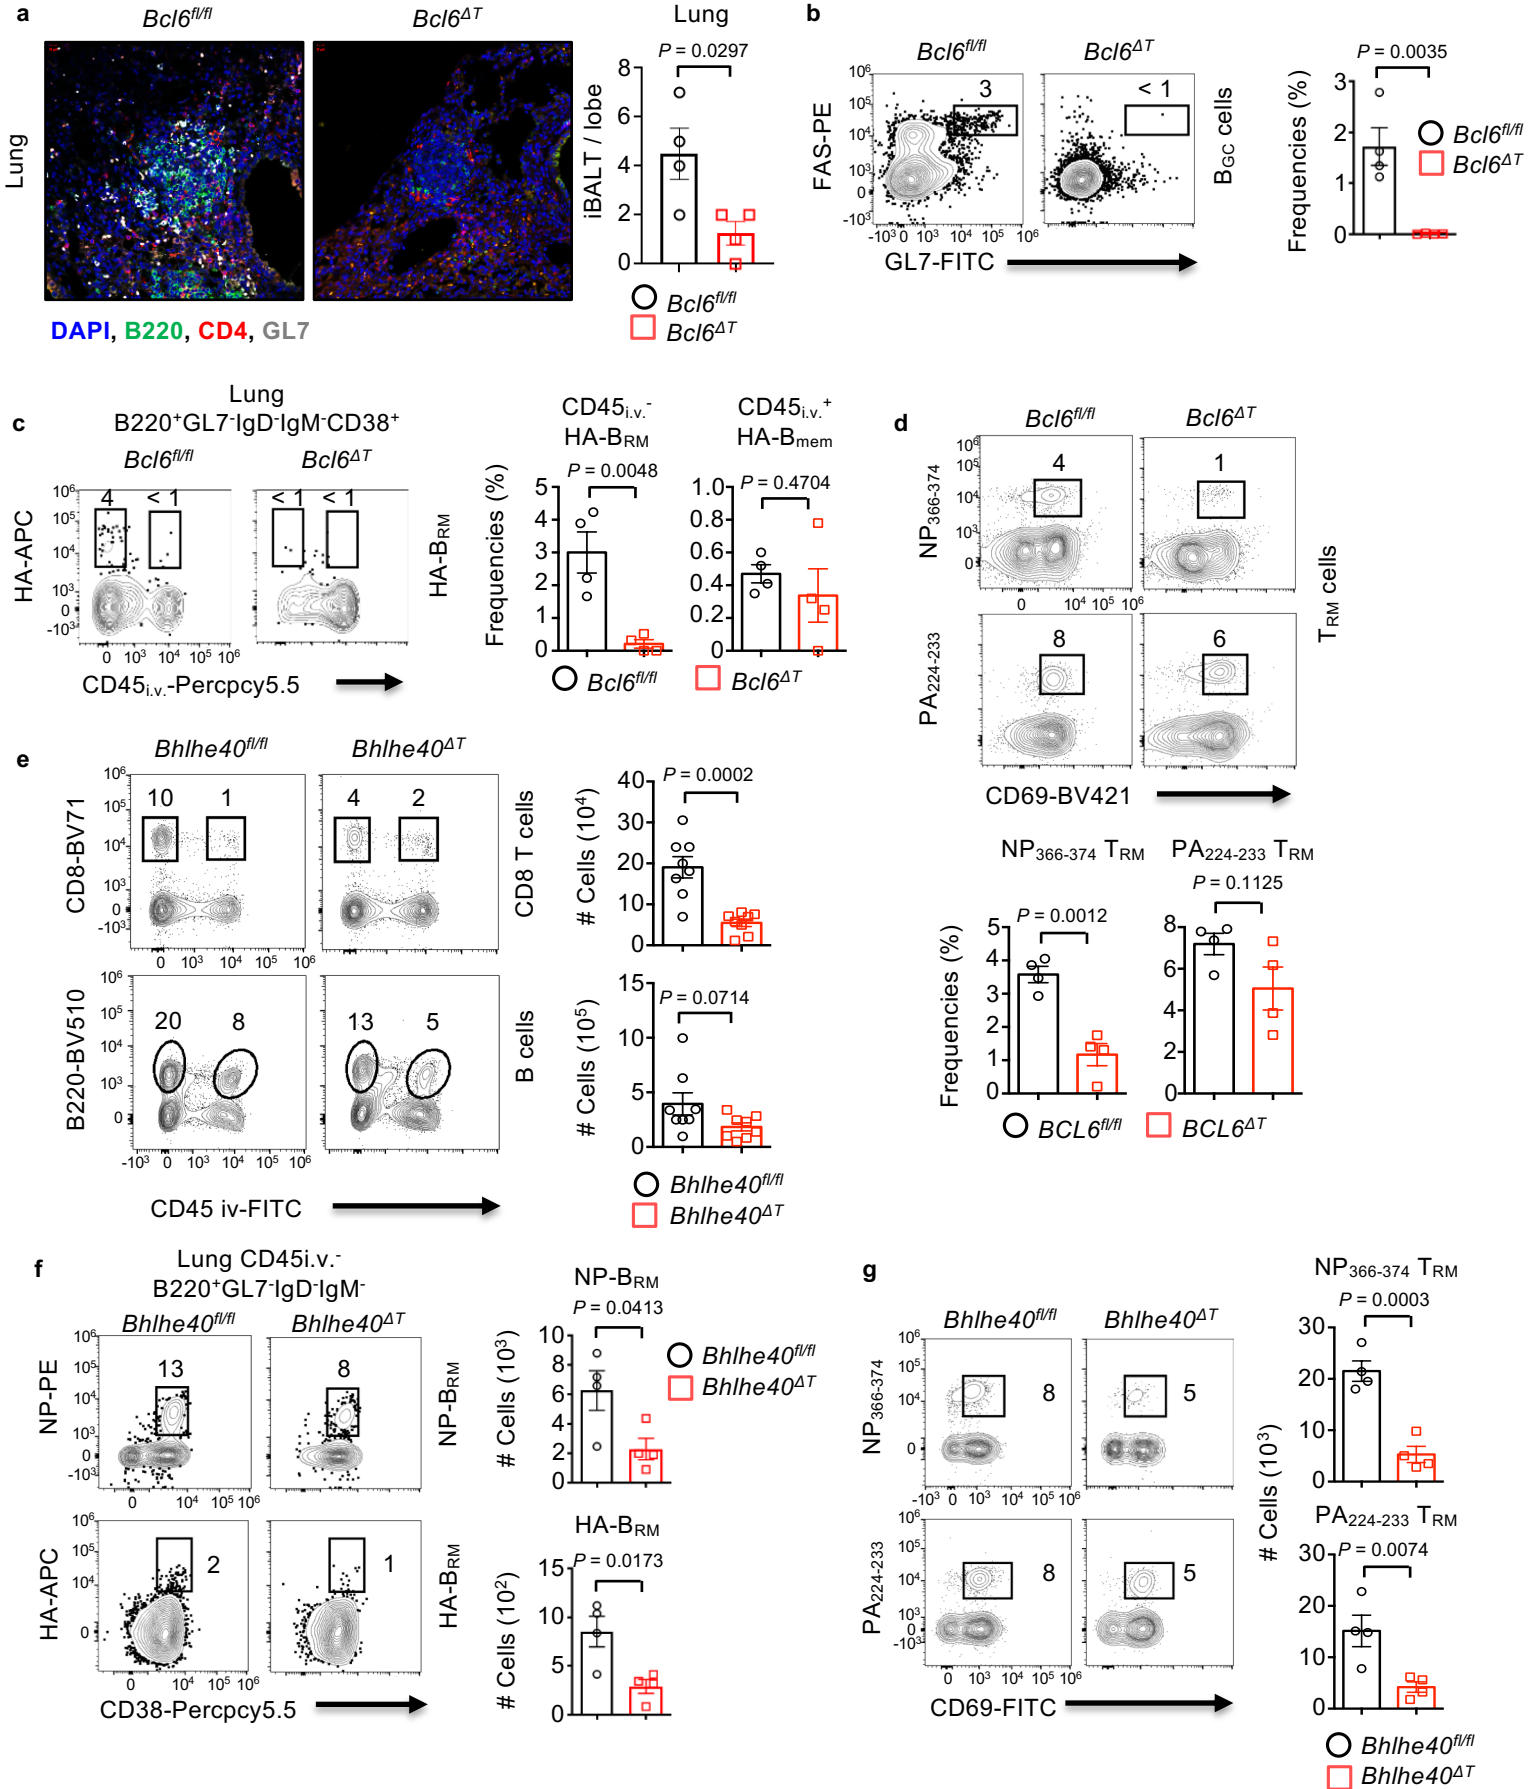



# Extended Fig. 7

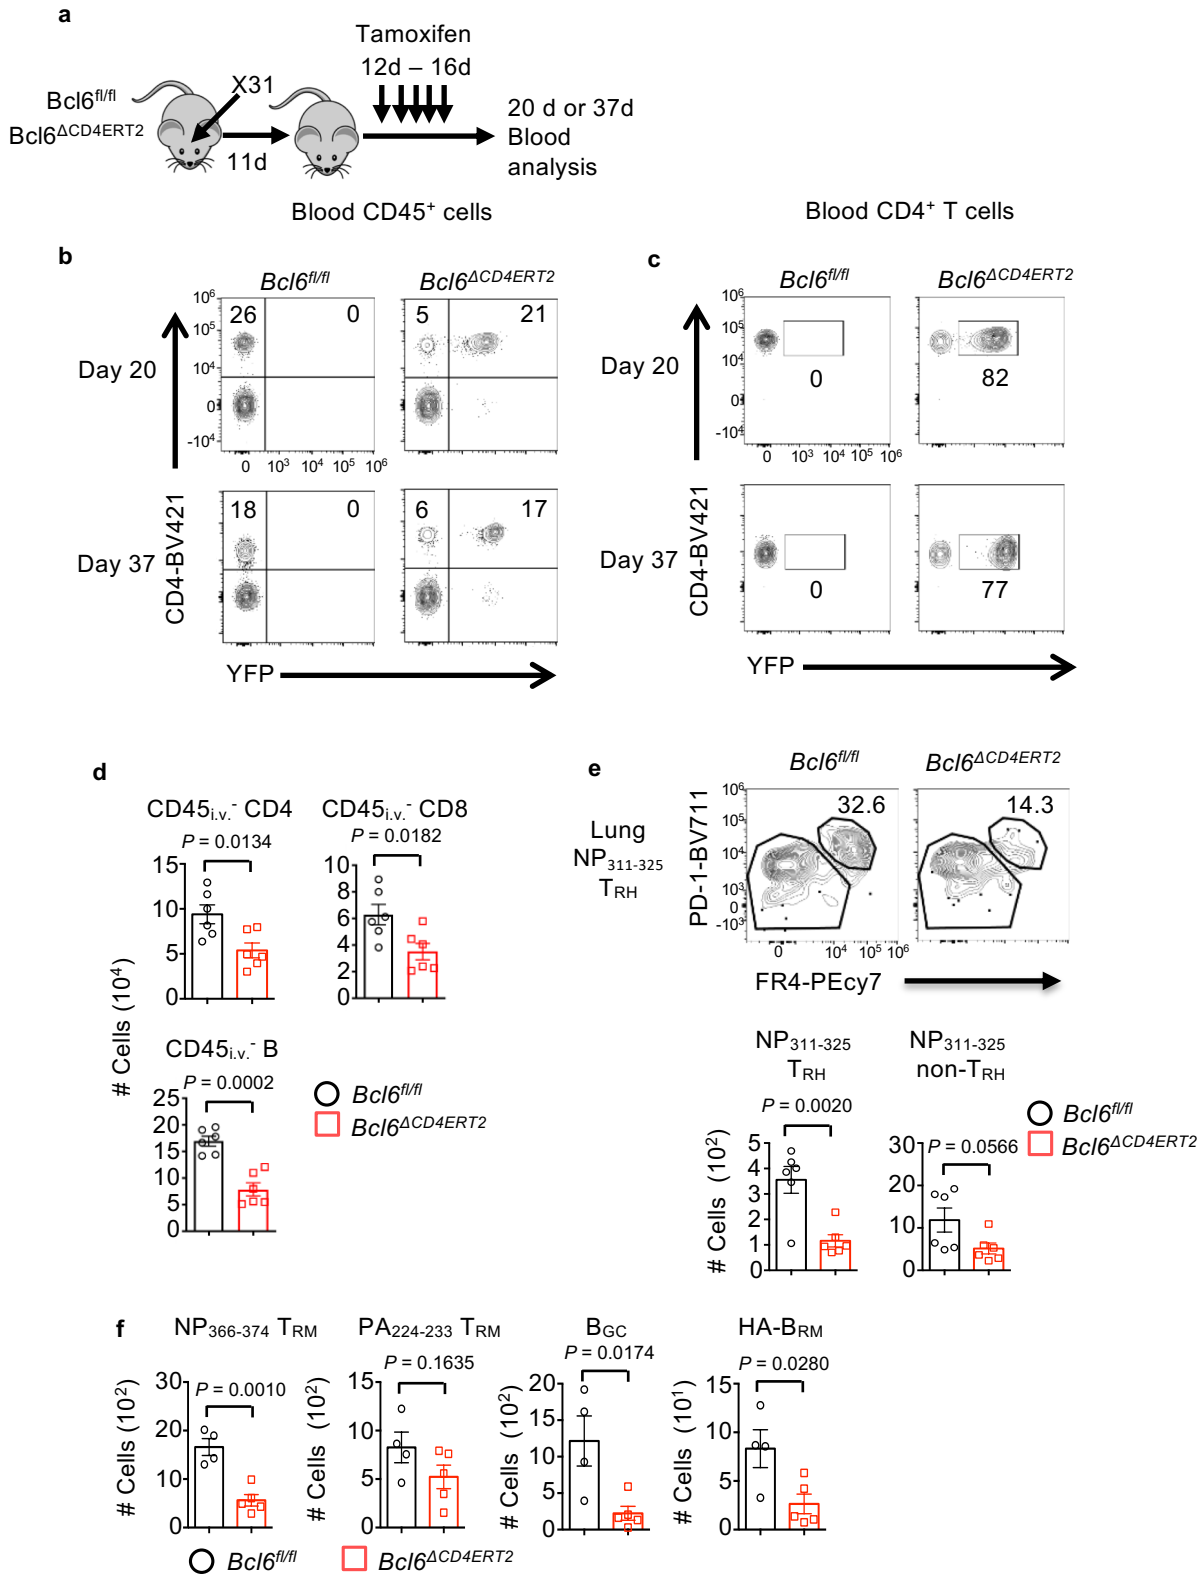

# Extended Fig. 8

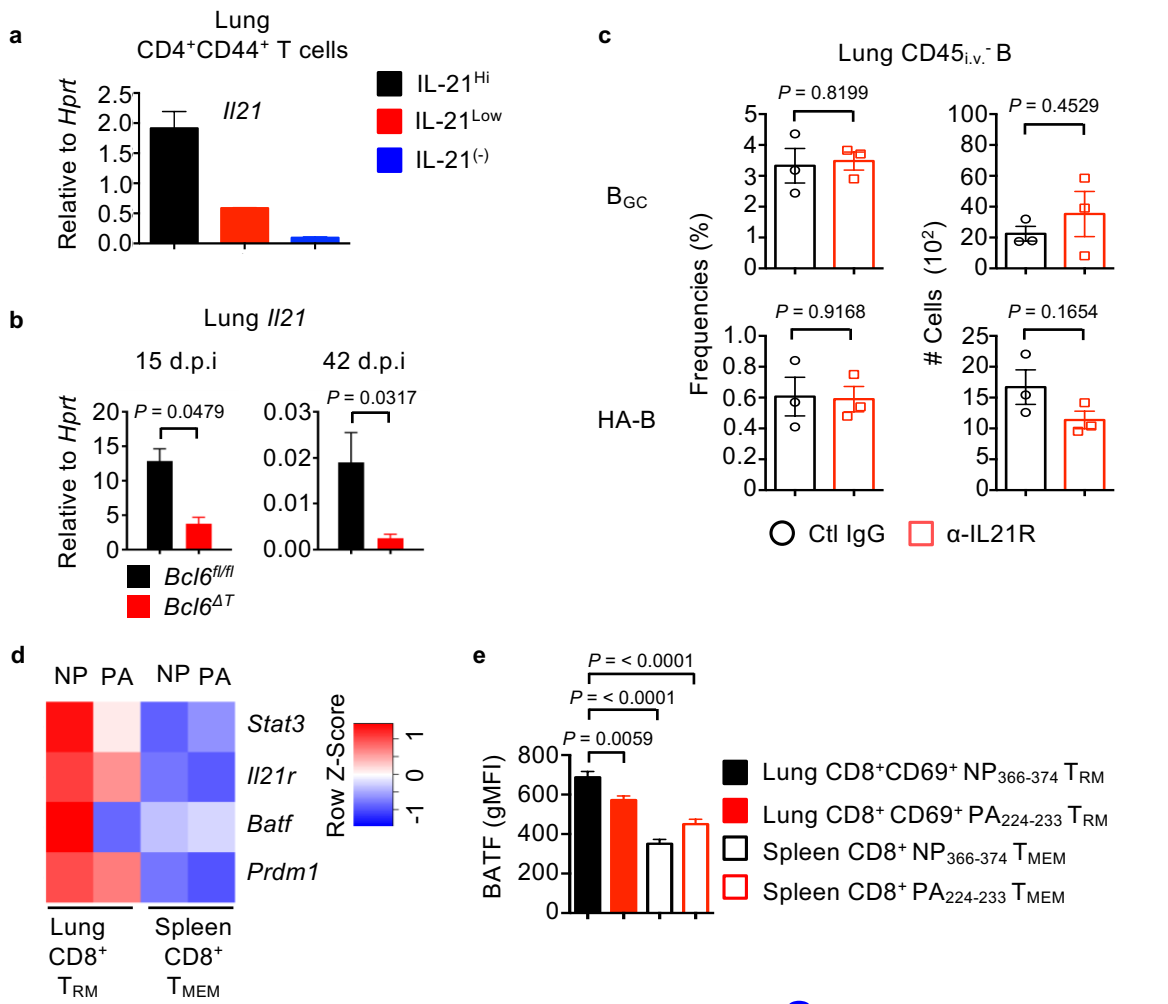

## Summary

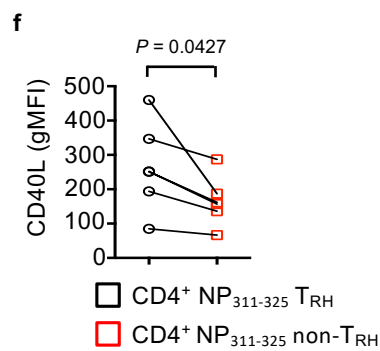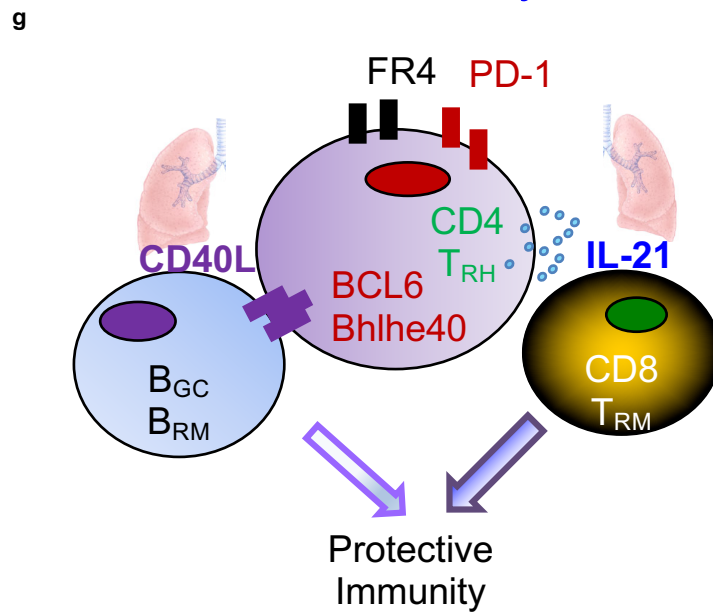

Source: https://www.biorxiv.org/content/10.1101/2020.02.28.970400v1.full.pdf
